# Supplementary material for: The effect of water in THF/water mixtures on CMC, aggregation sizes, and fluorescence quenching of a new calix[4]resorcinarene macrocycle
Source: Royal Society of Chemistry journal article supplement (doi:10.1039/d4cp00687a), 2024-01-01
Supplement: d4cp00687a1.pdf [file d4cp00687a1.pdf]

## **The role of water in THF/water mixtures on CMC, aggregation sizes, and fluorescence quenching of a new calix[4]resorcinarene macrocycle.**

María Virginia Sosa<sup>1</sup>, Kashif Hussain<sup>2</sup>, Eduardo D. Prieto<sup>1,4</sup>, Tatiana Da Ros<sup>3</sup>, M. Raza Shah<sup>2</sup> and Ezequiel Wolcan<sup>1\*</sup>

<sup>1</sup> Instituto de Investigaciones Fisicoquímicas Teóricas y Aplicadas (INIFTA, UNLP, CCT La Plata-CONICET), Diag. 113 y 64, Sucursal 4, C.C. 16, (B1906ZAA) La Plata, Argentina.

<sup>2</sup> H.E.J. Research Institute of Chemistry, International Center for Chemical and Biological Sciences, University of Karachi, 75270, Karachi, Pakistan

<sup>3</sup> INSTM, Department of Chemical and Pharmaceutical Sciences, University of Trieste, Via L. Giorgieri 1, 34127, Trieste, Italy

<sup>4</sup> Departamento de Cs. Biológicas, Facultad de Ciencias Exactas (UNLP), Instituto Ciencias de la Salud, Universidad Nacional Arturo Jauretche (UNAJ), Argentina

\*Ezequiel Wolcan, [ewolcan@inifta.unlp.edu.ar](mailto:ewolcan@inifta.unlp.edu.ar)

## TABLE OF CONTENTS

|                                                                                      |     |
|--------------------------------------------------------------------------------------|-----|
| Materials and Methods.....                                                           | S2  |
| Compounds <b>(a)</b> and <b>C1</b> synthesis reaction .....                          | S6  |
| Compound <b>(a)</b> ESI-MS spectra.....                                              | S8  |
| Compound <b>(a)</b> <sup>1</sup> H NMR spectra .....                                 | S8  |
| Compound <b>C1</b> ESI-MS spectra .....                                              | S9  |
| Compound <b>C1</b> <sup>1</sup> H NMR spectra .....                                  | S9  |
| Absorption spectra at several concentrations in THF/H <sub>2</sub> O solutions ..... | S10 |
| Absorbance vs. concentration of <b>C1</b> at 355 and 600 nm .....                    | S11 |
| Chemometric analysis of absorption spectra .....                                     | S12 |
| DLS measurement.....                                                                 | S15 |
| Normalized luminescence spectra.....                                                 | S17 |
| Chemometric analysis of luminescence spectra .....                                   | S17 |
| AFM measurement.....                                                                 | S18 |
| DFTBA optimized structures as models of <b>C1</b> .....                              | S20 |
| Calculated electronic transitions .....                                              | S21 |
| NTO analysis of electronic transitions.....                                          | S67 |
| References.....                                                                      | S87 |

## MATERIALS AND METHODS

### 1. Materials and Instrumentation

All the necessary chemicals, including 4-hydroxybenzaldehyde, potassium carbonate (K<sub>2</sub>CO<sub>3</sub>), resorcinol, 1-hexadecanoyl chloride, and acetone, were obtained from Wako Pure Chemical Industries in Osaka, Japan. Distilled water was used to prepare all the solutions, and analytical grade solvents were used in this research without any further purification. Commercial-grade solvents (n-hexane, ethyl acetate, dichloromethane) were employed to purify the compounds through silica gel chromatography after distillation. UV-visible analysis was performed using a Cary-60 spectrophotometer, while <sup>1</sup>H-NMR spectroscopy

was carried out using a Bruker AVANCE III spectrometer. Molecular mass was determined by ESI-MS (Bruker Compass Data Analysis 4.2).

## **2. Atomic Force Microscopy**

The formation of **C1** macrocycle aggregates from neat THF or TFH/H<sub>2</sub>O solutions was observed using Atomic Force Microscopy (AFM). The concentration of the macrocycle was kept at  $4 \times 10^{-8}$  M in all experiments, and a 10 ml sample was spotted onto freshly cleaved muscovite mica in a stepwise manner. The sample was then dried under N<sub>2</sub>. All images were captured in ambient conditions with a MultiMode Scanning Probe Microscope (Veeco, Santa Barbara, CA, USA) equipped with a Nanoscope V controller (Veeco, Santa Barbara, CA). The measurements were obtained in tapping mode using probes doped with silicon nitride (RTESP, Veeco) with a tip radius of 8-12 nm, 271-311 kHz, and a force constant of 20-80 N/m. The typical scan rates ranged from 1-1.5 Hz.

## **3. Steady-state and time-resolved emission experiments**

In this study, fluorescence measurements were conducted using single-photon-counting equipment, FL3 TCSPC-SP (Horiba Jobin Yvon), at room temperature. The emission spectra were adjusted for source intensity (lamp and grating) using standard correction curves. Fluorescence quantum yields were measured using an Edinburgh Spectrofluorometer FS5 with SC-30 integrating sphere cassette. For time-resolved fluorescence experiments, a NanoLED excitation source (maxima at 295 nm) was used. The emitted photons were detected by a TBX-04 detector, which was connected to a TBX-PS power supply and counted by a FluoroHub-B module. The DataStation measurement control software application was used to control the module. The counting time window for the measurements reported in this study was 0 - 200 ns. The decay curve was measured at 320, 330, and 340 nm for a given solution. Lifetime analysis was performed using the commercial DAS6 Fluorescence Decay Analysis software. The quality of the fit was assessed by minimizing the reduced chi-squared function ( $\chi^2$ ) and visual inspection of the weighted residuals and their autocorrelation. A fit calculation (up to 2 exponentials) was performed on the separate 320, 330, and 340 nm fluorescence decay curves. For samples with lifetimes in the ns order, an instrument response function calibration (IRF) was performed using a diluted Ludox® dispersion.

#### 4. Dynamic Light Scattering

The size of the particles of **C1** was measured using Dynamic Light Scattering (DLS) in neat THF, as well as in THF/H<sub>2</sub>O mixtures containing different percentages of water (53/47 and 5/95 v/v) at 25°C. The concentration range for DLS measurements of **C1** was between 0.5mM and 1.5mM. The Zetasizer Nano equipment (Nano ZSizer-ZEN3600, Malvern, UK) was used for the measurements.

#### 5. Synthesis of compound C1

The compound **C1** (2, 4, 6, 8-tetrakis (4-hexadecyloxy)-3-methoxyphenyl)-1, 3, 5, 7 (1, 3)-tetrabenzenacyclooctaphan-1<sup>4</sup>, 1<sup>6</sup>, 3<sup>4</sup>, 3<sup>6</sup>, 5<sup>4</sup>, 5<sup>6</sup>, 7<sup>4</sup>, 7<sup>6</sup>-octaol), was synthesized through a reaction between compound (**a**) and resorcinol (see **Scheme S1**). Compound (**a**) was prepared by reacting 4-hydroxy-3-methoxybenzaldehyde with 1-bromohexadecane in the presence of K<sub>2</sub>CO<sub>3</sub> in acetone at 80°C involving a bimolecular nucleophilic substitution reaction. The progress of the reaction was monitored using the TLC technique with the solvent system consisting of n-hexane and ethyl acetate (9:1, v/v). After the reaction was completed, it was stopped and cooled to room temperature. The salt-added water was removed, and the resulting mixture was extracted with ethyl acetate. The extract was then purified through column chromatography using n-hexane and ethyl acetate in a 98:2 ratio (v/v). ESI-MS technique was used to determine the molecular mass (**Figures S1**) which observed at 376.9 *m/z* in agreement with the molecular formula C<sub>24</sub>H<sub>40</sub>O<sub>3</sub>. Further characterization was performed by <sup>1</sup>H-NMR, FTIR, and their melting point. The <sup>1</sup>H-NMR of (**a**) was performed at 400 MHz in CDCl<sub>3</sub> (**Figure S2**). A triplet of 3H proton of CH<sub>3</sub> appeared at δ = 0.87 ppm with coupling constant 7.4 Hz, a multiplet of 26H of CH<sub>2</sub> at δ = 1.23 ppm, a triplet with 2H of methylene at δ = 1.42 ppm with coupling constant 8.0 Hz, a triplet of 2H of CH<sub>2</sub> at δ = 1.59 ppm with coupling constant 8.0 Hz, a singlet of 3H of OCH<sub>3</sub> at δ = 3.90 ppm, a triplet of 2H of CH<sub>2</sub> at δ = 4.05 ppm with coupling constant 8.0 Hz, a doublet of 1H of benzene at δ = 6.92 ppm with coupling constant 8.0 Hz, a quartet of 2H of CH of aromatic ring at δ = 7.38 ppm with coupling constant 8.0 Hz. FT-IR (KBr, cm<sup>-1</sup>): 2917.4 (C-H, CH<sub>3</sub>), 2847.8 (C-H, CH<sub>2</sub>), 1679.0 (aromatic aldehyde, CHO), 1590.2 (C=C, aromatic group), 1272.4 (ether, -O-CH<sub>3</sub>, -O-CH<sub>2</sub>).<sup>1</sup>Yield: 1640 mg, 87.2 %, M.P.: 68.2 - 70.1 °C.

The compound **C1** was obtained by cyclizing compound (**a**) and resorcinol in the presence of sulfuric acid as a catalyst and acetic acid as a solvent. The reaction mixture was heated at 80°C for 18 hours. A brown precipitate was formed, which was filtered, and various spectroscopic techniques were utilized for the characterization of the synthesized compound. ESI-MS technique was used to determine the molecular mass (**Figures S3**). For compound **C1** the mass was observed at 1872.3  $m/z$ , in agreement with the formula  $C_{120}H_{176}O_{16}$ . The  $^1H$ -NMR were performed at 400 MHz in pyridine (**Figure S4**) and a triplet of 8H of terminal methyl group appeared at  $\delta = 0.84$  ppm with coupling constant 7.2 Hz, a multiplet of 104H of methylene appeared at  $\delta = 1.26$  ppm, a triplet of 8H of  $CH_2$  appeared at  $\delta = 1.52$  ppm with coupling constant 7.2 Hz, a singlet of 12H of  $OCH_3$  appeared at  $\delta = 3.68$  ppm, a quartet of 8H of  $CH_2$  appeared at  $\delta = 4.04$  ppm with coupling constant 8.0 Hz, a triplet of 8H of ArCH with coupling constant 3.6 Hz appeared at  $\delta = 6.78$  ppm, a triplet of 8H of ArCH appeared at  $\delta = 6.81$  ppm with coupling constant 5.2 Hz, a triplet of 8H of ArCH appeared at  $\delta = 6.92$  ppm with coupling constant 2.4 Hz, a singlet of 8H of OH appeared at  $\delta = 8.69$  ppm. FT-IR (KBr,  $cm^{-1}$ ): 3449.4 (resorcinol, OH), 2922.9 (C-H,  $CH_3$ ), 2852.2 (C-H,  $CH_2$ ), 1611.2 (C=C, aromatic group), 1513.1 (C=C, aromatic group), 1261.8 (ether, -O- $CH_3$ , -O- $CH_2$ ).<sup>1</sup> Yield: 1670 mg, 89 %. M.P. 170-174 °C.

First step

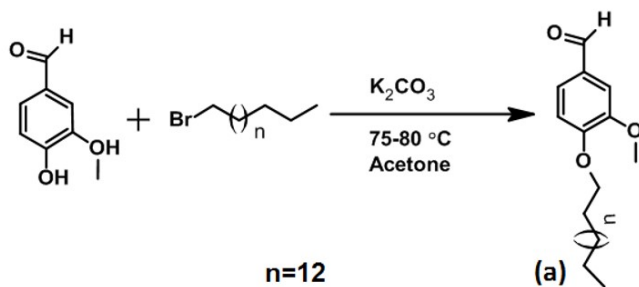

Second step

## 6. Theoretical calculations

Density functional theory (DFT) calculations were carried out using Gaussian 16 program package.<sup>2</sup> The structures of the compounds in their ground state were optimized with DFTBA in a vacuum as implemented in the Gaussian 16. DFTBA is a version of the density-functional-based tight-binding semi-empirical calculation that uses analytic expressions for the

**Scheme S1.** The schematic illustration shows the synthesis of a functionalized calix4resorcinarene macrocycle through a two-step reaction.

matrix elements rather than tabulated ones. No symmetry constraints were utilized in the full optimization of the structures of the compounds in their ground state. Time-dependent DFT calculations, (TD-DFT), were used to locate the lowest-energy 40 vertical excitations of singlet spin multiplicity, starting from the ground-state minimum-energy geometry of each compound. We screened several functionals to predict the electronic structure accurately. The screening process involved the use of various hybrid functionals such as PBE0, B3LYP, CAM-B3LYP, and MN-15 in TD-DFT calculations. These calculations were combined with the polarizable continuum model (PCM) to simulate THF solvation effects. The aim was to obtain a good fit of the experimental absorption spectra with the calculated one. The 6-31G(d,p) basis set was used for all the atoms. After analyzing the results, it was found that the B3LYP hybrid functional gave the most accurate results in reproducing the experimental absorption spectra of the compounds. As a result, all TD-DFT calculations reported below were carried out with the B3LYP functional. The nature of the transitions was assessed with the help of Natural Transition Orbital (NTO) analysis to obtain a more compact orbital representation for the associated electronic transition density matrix. All the pictures showing molecular geometries and orbitals were created using GaussView 6.<sup>3</sup> The output files from Gaussian 16 were analyzed with GaussSum.<sup>4</sup>

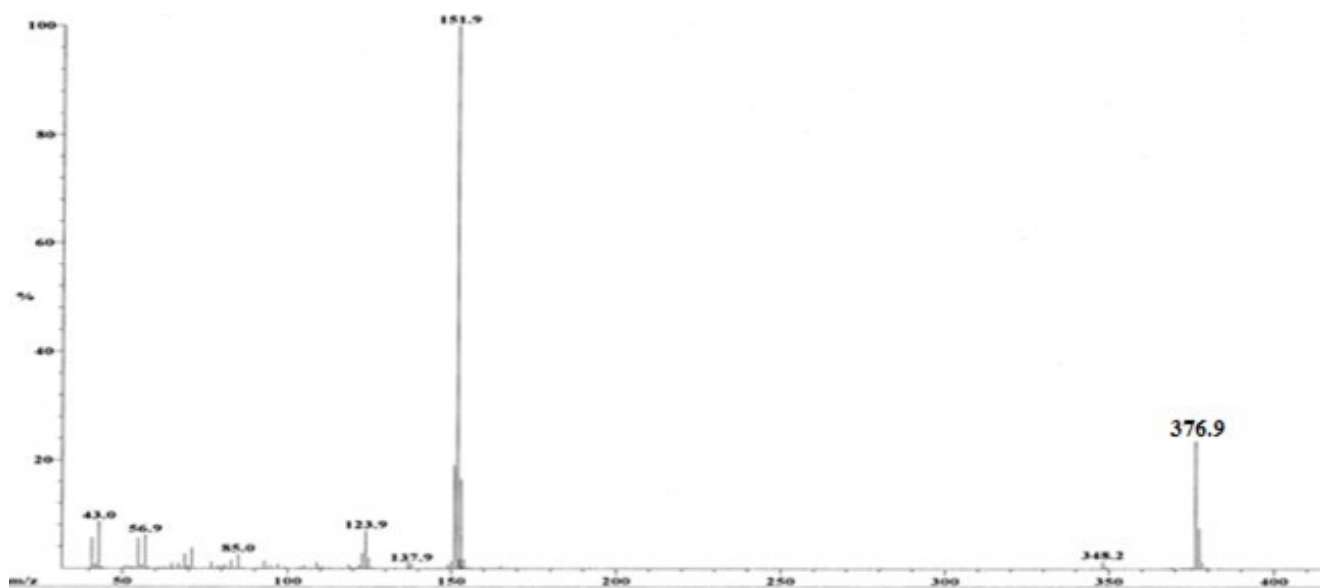

Figure S1. ESI-MS spectra of compound (a)

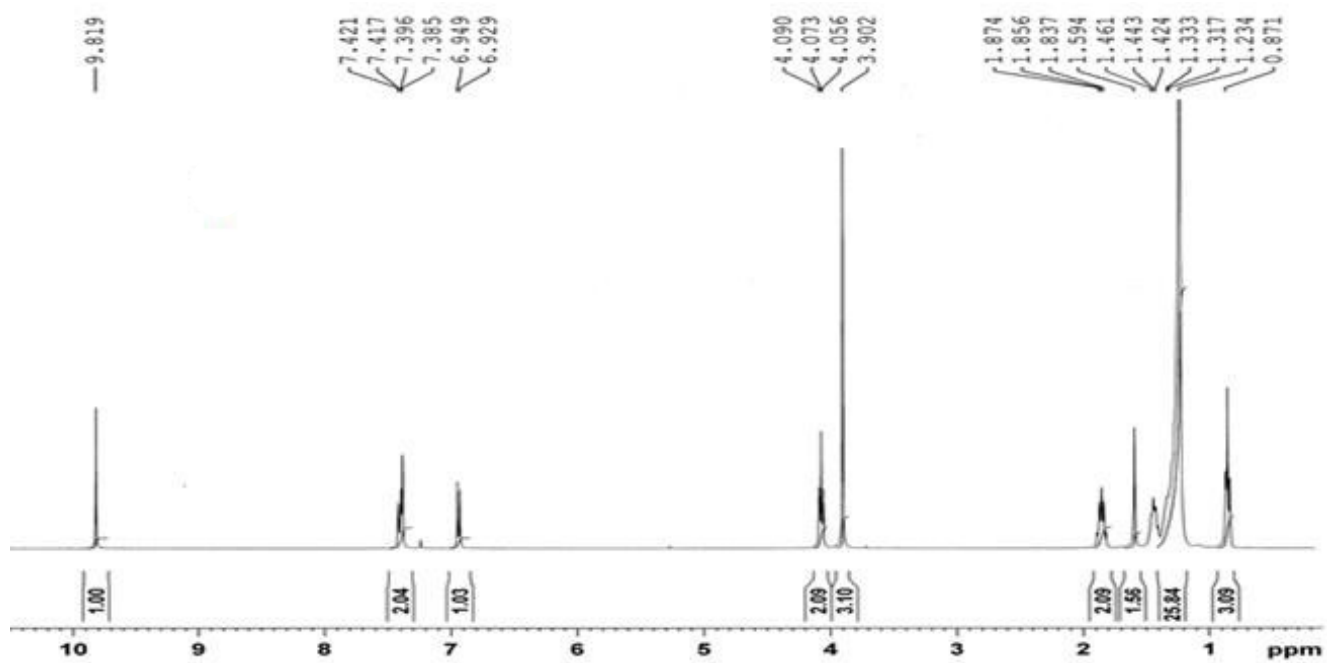

Figure S2. <sup>1</sup>H NMR spectra of compound (a)



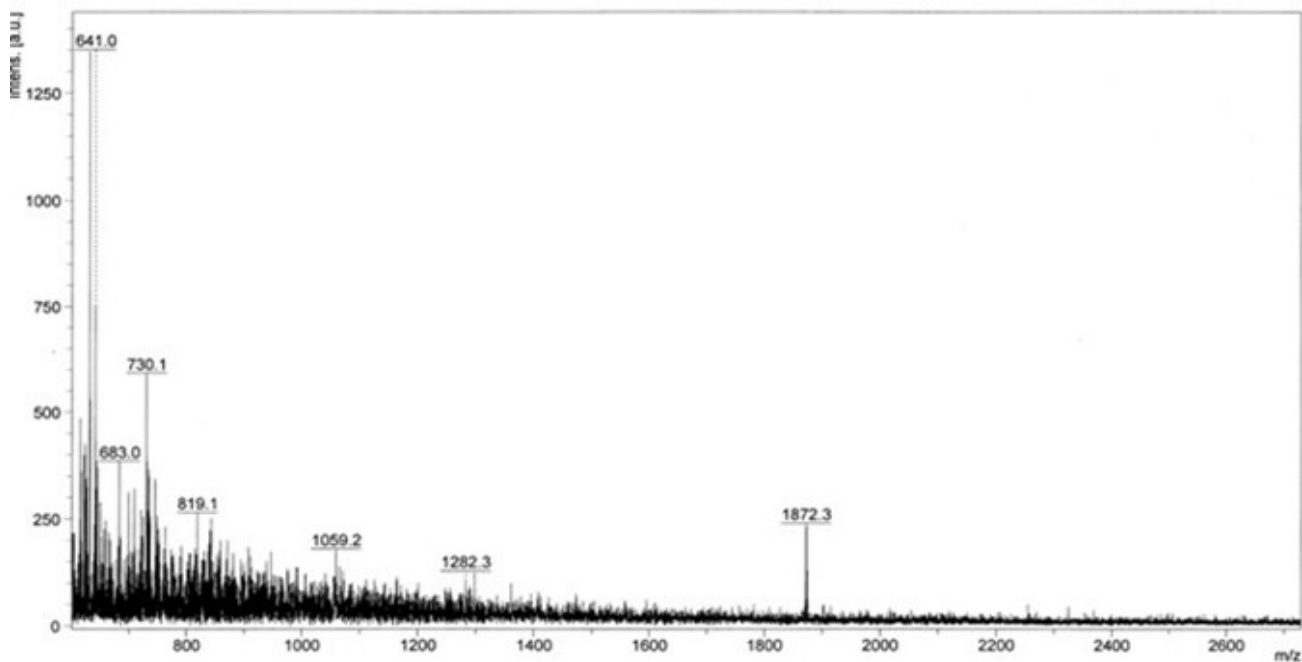

Figure S3. ESI-MS spectra of compound C1

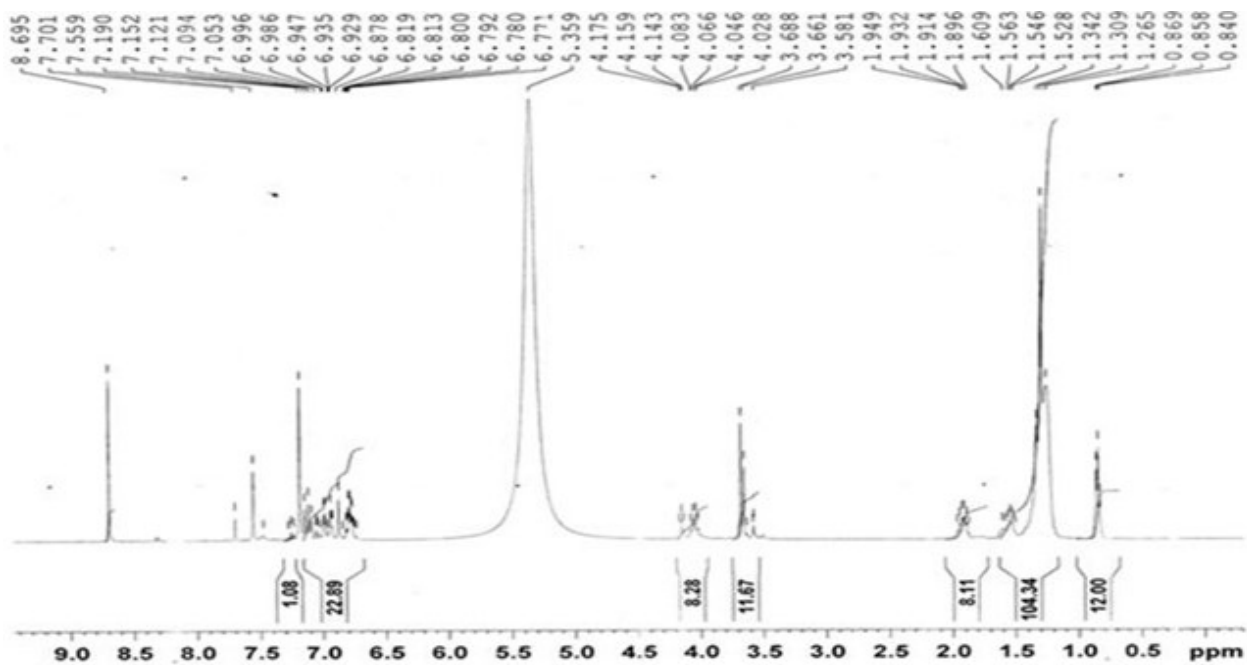

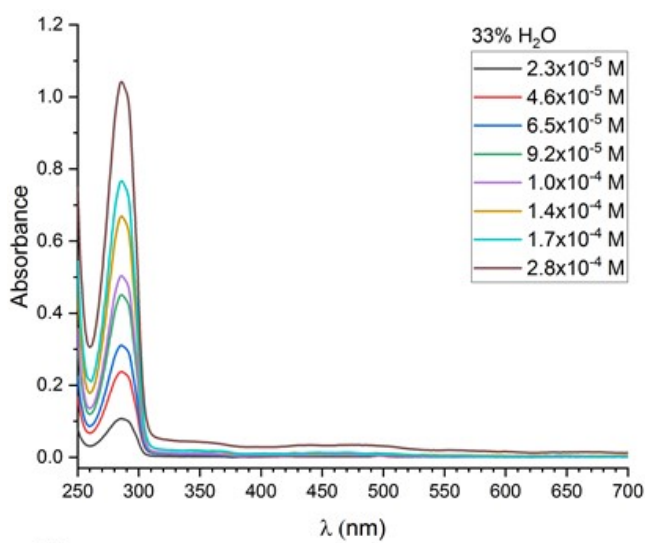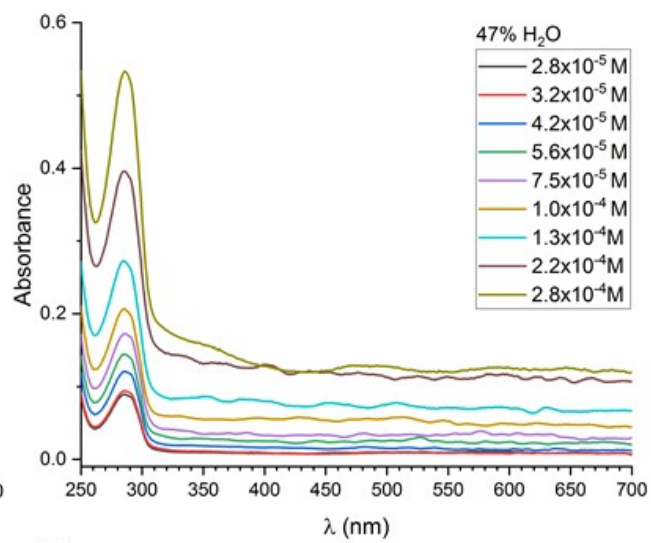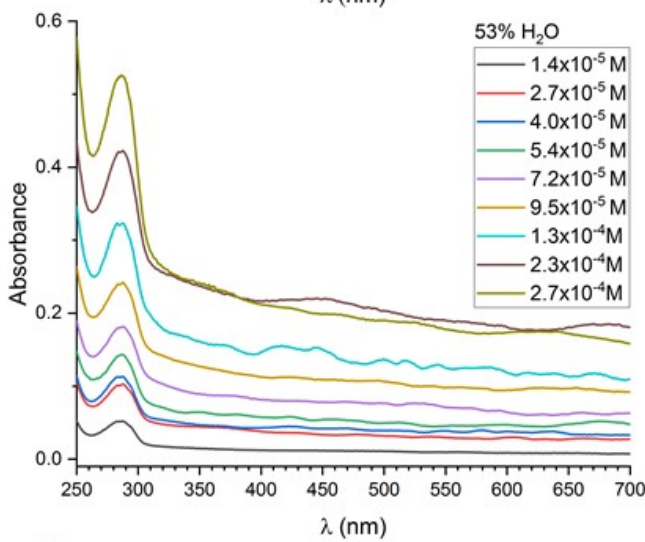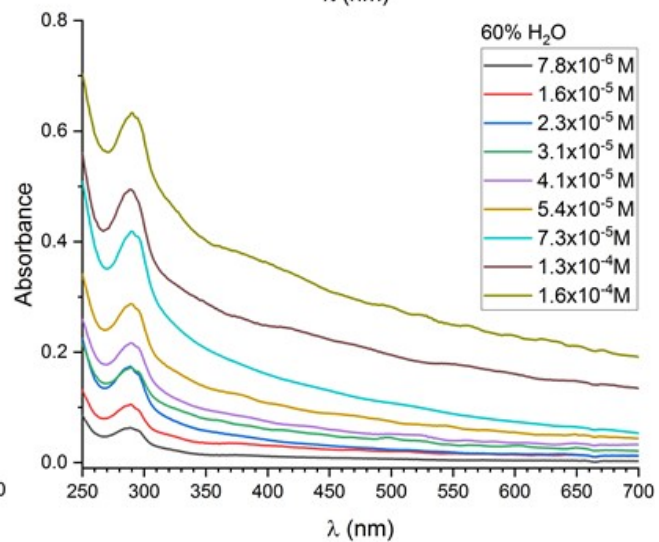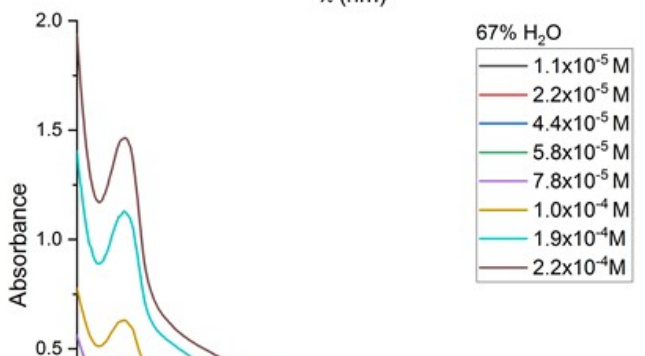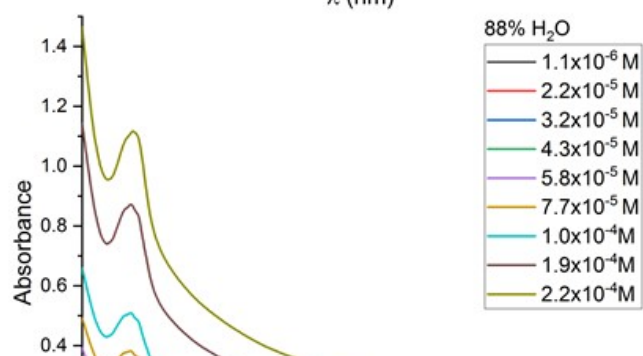

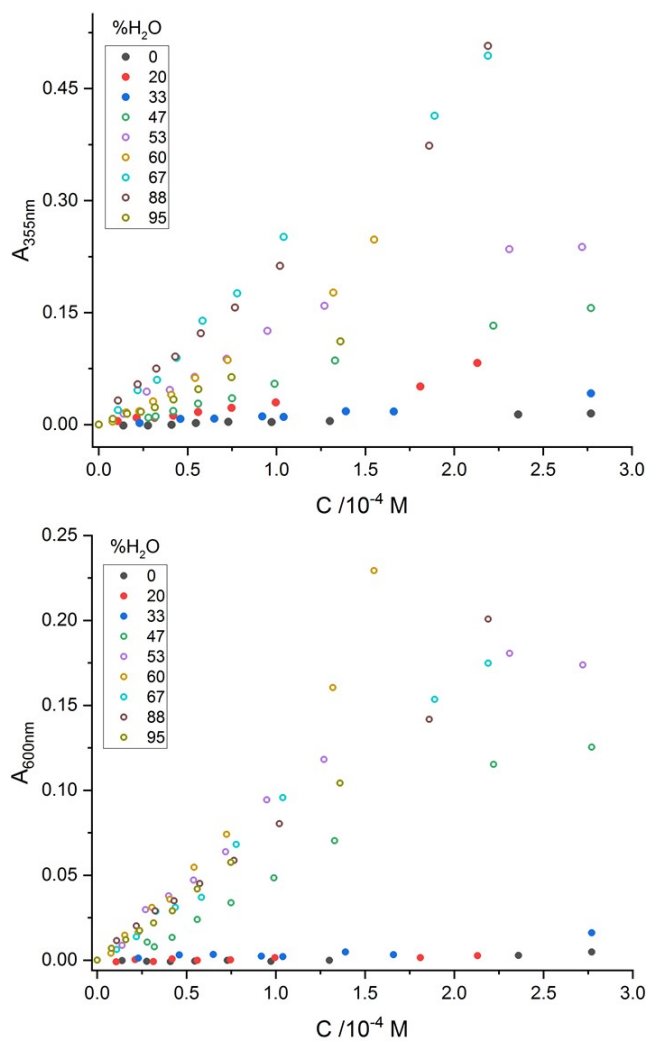

**Figure S6.** Absorbance vs. concentration of C1 at 355 and 600 nm.

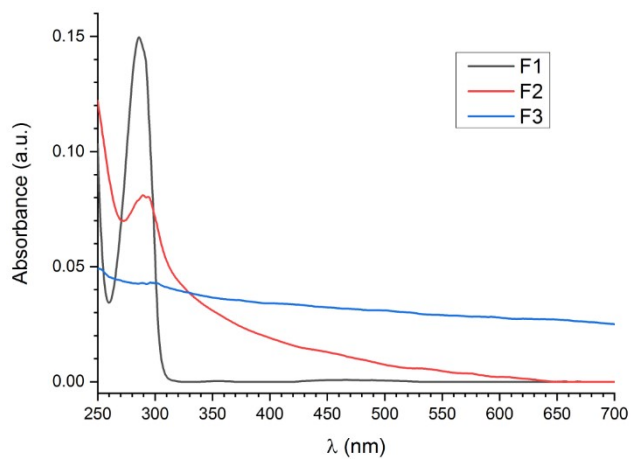

**Figure S7.** Spectral profiles of F1, F2 and F3.

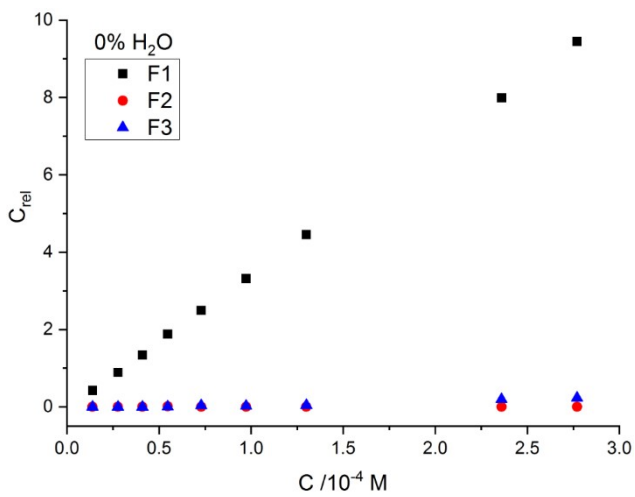

**Figure S8.** Relative concentrations of F1, F2 and F3 vs. total concentration of C1 in pure THF

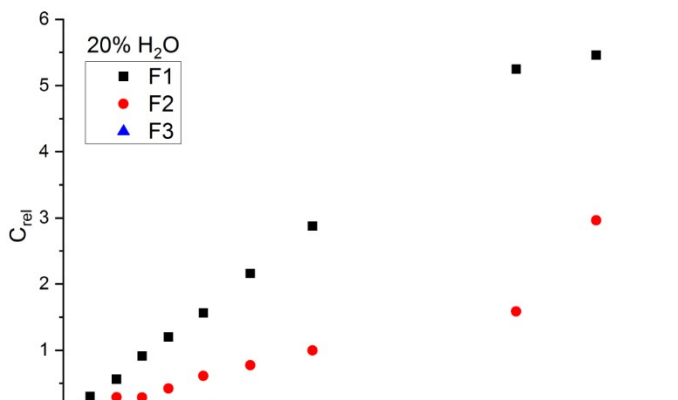

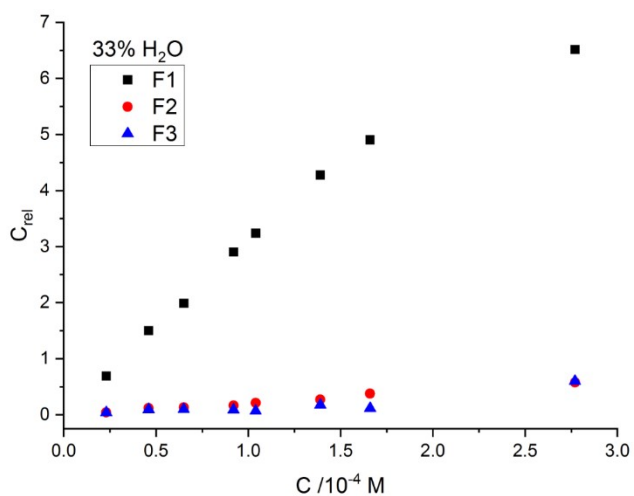

**Figure S10.** Relative concentrations of F1, F2 and F3 vs. total concentration of C1 in THF/H<sub>2</sub>O solution at 33% H<sub>2</sub>O

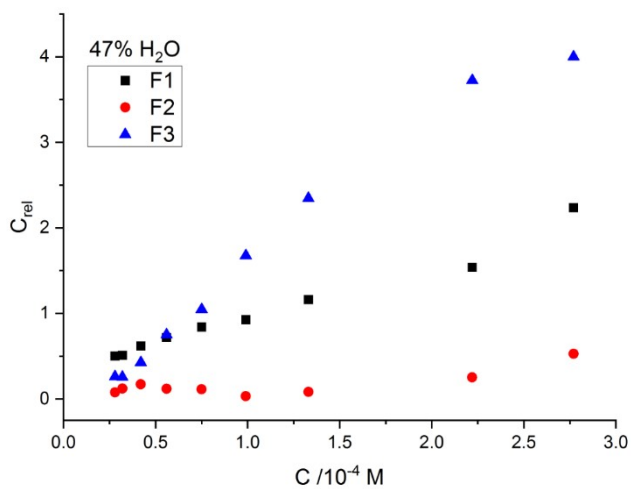

**Figure S11.** Relative concentrations of F1, F2 and F3 vs. total concentration of C1 in THF/H<sub>2</sub>O solution at 47% H<sub>2</sub>O

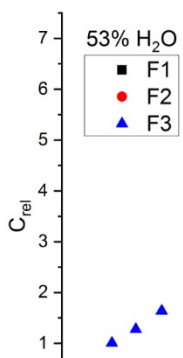

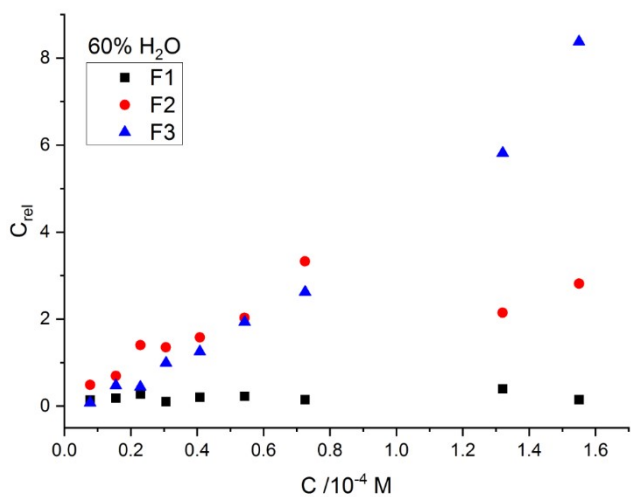

**Figure S13.** Relative concentrations of F1, F2 and F3 vs. total concentration of C1 in THF/H<sub>2</sub>O solution at 60% H<sub>2</sub>O

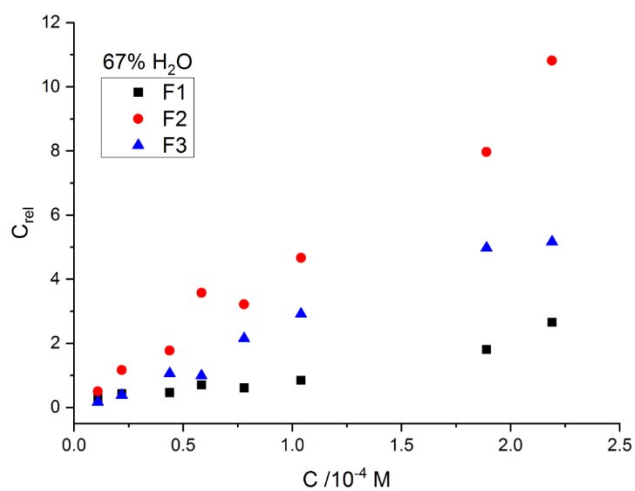

**Figure S14.** Relative concentrations of F1, F2 and F3 vs. total concentration of C1 in THF/H<sub>2</sub>O solution at 67% H<sub>2</sub>O

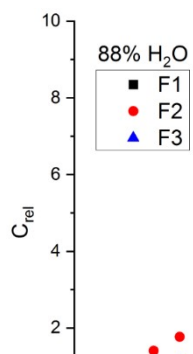

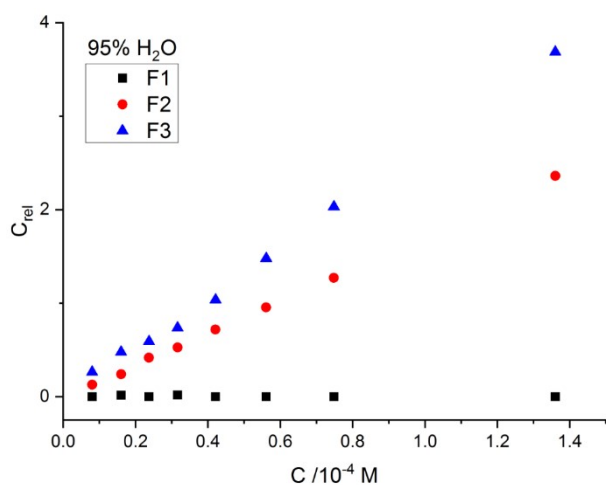

**Figure S16.** Relative concentrations of F1, F2 and F3 vs. total concentration of C1 in THF/H<sub>2</sub>O solution at 95% H<sub>2</sub>O

**Table S1.** DLS measurement of C1 in THF (47%) / H<sub>2</sub>O (53%)

| Measurement ID  | Measurement name | Pdl | Maximum of the distribution in Intensity (nm) |                   |
|-----------------|------------------|-----|-----------------------------------------------|-------------------|
|                 |                  |     | Peak 1                                        | Peak 2            |
| 1               | C153 1           | -   | 818.5                                         | 2.864             |
| 2               | C153 2           | -   | 867.9                                         | 2.922             |
| 3               | C153 3           | -   | 1133                                          | 2.894             |
| 4               | C153 4           | -   | 1100                                          | 2.899             |
| 5               | C153 5           | -   | 936.7                                         | 2.909             |
| 6               | C153 6           | -   | 1151                                          | 2.800             |
| Average ±SD (%) |                  | -   | 1001 ± 145 (94.4)                             | 2.88 ± 0.04 (5.3) |

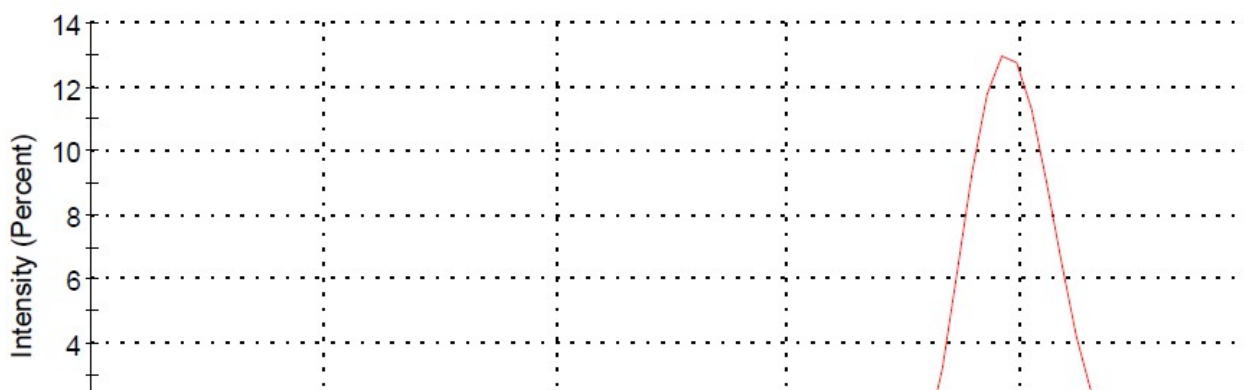

**Table S2.** DLS measurement of C1 in THF (5%) / H<sub>2</sub>O (95%)

| Measurement ID       | Measurement name | PdI ( $\pm$ SD) | Maximum of the distribution in Intensity (nm) |
|----------------------|------------------|-----------------|-----------------------------------------------|
|                      |                  |                 | Peak 1                                        |
| 1                    | C195 1           | 0.087           | 166.0                                         |
| 2                    | C195 2           | 0.081           | 164.6                                         |
| 3                    | C195 3           | 0.106           | 164.4                                         |
| 4                    | C195 4           | 0.119           | 170.2                                         |
| 5                    | C195 5           | 0.117           | 168.3                                         |
| 6                    | C195 6           | 0.104           | 165.2                                         |
| Average $\pm$ SD (%) |                  | 0.10 $\pm$ 0.01 | 166 $\pm$ 2 (100)                             |

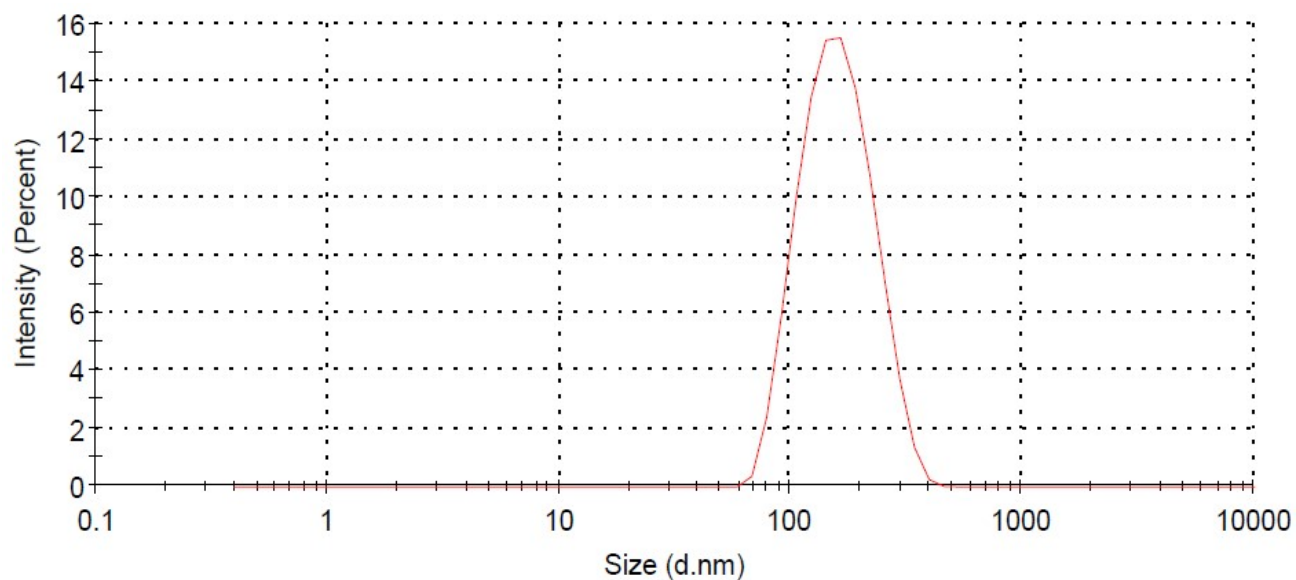

**Figure S18.** DLS average measurement of C1 in THF (5%) / H<sub>2</sub>O (95%)



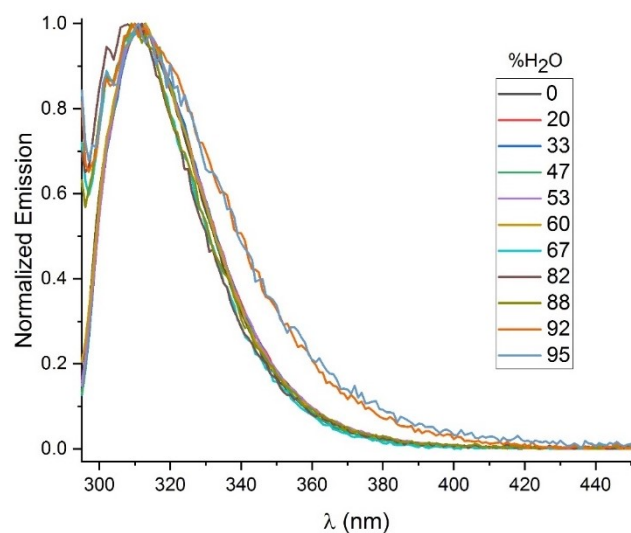

**Figure S19.** Normalized luminescence spectra of C1 in THF/H<sub>2</sub>O mixtures as a function of % H<sub>2</sub>O (v:v)

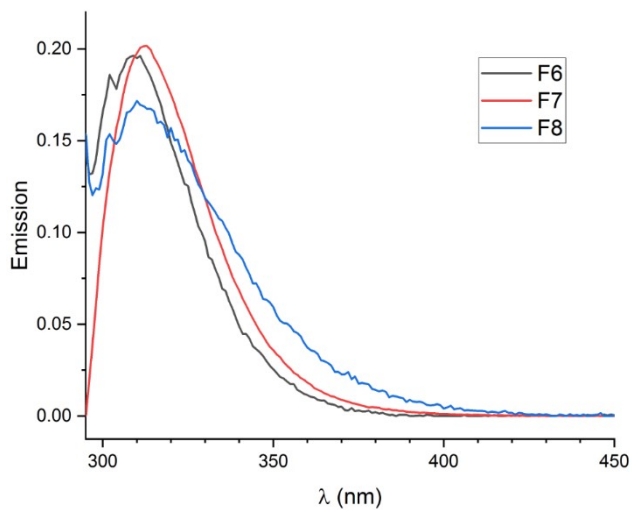

**Figure S20.** Spectral profiles of F6, F7 and F8

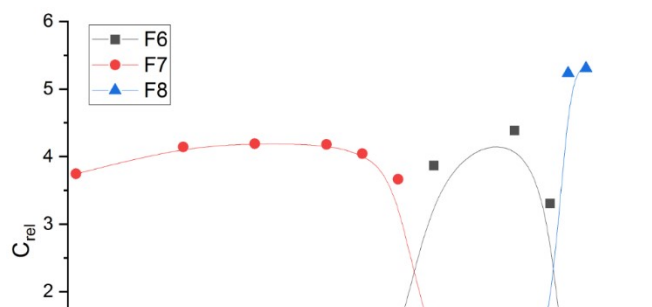

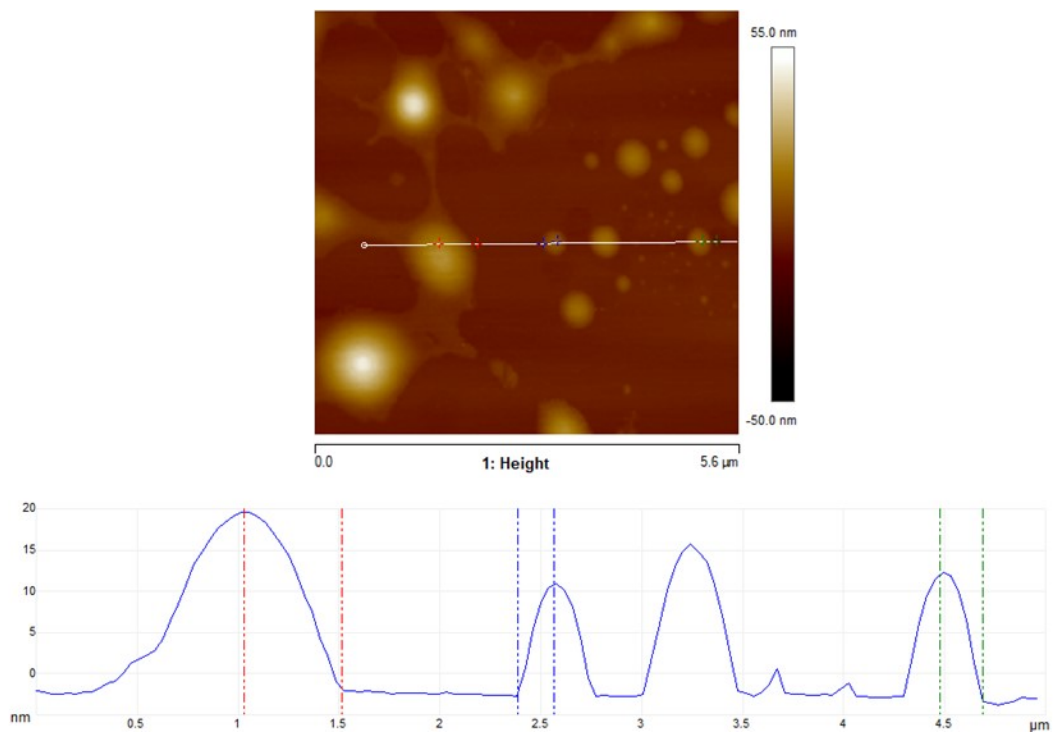

**Figure S22.** AFM images of C1 in pure THF.

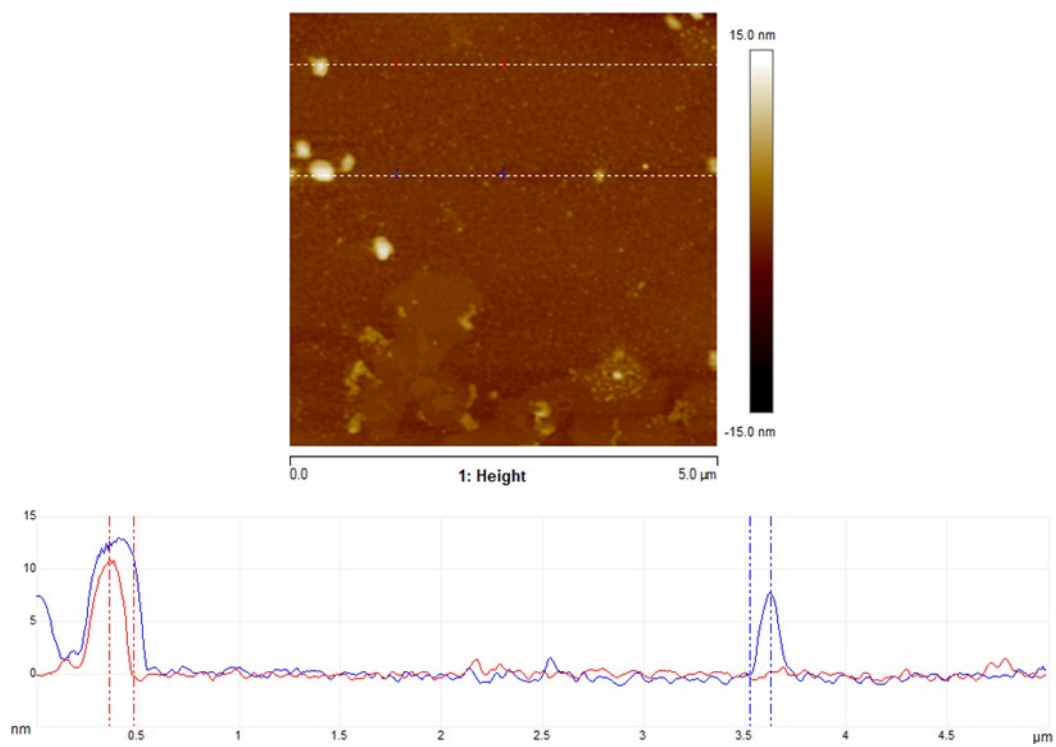

**Figure S23.** AFM images of C1 in THF (47%) / H<sub>2</sub>O (53%).

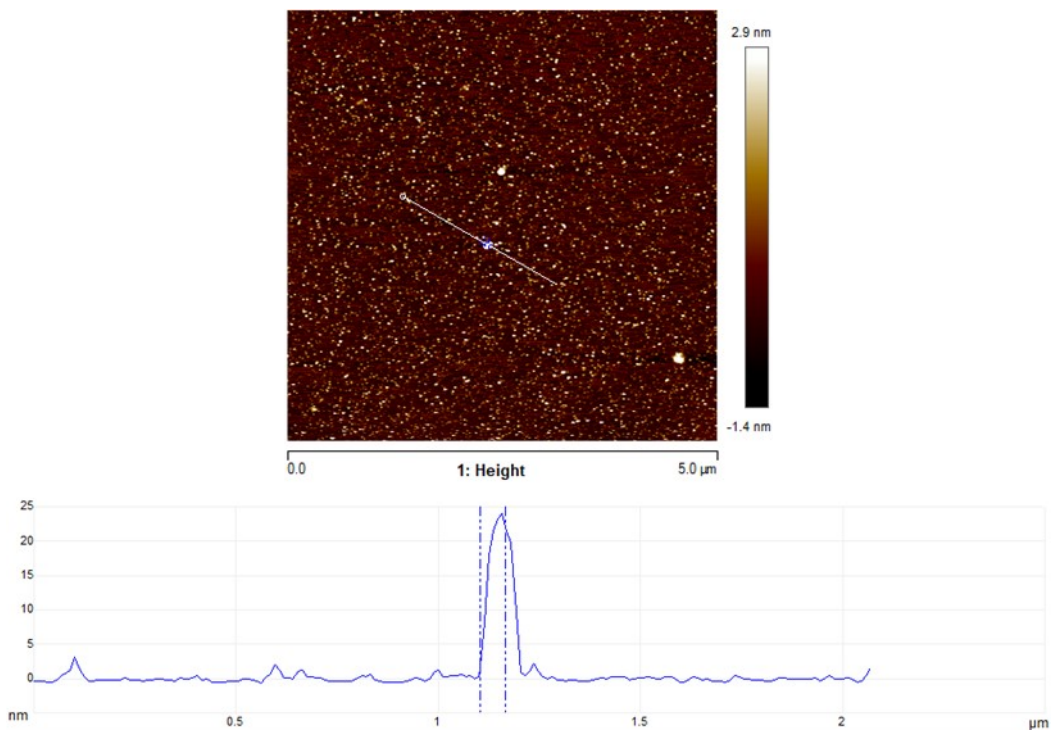

**Figure S24.** AFM images of C1 in THF (5%) / H<sub>2</sub>O (95%).

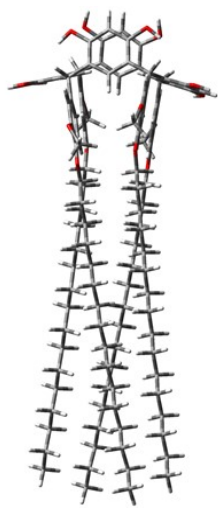

**C1-b**

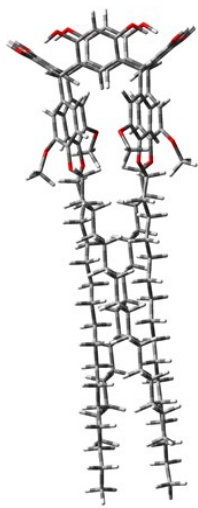

**C1-c**

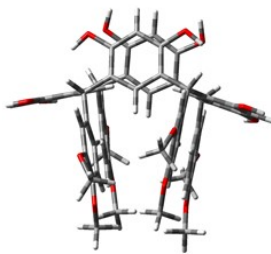

**Cr-b**

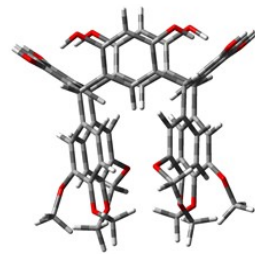

**Cr-c**

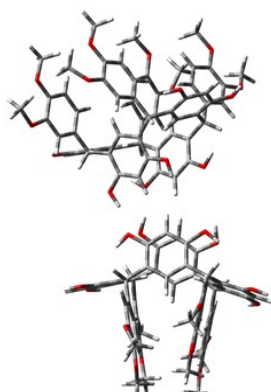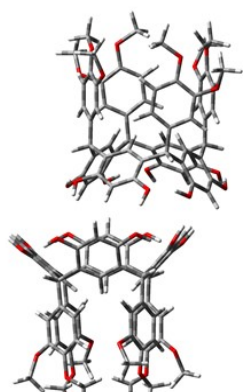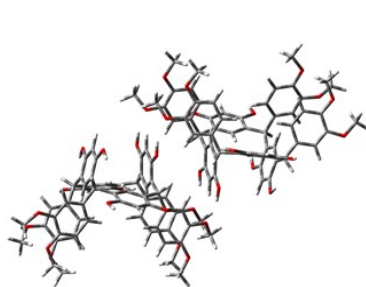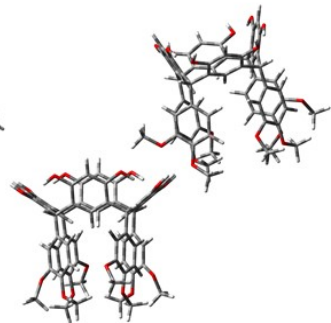

**Table S3.** Calculated electronic transitions for **C1-b** at the B3LYP/6-31G(d,p)/PCM(TFH) level of theory

| Transition n° | Wavelength (nm) | Energy (eV) | Osc. Strength | Major contribs                     | Minor contribs                                                                                                     |
|---------------|-----------------|-------------|---------------|------------------------------------|--------------------------------------------------------------------------------------------------------------------|
| 1             | 274.12          | 4.52        | 0.023         | H-1→LUMO (30%),<br>HOMO→LUMO (36%) | H-1→L+1 (8%),<br>HOMO→L+1 (9%)                                                                                     |
| 2             | 273.26          | 4.54        | 0.246         | H-1→LUMO (21%),<br>HOMO→L+1 (59%)  | H-3→L+1 (4%)                                                                                                       |
| 3             | 268.05          | 4.63        | 0.024         | H-2→LUMO (51%),<br>HOMO→LUMO (22%) | H-2→L+2 (3%), H-1→LUMO (4%), H-1→L+1 (6%),<br>HOMO→L+2 (3%)                                                        |
| 4             | 266.07          | 4.66        | 0.027         | H-3→LUMO (37%)                     | H-3→L+1 (4%), H-2→LUMO (5%), H-2→L+1 (4%), H-1→LUMO (7%), H-1→L+2 (6%),<br>HOMO→LUMO (8%), HOMO→L+1 (4%), HOMO→L+3 |

|    |        |      |       |                                                                    |                                                                                                                                                     |
|----|--------|------|-------|--------------------------------------------------------------------|-----------------------------------------------------------------------------------------------------------------------------------------------------|
|    |        |      |       |                                                                    | (7%), HOMO→L+4 (2%)                                                                                                                                 |
| 5  | 264.62 | 4.69 | 0.043 | H-1→LUMO (10%),<br>H-1→L+1 (43%)                                   | H-3→LUMO (3%),<br>H-3→L+1 (6%), H-2→L+1 (9%),<br>HOMO→L+1 (8%)                                                                                      |
| 6  | 263.14 | 4.71 | 0.019 | H-3→L+1 (24%), H-2→L+1 (28%)                                       | H-4→LUMO (7%),<br>H-3→LUMO (6%),<br>H-1→L+2 (8%),<br>HOMO→L+2 (3%),<br>HOMO→L+3 (5%),<br>HOMO→L+4 (3%)                                              |
| 7  | 262.98 | 4.71 | 0.010 | H-2→LUMO (25%),<br>HOMO→LUMO (16%)                                 | H-5→LUMO (3%),<br>H-4→LUMO (6%),<br>H-4→L+1 (5%), H-2→L+2 (4%),<br>H-1→LUMO (7%), H-1→L+1 (3%),<br>H-1→L+2 (4%),<br>HOMO→L+2 (6%),<br>HOMO→L+3 (3%) |
| 8  | 261.38 | 4.74 | 0.054 | H-2→L+1 (18%),<br>HOMO→L+3 (14%)                                   | H-5→LUMO (7%),<br>H-5→L+1 (7%), H-4→L+1 (7%),<br>H-3→LUMO (8%), H-1→L+3 (2%),<br>HOMO→LUMO (3%), HOMO→L+4 (7%)                                      |
| 9  | 259.90 | 4.77 | 0.027 | H-5→LUMO (18%),<br>H-3→LUMO (10%),<br>H-2→L+1 (14%), H-1→L+1 (19%) | H-4→LUMO (9%),<br>H-1→L+2 (9%),<br>HOMO→LUMO (4%)                                                                                                   |
| 10 | 258.91 | 4.79 | 0.053 | H-5→L+1 (34%), H-3→L+1 (19%)                                       | H-3→LUMO (7%),<br>H-3→L+4 (3%), H-2→L+1 (4%),<br>H-1→L+1 (6%), H-1→L+2 (3%)                                                                         |
| 11 | 257.78 | 4.81 | 0.038 | H-6→L+1 (10%),<br>HOMO→L+3 (21%)                                   | H-5→LUMO (2%),<br>H-5→L+1 (4%), H-4→L+1 (8%),<br>H-3→L+1 (5%), H-2→L+2 (2%),<br>H-2→L+3 (9%), H-1→L+3 (3%),<br>HOMO→L+1 (4%),<br>HOMO→L+2 (7%)      |
| 12 | 256.11 | 4.84 | 0.033 | H-4→LUMO (11%),<br>HOMO→L+2 (20%)                                  | H-6→L+1 (8%), H-3→L+1 (9%),<br>H-2→L+1 (3%), H-                                                                                                     |

|    |        |      |       |                                                              |                                                                                                                                                                                             |
|----|--------|------|-------|--------------------------------------------------------------|---------------------------------------------------------------------------------------------------------------------------------------------------------------------------------------------|
|    |        |      |       |                                                              | 2→L+3 (2%), H-1→L+2 (2%), H-1→L+3 (6%), HOMO→L+1 (4%), HOMO→L+4 (8%), HOMO→L+5 (2%), HOMO→L+7 (2%)                                                                                          |
| 13 | 255.61 | 4.85 | 0.006 | H-7→LUMO (19%)                                               | H-7→L+1 (2%), H-5→L+1 (3%), H-4→LUMO (4%), H-4→L+2 (7%), H-3→L+1 (6%), H-3→L+2 (4%), H-3→L+3 (3%), H-2→L+1 (3%), H-1→L+2 (6%), H-1→L+3 (5%), H-1→L+10 (2%), HOMO→L+3 (3%)                   |
| 14 | 255.34 | 4.86 | 0.022 | H-6→L+1 (10%), H-3→L+3 (13%), HOMO→L+2 (10%), HOMO→L+3 (13%) | H-5→L+1 (2%), H-4→LUMO (7%), H-3→L+2 (3%), H-1→L+3 (9%), HOMO→L+4 (5%)                                                                                                                      |
| 15 | 254.36 | 4.87 | 0.001 | H-5→LUMO (35%)                                               | H-7→LUMO (5%), H-4→L+1 (5%), H-4→L+2 (3%), H-3→LUMO (2%), H-2→L+3 (9%), H-1→L+2 (9%), HOMO→L+2 (5%), HOMO→L+3 (2%)                                                                          |
| 16 | 253.95 | 4.88 | 0.014 | H-1→L+2 (17%), H-1→L+4 (12%)                                 | H-7→LUMO (4%), H-5→LUMO (4%), H-4→LUMO (7%), H-4→L+1 (3%), H-3→LUMO (5%), H-3→L+1 (4%), H-3→L+3 (3%), H-2→L+1 (3%), H-2→L+3 (7%), H-1→LUMO (2%), H-1→L+3 (3%), HOMO→L+2 (4%), HOMO→L+7 (2%) |
| 17 | 253.30 | 4.89 | 0.009 | H-4→L+1 (29%), HOMO→L+4 (13%)                                | H-7→LUMO (2%), H-5→L+1 (4%), H-3→L+2 (3%), H-2→L+2 (4%), H-2→L+3 (5%), H-                                                                                                                   |



|    |        |      |       |                                                             |                                                                                                                                                                          |
|----|--------|------|-------|-------------------------------------------------------------|--------------------------------------------------------------------------------------------------------------------------------------------------------------------------|
|    |        |      |       |                                                             | 2→L+7 (2%), H-1→L+1 (3%), H-1→L+2 (4%), H-1→L+4 (3%), HOMO→L+7 (3%)                                                                                                      |
| 18 | 252.85 | 4.90 | 0.030 | H-6→L+1 (11%), H-5→L+1 (13%), H-1→L+3 (16%), HOMO→L+4 (10%) | H-7→LUMO (3%), H-6→LUMO (4%), H-4→L+3 (2%), H-3→L+4 (4%), H-1→L+4 (4%), HOMO→L+9 (3%)                                                                                    |
| 19 | 251.29 | 4.93 | 0.007 | H-4→LUMO (17%), H-1→L+4 (14%), HOMO→L+6 (14%)               | H-2→L+2 (2%), H-2→L+3 (7%), H-2→L+7 (2%), H-1→L+2 (6%), HOMO→L+2 (9%), HOMO→L+5 (3%), HOMO→L+7 (4%)                                                                      |
| 20 | 251.02 | 4.94 | 0.001 | H-1→L+3 (22%), H-1→L+4 (11%)                                | H-6→LUMO (5%), H-5→L+1 (8%), H-4→L+1 (3%), H-4→L+2 (3%), H-4→L+4 (2%), H-3→L+2 (2%), H-2→L+3 (5%), HOMO→L+4 (7%), HOMO→L+6 (8%), HOMO→L+7 (5%)                           |
| 21 | 250.69 | 4.95 | 0.018 | H-1→L+4 (14%), HOMO→L+5 (14%)                               | H-7→L+1 (4%), H-6→L+1 (2%), H-5→L+3 (7%), H-4→L+1 (6%), H-3→LUMO (3%), H-3→L+3 (3%), H-3→L+4 (3%), H-3→L+5 (6%), H-2→L+3 (4%), H-1→L+3 (4%), H-1→L+6 (4%), HOMO→L+4 (4%) |
| 22 | 249.94 | 4.96 | 0.007 | H-2→L+7 (12%)                                               | H-7→LUMO (3%), H-5→LUMO (5%), H-5→L+2 (4%), H-4→LUMO (6%), H-4→L+1 (4%), H-3→L+3 (3%), H-2→L+3 (5%), H-1→L+2 (6%), H-1→L+7 (3%), HOMO→L+2 (9%),                          |

|    |        |      |       |                                                     |                                                                                                                                                                                                      |
|----|--------|------|-------|-----------------------------------------------------|------------------------------------------------------------------------------------------------------------------------------------------------------------------------------------------------------|
|    |        |      |       |                                                     | HOMO→L+3 (4%),<br>HOMO→L+4 (3%),<br>HOMO→L+6 (3%),<br>HOMO→L+7 (6%)                                                                                                                                  |
| 23 | 249.24 | 4.97 | 0.004 | H-2→L+3 (19%),<br>HOMO→L+5 (11%),<br>HOMO→L+7 (15%) | H-6→L+1 (4%), H-5→L+1 (4%), H-4→L+1 (3%), H-3→L+1 (2%), H-3→L+3 (2%), H-3→L+5 (3%), H-1→L+3 (9%),<br>HOMO→L+6 (2%)                                                                                   |
| 24 | 248.43 | 4.99 | 0.018 | H-3→L+2 (23%), H-3→L+3 (15%),<br>HOMO→L+5 (19%)     | H-6→LUMO (8%),<br>H-6→L+1 (3%), H-5→L+3 (3%),<br>H-2→L+3 (3%)                                                                                                                                        |
| 25 | 248.23 | 4.99 | 0.026 | H-2→L+2 (22%),<br>HOMO→L+6 (14%),<br>HOMO→L+7 (13%) | H-6→L+1 (2%), H-3→L+2 (6%),<br>HOMO→L+2 (6%),<br>HOMO→L+3 (6%),<br>HOMO→L+4 (3%),<br>HOMO→L+5 (2%)                                                                                                   |
| 26 | 247.64 | 5.01 | 0.001 | H-6→LUMO (11%)                                      | H-6→L+1 (7%), H-4→L+1 (2%), H-3→L+2 (9%), H-3→L+3 (5%), H-3→L+4 (3%), H-2→L+1 (3%), H-2→L+4 (9%), H-2→L+7 (2%), H-1→L+7 (3%),<br>HOMO→L+4 (6%),<br>HOMO→L+5 (4%),<br>HOMO→L+7 (3%),<br>HOMO→L+9 (8%) |
| 27 | 247.02 | 5.02 | 0.005 | H-7→LUMO (10%),<br>H-2→L+2 (17%)                    | H-4→L+1 (3%), H-4→L+3 (4%), H-3→LUMO (3%), H-2→LUMO (3%), H-2→L+3 (3%), H-2→L+4 (5%), H-1→L+2 (2%), H-1→L+4 (4%),<br>HOMO→L+6 (8%),<br>HOMO→L+7 (5%),<br>HOMO→L+8 (3%),<br>HOMO→L+9 (3%)             |
| 28 | 246.78 | 5.02 | 0.014 | H-6→L+1 (10%), H-3→L+4 (13%),<br>H-2→L+4 (23%)      | H-7→LUMO (4%),<br>H-6→LUMO (2%),<br>H-4→L+2 (3%), H-                                                                                                                                                 |

|    |        |      |       |                                |                                                                                                                                                                                                                                                      |
|----|--------|------|-------|--------------------------------|------------------------------------------------------------------------------------------------------------------------------------------------------------------------------------------------------------------------------------------------------|
|    |        |      |       |                                | 1→L+5 (4%), H-1→L+6 (7%), HOMO→L+6 (2%), HOMO→L+9 (5%)                                                                                                                                                                                               |
| 29 | 245.89 | 5.04 | 0.013 | H-6→LUMO (13%), H-5→L+2 (14%)  | H-3→L+2 (9%), H-3→L+3 (2%), H-2→L+4 (2%), H-2→L+7 (4%), H-1→L+5 (5%), H-1→L+7 (8%), HOMO→L+6 (3%), HOMO→L+7 (9%), HOMO→L+9 (4%)                                                                                                                      |
| 30 | 245.46 | 5.05 | 0.016 | H-3→L+4 (10%)                  | H-7→LUMO (3%), H-7→L+1 (5%), H-5→LUMO (2%), H-5→L+2 (3%), H-5→L+4 (2%), H-4→L+2 (4%), H-4→L+3 (3%), H-3→L+2 (3%), H-3→L+5 (3%), H-3→L+6 (4%), H-1→L+6 (6%), H-1→L+10 (2%), HOMO→L+4 (4%), HOMO→L+5 (7%), HOMO→L+6 (7%), HOMO→L+7 (4%), HOMO→L+9 (4%) |
| 31 | 244.88 | 5.06 | 0.005 | H-6→LUMO (11%), HOMO→L+9 (11%) | H-6→L+1 (3%), H-3→L+3 (8%), H-3→L+6 (6%), H-3→L+7 (3%), H-2→L+4 (5%), H-2→L+6 (3%), H-2→L+7 (5%), H-1→L+6 (5%), H-1→L+9 (2%), HOMO→L+6 (4%), HOMO→L+7 (2%), HOMO→L+10 (3%)                                                                           |
| 32 | 244.82 | 5.06 | 0.007 | H-2→L+2 (15%), H-2→L+4 (22%)   | H-7→LUMO (4%), H-7→L+1 (2%), H-6→LUMO (3%), H-5→L+3 (7%), H-3→L+2 (3%), H-2→L+3 (4%), H-2→L+7 (3%), H-1→L+6 (4%), H-                                                                                                                                 |

|    |        |      |       |                              |                                                                                                                                                                                                       |
|----|--------|------|-------|------------------------------|-------------------------------------------------------------------------------------------------------------------------------------------------------------------------------------------------------|
|    |        |      |       |                              | 1→L+7 (7%)                                                                                                                                                                                            |
| 33 | 244.49 | 5.07 | 0.010 | H-7→L+1 (14%), H-1→L+7 (23%) | H-7→LUMO (9%), H-4→L+4 (2%), H-3→L+4 (4%), H-2→L+7 (2%), H-1→L+4 (4%), H-1→L+6 (4%), H-1→L+8 (4%), HOMO→L+8 (5%)                                                                                      |
| 34 | 243.66 | 5.09 | 0.025 | H-5→L+4 (11%)                | H-5→L+3 (5%), H-4→L+2 (8%), H-3→L+4 (3%), H-3→L+5 (2%), H-2→L+6 (4%), H-2→L+7 (2%), H-1→L+4 (3%), H-1→L+5 (3%), H-1→L+8 (6%), HOMO→L+5 (2%), HOMO→L+6 (7%), HOMO→L+8 (8%)                             |
| 35 | 243.07 | 5.10 | 0.001 | HOMO→L+8 (11%)               | H-7→L+1 (7%), H-5→L+4 (3%), H-4→L+3 (6%), H-3→L+3 (6%), H-3→L+4 (9%), H-3→L+6 (2%), H-3→L+7 (3%), H-2→L+7 (8%), H-2→L+8 (5%), H-1→L+5 (6%), H-1→L+7 (4%), HOMO→L+6 (2%), HOMO→L+7 (3%), HOMO→L+9 (3%) |
| 36 | 242.71 | 5.11 | 0.007 | H-1→L+5 (27%)                | H-7→LUMO (7%), H-7→L+1 (8%), H-5→L+2 (5%), H-4→L+1 (2%), H-4→L+2 (3%), H-4→L+4 (2%), H-3→L+4 (3%), H-2→L+4 (3%), H-2→L+7 (4%), H-1→L+4 (2%), H-1→L+6 (3%), H-1→L+7 (2%), H-1→L+10 (2%)                |

|    |        |      |       |                              |                                                                                                                                                                                           |
|----|--------|------|-------|------------------------------|-------------------------------------------------------------------------------------------------------------------------------------------------------------------------------------------|
| 37 | 242.04 | 5.12 | 0.013 | H-4→L+3 (10%), H-1→L+6 (15%) | H-5→L+2 (3%), H-5→L+6 (3%), H-4→L+2 (2%), H-4→L+4 (3%), H-4→L+5 (2%), H-3→L+4 (3%), H-3→L+6 (9%), H-2→L+6 (5%), H-1→L+7 (2%), HOMO→L+8 (5%), HOMO→L+9 (4%)                                |
| 38 | 241.83 | 5.13 | 0.011 | H-4→L+2 (10%)                | H-7→L+1 (6%), H-7→L+2 (6%), H-5→L+2 (8%), H-5→L+3 (9%), H-5→L+4 (3%), H-4→L+3 (7%), H-4→L+5 (3%), H-4→L+6 (3%), H-2→L+7 (3%), H-1→L+5 (3%), H-1→L+6 (7%), H-1→L+7 (3%), HOMO→L+8 (5%)     |
| 39 | 241.46 | 5.13 | 0.017 | H-7→L+1 (11%), H-3→L+5 (11%) | H-6→LUMO (2%), H-6→L+1 (2%), H-5→L+4 (3%), H-5→L+5 (9%), H-5→L+7 (2%), H-4→L+3 (6%), H-3→L+3 (5%), H-3→L+7 (4%), H-2→L+7 (3%), H-1→L+5 (2%), H-1→L+7 (5%), H-1→L+8 (4%), HOMO→L+9 (2%)    |
| 40 | 241.32 | 5.14 | 0.013 | H-5→L+3 (10%), H-4→L+3 (10%) | H-7→L+2 (2%), H-7→L+4 (2%), H-6→L+4 (3%), H-5→L+4 (2%), H-4→L+4 (4%), H-3→L+4 (4%), H-3→L+6 (2%), H-2→L+8 (3%), H-1→L+7 (6%), H-1→L+10 (5%), HOMO→L+8 (3%), HOMO→L+9 (7%), HOMO→L+10 (3%) |

**Table S4.** Calculated electronic transitions for **C1-c** at the B3LYP/6-31G(d,p)/PCM(TFH) level of theory

| Transition n° | Wavelength (nm) | Energy (eV) | Osc. Strength | Major contribs                                                         | Minor contribs                                                       |
|---------------|-----------------|-------------|---------------|------------------------------------------------------------------------|----------------------------------------------------------------------|
| 1             | 296.78          | 4.18        | 0.000         | HOMO→LUMO (95%)                                                        | -                                                                    |
| 2             | 287.90          | 4.31        | 0.024         | H-1→LUMO (55%),<br>HOMO→L+1 (41%)                                      | -                                                                    |
| 3             | 287.28          | 4.32        | 0.031         | H-1→LUMO (39%),<br>HOMO→L+1 (54%)                                      | H-3→LUMO (3%)                                                        |
| 4             | 280.21          | 4.42        | 0.014         | H-1→L+1 (90%)                                                          | H-2→LUMO (8%)                                                        |
| 5             | 278.53          | 4.45        | 0.081         | H-1→L+3 (16%),<br>HOMO→L+2 (74%)                                       | -                                                                    |
| 6             | 278.50          | 4.45        | 0.001         | H-1→L+2 (32%),<br>HOMO→L+3 (56%)                                       | -                                                                    |
| 7             | 274.12          | 4.52        | 0.000         | H-3→L+1 (15%), H-<br>2→LUMO (73%)                                      | H-1→L+1 (5%)                                                         |
| 8             | 273.90          | 4.53        | 0.002         | H-3→LUMO (76%),<br>H-2→L+1 (18%)                                       | -                                                                    |
| 9             | 267.00          | 4.64        | 0.001         | H-1→L+2 (51%),<br>HOMO→L+3 (31%)                                       | H-5→LUMO (4%),<br>H-1→L+5 (6%)                                       |
| 10            | 266.71          | 4.65        | 0.041         | H-4→LUMO (33%),<br>H-2→L+1 (38%)                                       | H-5→L+1 (5%), H-<br>3→LUMO (9%), H-<br>2→L+2 (2%)                    |
| 11            | 266.10          | 4.66        | 0.028         | H-5→LUMO (32%),<br>H-3→L+1 (38%)                                       | H-4→L+1 (8%), H-<br>2→LUMO (5%),<br>HOMO→L+3 (4%)                    |
| 12            | 265.27          | 4.67        | 0.025         | H-1→L+3 (70%),<br>HOMO→L+2 (17%)                                       | HOMO→L+5 (7%)                                                        |
| 13            | 262.99          | 4.71        | 0.018         | H-3→L+2 (43%), H-<br>2→L+3 (35%)                                       | H-5→LUMO (6%),<br>HOMO→L+4 (3%)                                      |
| 14            | 262.88          | 4.72        | 0.022         | H-3→L+3 (21%), H-<br>2→L+1 (14%), H-<br>2→L+2 (32%)                    | H-6→LUMO (4%),<br>H-5→L+1 (4%), H-<br>4→LUMO (5%), H-<br>3→LUMO (6%) |
| 15            | 262.42          | 4.72        | 0.008         | H-4→LUMO (28%),<br>H-3→L+3 (13%), H-<br>2→L+1 (15%), H-<br>2→L+2 (17%) | H-5→L+1 (9%), H-<br>3→LUMO (2%)                                      |
| 16            | 262.41          | 4.72        | 0.004         | H-5→LUMO (28%),<br>H-3→L+1 (39%)                                       | H-6→L+1 (3%), H-<br>4→L+1 (5%), H-<br>2→LUMO (7%)                    |
| 17            | 258.20          | 4.80        | 0.083         | HOMO→L+5 (82%)                                                         | H-1→L+3 (5%),<br>HOMO→L+2 (4%)                                       |

|    |        |      |       |                                                                        |                                                                                                                          |
|----|--------|------|-------|------------------------------------------------------------------------|--------------------------------------------------------------------------------------------------------------------------|
| 18 | 258.19 | 4.80 | 0.014 | H-6→LUMO (38%),<br>H-2→L+1 (10%), H-<br>1→L+4 (11%)                    | H-9→L+1 (4%), H-<br>8→LUMO (2%), H-<br>5→L+1 (9%), H-<br>5→L+2 (2%), H-<br>4→LUMO (5%), H-<br>4→L+3 (3%)                 |
| 19 | 257.50 | 4.81 | 0.004 | HOMO→L+4 (81%)                                                         | H-5→L+3 (3%), H-<br>4→L+2 (3%), H-<br>2→L+3 (4%)                                                                         |
| 20 | 256.94 | 4.83 | 0.050 | H-5→L+3 (30%), H-<br>4→L+2 (33%)                                       | H-5→LUMO (7%),<br>H-3→L+2 (2%), H-<br>1→L+5 (3%),<br>HOMO→L+4 (8%)                                                       |
| 21 | 256.56 | 4.83 | 0.016 | H-5→L+2 (35%), H-<br>4→L+3 (33%)                                       | H-4→LUMO (9%),<br>H-1→L+6 (2%)                                                                                           |
| 22 | 256.20 | 4.84 | 0.002 | H-6→L+1 (10%), H-<br>4→L+1 (12%), H-<br>2→L+3 (13%), H-<br>1→L+5 (32%) | H-9→LUMO (6%),<br>H-7→LUMO (3%),<br>H-3→L+2 (2%), H-<br>1→L+2 (5%)                                                       |
| 23 | 254.41 | 4.87 | 0.000 | H-4→L+1 (32%), H-<br>3→L+2 (17%), H-<br>2→L+3 (17%)                    | H-7→LUMO (3%),<br>H-6→L+1 (6%), H-<br>5→LUMO (3%), H-<br>4→L+2 (2%), H-<br>1→L+5 (5%),<br>HOMO→L+6 (4%)                  |
| 24 | 254.31 | 4.88 | 0.000 | H-3→L+3 (55%), H-<br>2→L+2 (40%)                                       | -                                                                                                                        |
| 25 | 253.96 | 4.88 | 0.000 | H-3→L+2 (22%), H-<br>2→L+3 (22%), H-<br>1→L+5 (26%),<br>HOMO→L+6 (11%) | H-4→L+1 (6%),<br>HOMO→L+8 (2%)                                                                                           |
| 26 | 252.80 | 4.90 | 0.050 | H-5→L+1 (26%), H-<br>1→L+4 (58%)                                       | H-6→LUMO (2%),<br>H-4→LUMO (5%)                                                                                          |
| 27 | 251.80 | 4.92 | 0.041 | H-6→LUMO (31%),<br>H-5→L+1 (32%), H-<br>1→L+4 (13%)                    | H-4→LUMO (7%),<br>H-1→L+6 (2%),<br>HOMO→L+7 (3%)                                                                         |
| 28 | 251.50 | 4.93 | 0.003 | H-5→LUMO (10%),<br>H-4→L+1 (24%),<br>HOMO→L+6 (34%)                    | H-9→LUMO (3%),<br>H-7→LUMO (3%),<br>H-6→L+1 (7%), H-<br>3→L+2 (3%), H-<br>1→L+7 (6%)                                     |
| 29 | 250.85 | 4.94 | 0.003 | H-6→L+1 (19%), H-<br>1→L+5 (12%),<br>HOMO→L+6 (15%)                    | H-9→LUMO (7%),<br>H-7→LUMO (5%),<br>H-5→LUMO (5%),<br>H-4→L+1 (5%), H-<br>4→L+2 (3%), H-<br>2→L+4 (2%), H-<br>1→L+7 (5%) |

|    |        |      |       |                                                                    |                                                                                                                                  |
|----|--------|------|-------|--------------------------------------------------------------------|----------------------------------------------------------------------------------------------------------------------------------|
| 30 | 250.42 | 4.95 | 0.012 | H-1→L+6 (26%),<br>HOMO→L+7 (28%)                                   | H-5→L+1 (7%), H-4→L+3 (2%), H-3→L+3 (3%), H-3→L+4 (3%), H-3→L+6 (3%), H-2→L+5 (2%), H-2→L+7 (6%)                                 |
| 31 | 248.18 | 5.00 | 0.001 | H-7→LUMO (69%)                                                     | H-9→LUMO (4%), H-6→L+1 (7%), H-3→L+5 (2%), H-2→L+6 (3%), HOMO→L+6 (3%)                                                           |
| 32 | 247.21 | 5.02 | 0.036 | H-7→LUMO (12%),<br>H-3→L+7 (10%), H-2→L+6 (13%),<br>HOMO→L+6 (13%) | H-6→L+1 (5%), H-3→L+5 (7%), H-2→L+4 (8%), H-2→L+11 (2%), H-1→L+9 (3%), HOMO→L+8 (9%)                                             |
| 33 | 246.94 | 5.02 | 0.004 | H-3→L+4 (11%), H-2→L+5 (13%),<br>HOMO→L+7 (14%),<br>HOMO→L+9 (10%) | H-9→L+1 (2%), H-8→LUMO (7%), H-6→LUMO (4%), H-5→L+2 (3%), H-3→L+6 (8%), H-2→L+7 (7%), H-1→L+6 (4%), H-1→L+8 (4%)                 |
| 34 | 245.62 | 5.05 | 0.007 | HOMO→L+8 (40%)                                                     | H-6→L+2 (3%), H-5→L+3 (3%), H-2→L+4 (6%), H-2→L+6 (4%), H-1→L+5 (5%), H-1→L+7 (4%), H-1→L+10 (7%), HOMO→L+6 (4%), HOMO→L+11 (6%) |
| 35 | 245.34 | 5.05 | 0.007 | HOMO→L+7 (13%),<br>HOMO→L+9 (30%)                                  | H-8→LUMO (3%), H-7→L+1 (2%), H-5→L+2 (9%), H-3→L+4 (8%), H-1→L+6 (8%), H-1→L+11 (7%), HOMO→L+10 (5%)                             |
| 36 | 244.96 | 5.06 | 0.023 | H-8→LUMO (15%),<br>H-7→L+1 (13%), H-5→L+2 (17%),<br>H-4→L+3 (10%)  | H-9→L+1 (2%), H-6→LUMO (3%), H-3→L+6 (6%), H-2→L+5 (3%), H-2→L+7 (7%), H-1→L+8 (2%), HOMO→L+7 (5%), HOMO→L+9 (4%)                |



|    |        |      |       |                                                              |                                                                                                     |
|----|--------|------|-------|--------------------------------------------------------------|-----------------------------------------------------------------------------------------------------|
| 37 | 244.72 | 5.07 | 0.001 | H-5→L+3 (25%), H-4→L+2 (39%)                                 | H-6→L+1 (7%), H-4→L+5 (4%), H-2→L+4 (3%), HOMO→L+8 (8%)                                             |
| 38 | 244.32 | 5.07 | 0.010 | H-3→L+5 (41%), H-2→L+4 (18%), HOMO→L+8 (10%)                 | H-6→L+1 (3%), H-5→L+3 (2%), H-4→L+2 (4%), H-2→L+6 (4%), H-1→L+7 (3%), H-1→L+9 (3%), HOMO→L+11 (3%)  |
| 39 | 244.27 | 5.08 | 0.034 | H-8→LUMO (11%), H-7→L+1 (14%), H-2→L+5 (23%), HOMO→L+9 (12%) | H-5→L+2 (6%), H-4→L+3 (8%), H-1→L+8 (6%), HOMO→L+7 (5%), HOMO→L+10 (3%)                             |
| 40 | 243.77 | 5.09 | 0.000 | H-5→L+2 (10%), H-4→L+3 (21%), H-2→L+5 (22%)                  | H-3→L+4 (9%), H-3→L+6 (5%), H-2→L+7 (3%), H-1→L+6 (5%), H-1→L+8 (2%), HOMO→L+7 (7%), HOMO→L+10 (9%) |

**Table S5.** Calculated electronic transitions for **Cr-b** at the B3LYP/6-31G(d,p)/PCM(TFH) level of theory

| Transition n° | Wavelength (nm) | Energy (eV) | Osc. Strength | Major contribs                  | Minor contribs                                                                           |
|---------------|-----------------|-------------|---------------|---------------------------------|------------------------------------------------------------------------------------------|
| 1             | 274.12          | 4.52        | 0.012         | H-1→LUMO (29%), HOMO→LUMO (36%) | H-1→L+1 (9%), HOMO→L+1 (9%)                                                              |
| 2             | 273.07          | 4.54        | 0.249         | H-1→LUMO (27%), HOMO→L+1 (50%)  | H-3→L+1 (3%)                                                                             |
| 3             | 268.60          | 4.62        | 0.029         | H-2→LUMO (49%), HOMO→LUMO (25%) | H-2→L+2 (3%), H-1→L+1 (4%), HOMO→L+1 (5%), HOMO→L+2 (3%)                                 |
| 4             | 266.25          | 4.66        | 0.031         | H-3→LUMO (36%), H-2→LUMO (15%)  | H-4→LUMO (2%), H-1→LUMO (4%), H-1→L+2 (5%), HOMO→LUMO (7%), HOMO→L+1 (7%), HOMO→L+3 (5%) |
| 5             | 264.44          | 4.69        | 0.019         | H-1→LUMO (19%), H-1→L+1 (37%)   | H-4→L+1 (2%), H-3→LUMO (5%), H-3→L+1 (4%), H-2→L+1 (3%),                                 |

|    |        |      |       |                                                                             |                                                                                                                                     |
|----|--------|------|-------|-----------------------------------------------------------------------------|-------------------------------------------------------------------------------------------------------------------------------------|
|    |        |      |       |                                                                             | HOMO→LUMO (4%), HOMO→L+1 (8%)                                                                                                       |
| 6  | 263.12 | 4.71 | 0.002 | H-2→LUMO (13%), H-2→L+1 (20%), H-1→L+1 (11%), HOMO→LUMO (12%)               | H-4→L+1 (5%), H-3→L+1 (5%), H-1→LUMO (2%), HOMO→L+2 (7%), HOMO→L+3 (5%), HOMO→L+4 (2%)                                              |
| 7  | 262.50 | 4.72 | 0.024 | H-4→LUMO (14%), H-3→L+1 (15%), H-2→L+1 (15%), H-1→L+2 (14%)                 | H-5→LUMO (3%), H-4→L+1 (2%), H-3→LUMO (3%), H-2→LUMO (4%), H-2→L+2 (3%), HOMO→L+3 (4%)                                              |
| 8  | 261.38 | 4.74 | 0.047 | H-2→L+1 (18%), HOMO→L+3 (18%)                                               | H-5→LUMO (9%), H-5→L+1 (3%), H-4→LUMO (3%), H-4→L+1 (6%), H-3→LUMO (7%), H-1→L+3 (2%), HOMO→LUMO (3%), HOMO→L+2 (4%), HOMO→L+4 (6%) |
| 9  | 260.26 | 4.76 | 0.034 | H-5→LUMO (15%), H-3→LUMO (16%), H-2→L+1 (14%), H-1→L+1 (12%), H-1→L+2 (11%) | H-4→LUMO (9%), H-3→L+1 (4%), H-2→LUMO (2%)                                                                                          |
| 10 | 258.30 | 4.80 | 0.039 | H-5→L+1 (21%), H-3→L+1 (29%)                                                | H-3→L+4 (3%), H-2→L+1 (7%), H-2→L+3 (2%), H-1→LUMO (3%), H-1→L+1 (9%), HOMO→L+2 (4%)                                                |
| 11 | 257.78 | 4.81 | 0.038 | H-6→L+1 (12%), H-4→L+1 (10%), HOMO→L+2 (12%)                                | H-6→LUMO (3%), H-5→LUMO (3%), H-5→L+1 (4%), H-3→L+1 (3%), H-2→L+2 (5%), H-2→L+3 (5%), H-1→L+3 (3%), HOMO→L+1 (3%), HOMO→L+3 (9%)    |
| 12 | 255.82 | 4.85 | 0.021 | H-4→LUMO (12%), HOMO→L+2 (14%), HOMO→L+4 (10%)                              | H-7→LUMO (6%), H-6→L+1 (7%), H-3→L+1 (5%), H-3→L+2 (3%), H-                                                                         |

|    |        |      |       |                                               |                                                                                                                                                                              |
|----|--------|------|-------|-----------------------------------------------|------------------------------------------------------------------------------------------------------------------------------------------------------------------------------|
|    |        |      |       |                                               | 1→L+2 (4%), H-1→L+3 (2%), HOMO→L+1 (3%), HOMO→L+3 (3%)                                                                                                                       |
| 13 | 255.61 | 4.85 | 0.016 | H-7→LUMO (12%), H-1→L+2 (13%)                 | H-7→L+1 (4%), H-6→LUMO (5%), H-5→LUMO (4%), H-5→L+2 (2%), H-4→L+2 (6%), H-3→L+1 (7%), H-3→L+2 (2%), H-2→L+1 (4%), H-2→L+2 (3%), H-1→L+3 (2%), H-1→L+6 (3%), H-1→L+10 (2%)    |
| 14 | 254.88 | 4.86 | 0.029 | H-3→L+3 (13%), H-1→L+3 (11%), HOMO→L+3 (18%)  | H-6→L+1 (8%), H-4→LUMO (6%), H-3→LUMO (2%), H-3→L+1 (3%), HOMO→L+2 (6%), HOMO→L+4 (3%)                                                                                       |
| 15 | 254.27 | 4.88 | 0.003 | H-2→L+3 (13%)                                 | H-7→LUMO (8%), H-7→L+1 (3%), H-6→LUMO (3%), H-5→LUMO (9%), H-4→LUMO (3%), H-4→L+1 (5%), H-4→L+2 (4%), H-3→L+3 (4%), H-2→L+2 (6%), H-2→L+7 (2%), HOMO→L+2 (9%), HOMO→L+7 (3%) |
| 16 | 253.48 | 4.89 | 0.008 | H-5→LUMO (25%), H-1→L+2 (19%)                 | H-7→L+2 (4%), H-3→LUMO (7%), H-2→L+1 (2%), H-2→L+2 (5%), H-1→L+3 (6%), H-1→L+4 (4%), HOMO→L+6 (2%), HOMO→L+7 (2%)                                                            |
| 17 | 253.23 | 4.90 | 0.019 | H-4→LUMO (12%), H-4→L+1 (16%), HOMO→L+4 (15%) | H-6→L+1 (2%), H-3→L+1 (2%), H-3→L+2 (3%), H-3→L+4 (3%), H-1→L+4 (8%), HOMO→L+2 (2%), HOMO→L+5 (7%), HOMO→L+6 (3%)                                                            |

|    |        |      |       |                                              |                                                                                                                                                               |
|----|--------|------|-------|----------------------------------------------|---------------------------------------------------------------------------------------------------------------------------------------------------------------|
| 18 | 252.77 | 4.90 | 0.017 | H-5→L+1 (29%), H-4→L+1 (12%), H-1→L+3 (11%)  | H-7→LUMO (3%), H-6→LUMO (3%), H-6→L+1 (3%), H-5→LUMO (3%), H-3→L+3 (3%), H-2→L+3 (3%), H-1→L+2 (4%), HOMO→L+5 (4%)                                            |
| 19 | 252.13 | 4.92 | 0.011 | HOMO→L+5 (39%)                               | H-6→L+1 (4%), H-4→LUMO (3%), H-4→L+1 (5%), H-4→L+3 (3%), H-3→L+5 (6%), H-1→L+4 (7%)                                                                           |
| 20 | 250.92 | 4.94 | 0.005 | H-4→LUMO (11%), H-1→L+4 (28%)                | H-7→L+1 (4%), H-5→L+3 (3%), H-3→L+4 (2%), H-1→L+2 (3%), H-1→L+3 (4%), H-1→L+6 (5%), HOMO→L+2 (3%), HOMO→L+4 (4%), HOMO→L+5 (6%), HOMO→L+6 (3%), HOMO→L+7 (3%) |
| 21 | 250.42 | 4.95 | 0.007 | H-5→L+1 (10%), H-1→L+3 (12%), H-1→L+4 (13%)  | H-6→LUMO (3%), H-4→LUMO (2%), H-3→L+3 (3%), H-3→L+4 (2%), H-2→L+3 (9%), HOMO→L+2 (4%), HOMO→L+4 (4%), HOMO→L+6 (6%), HOMO→L+7 (7%)                            |
| 22 | 249.78 | 4.96 | 0.014 | H-2→L+7 (16%), HOMO→L+7 (16%)                | H-5→LUMO (2%), H-4→LUMO (4%), H-4→L+1 (4%), H-3→L+3 (4%), H-2→L+3 (6%), H-1→L+3 (3%), H-1→L+7 (4%), HOMO→L+2 (6%), HOMO→L+4 (3%), HOMO→L+6 (5%)               |
| 23 | 249.52 | 4.97 | 0.013 | H-3→L+2 (10%), H-1→L+3 (19%), HOMO→L+5 (13%) | H-7→L+1 (3%), H-4→L+1 (5%), H-2→L+2 (4%), H-2→L+3 (7%), HOMO→L+2 (4%), HOMO→L+4 (2%),                                                                         |

|    |        |      |       |                                                                        |                                                                                                                                                                                |
|----|--------|------|-------|------------------------------------------------------------------------|--------------------------------------------------------------------------------------------------------------------------------------------------------------------------------|
|    |        |      |       |                                                                        | HOMO→L+7 (8%)                                                                                                                                                                  |
| 24 | 248.56 | 4.99 | 0.013 | H-2→L+2 (19%),<br>HOMO→L+3 (14%),<br>HOMO→L+4 (10%)                    | H-7→LUMO (3%),<br>H-3→L+2 (7%), H-<br>3→L+6 (4%),<br>HOMO→L+2 (2%),<br>HOMO→L+5 (3%),<br>HOMO→L+6 (3%),<br>HOMO→L+7 (7%)                                                       |
| 25 | 248.45 | 4.99 | 0.004 | H-6→L+1 (13%), H-<br>3→L+2 (25%)                                       | H-6→LUMO (6%),<br>H-5→L+1 (3%), H-<br>3→L+3 (9%), H-<br>2→L+2 (2%), H-<br>2→L+3 (9%), H-<br>1→L+3 (3%),<br>HOMO→L+6 (2%),<br>HOMO→L+7 (2%)                                     |
| 26 | 247.95 | 5.00 | 0.002 | H-6→LUMO (17%),<br>HOMO→L+9 (13%)                                      | H-6→L+1 (4%), H-<br>4→L+1 (5%), H-<br>3→L+3 (6%), H-<br>3→L+4 (4%), H-<br>2→L+2 (4%),<br>HOMO→L+6 (7%)                                                                         |
| 27 | 246.94 | 5.02 | 0.010 | H-2→L+3 (12%), H-<br>2→L+4 (21%)                                       | H-5→L+1 (2%), H-<br>3→L+2 (6%), H-<br>2→L+1 (4%), H-<br>2→L+2 (8%), H-<br>1→L+7 (4%),<br>HOMO→L+4 (4%),<br>HOMO→L+6 (3%),<br>HOMO→L+7 (7%),<br>HOMO→L+8 (2%)                   |
| 28 | 246.82 | 5.02 | 0.010 | H-2→L+4 (18%), H-<br>1→L+6 (11%)                                       | H-7→LUMO (7%),<br>H-6→LUMO (3%),<br>H-6→L+1 (8%), H-<br>4→L+2 (3%), H-<br>3→L+4 (8%), H-<br>3→L+6 (3%), H-<br>1→L+4 (3%), H-<br>1→L+7 (3%),<br>HOMO→L+6 (5%),<br>HOMO→L+7 (6%) |
| 29 | 245.98 | 5.04 | 0.011 | H-6→LUMO (13%),<br>H-5→L+2 (10%), H-<br>3→L+2 (10%),<br>HOMO→L+6 (10%) | H-5→L+3 (4%), H-<br>3→L+4 (5%), H-<br>2→L+2 (2%), H-<br>2→L+7 (3%), H-<br>1→L+4 (3%), H-<br>1→L+6 (6%), H-<br>1→L+7 (4%),                                                      |

|    |        |      |       |                                                            |                                                                                                                                                                                                                                                    |
|----|--------|------|-------|------------------------------------------------------------|----------------------------------------------------------------------------------------------------------------------------------------------------------------------------------------------------------------------------------------------------|
|    |        |      |       |                                                            | HOMO→L+7 (3%)                                                                                                                                                                                                                                      |
| 30 | 245.63 | 5.05 | 0.005 |                                                            | H-7→LUMO (4%),<br>H-5→L+1 (3%), H-5→L+2 (2%), H-4→L+2 (5%), H-3→L+2 (2%), H-3→L+4 (5%), H-2→L+2 (4%), H-2→L+3 (3%), H-2→L+7 (7%), H-1→L+2 (3%), H-1→L+6 (7%), H-1→L+7 (3%),<br>HOMO→L+4 (5%),<br>HOMO→L+6 (4%),<br>HOMO→L+7 (7%),<br>HOMO→L+9 (8%) |
| 31 | 245.27 | 5.05 | 0.017 | H-1→L+6 (10%)                                              | H-7→LUMO (8%),<br>H-3→L+6 (6%), H-2→L+2 (6%), H-2→L+6 (2%), H-2→L+7 (5%), H-1→L+5 (4%), H-1→L+8 (9%), H-1→L+10 (7%),<br>HOMO→L+6 (3%),<br>HOMO→L+8 (5%),<br>HOMO→L+9 (5%)                                                                          |
| 32 | 244.75 | 5.07 | 0.012 |                                                            | H-7→LUMO (5%),<br>H-6→LUMO (6%),<br>H-6→L+1 (3%), H-5→L+4 (2%), H-4→L+1 (4%), H-3→L+5 (2%), H-2→L+3 (6%), H-2→L+4 (8%), H-1→L+5 (4%), H-1→L+6 (7%), H-1→L+7 (8%), H-1→L+8 (2%),<br>HOMO→L+6 (6%),<br>HOMO→L+7 (3%),<br>HOMO→L+8 (3%)               |
| 33 | 244.62 | 5.07 | 0.006 | H-7→L+1 (10%), H-3→L+3 (12%), H-2→L+4 (17%), H-1→L+7 (14%) | H-5→L+3 (6%), H-3→L+4 (3%), H-1→L+3 (3%), H-1→L+6 (3%),<br>HOMO→L+8 (2%)                                                                                                                                                                           |

|    |        |      |       |                              |                                                                                                                                                                                                                                      |
|----|--------|------|-------|------------------------------|--------------------------------------------------------------------------------------------------------------------------------------------------------------------------------------------------------------------------------------|
| 34 | 243.93 | 5.08 | 0.015 |                              | H-7→LUMO (8%),<br>H-5→L+3 (2%), H-5→L+4 (9%), H-4→L+2 (7%), H-4→L+3 (4%), H-3→L+3 (4%), H-3→L+4 (5%), H-2→L+6 (5%), H-1→L+4 (5%), H-1→L+5 (3%), H-1→L+8 (2%),<br>HOMO→L+4 (3%),<br>HOMO→L+6 (9%),<br>HOMO→L+8 (4%),<br>HOMO→L+9 (4%) |
| 35 | 243.67 | 5.09 | 0.011 | H-3→L+5 (10%), H-1→L+5 (40%) | H-5→L+2 (2%), H-4→L+5 (8%), H-3→L+2 (2%), H-3→L+6 (3%), H-2→L+5 (4%), H-2→L+6 (3%), H-1→L+8 (2%),<br>HOMO→L+8 (8%),<br>HOMO→L+9 (2%)                                                                                                 |
| 36 | 242.96 | 5.10 | 0.003 | H-7→L+1 (13%)                | H-4→L+2 (6%), H-4→L+3 (5%), H-3→L+3 (9%), H-3→L+4 (2%), H-3→L+7 (2%), H-2→L+6 (2%), H-2→L+7 (9%), H-2→L+8 (3%), H-1→L+5 (3%), H-1→L+7 (5%),<br>HOMO→L+8 (8%),<br>HOMO→L+9 (3%)                                                       |
| 37 | 242.33 | 5.12 | 0.012 | H-5→L+2 (15%)                | H-7→LUMO (6%),<br>H-7→L+3 (2%), H-4→L+2 (5%), H-4→L+3 (6%), H-4→L+4 (5%), H-3→L+4 (8%), H-2→L+4 (3%), H-2→L+6 (3%), H-1→L+6 (9%),<br>HOMO→L+9 (4%)                                                                                   |

|    |        |      |       |                                |                                                                                                                                              |
|----|--------|------|-------|--------------------------------|----------------------------------------------------------------------------------------------------------------------------------------------|
| 38 | 241.97 | 5.12 | 0.026 | H-4→L+3 (11%), H-3→L+5 (11%)   | H-7→L+1 (5%), H-6→LUMO (2%), H-5→L+5 (3%), H-5→L+6 (4%), H-4→L+2 (3%), H-3→L+3 (4%), H-3→L+6 (5%), H-2→L+5 (8%), H-1→L+8 (3%), HOMO→L+9 (4%) |
| 39 | 241.73 | 5.13 | 0.020 | H-1→L+10 (15%), HOMO→L+8 (11%) | H-7→LUMO (3%), H-7→L+2 (7%), H-5→L+3 (7%), H-4→L+6 (6%), H-3→L+7 (2%), H-2→L+8 (3%), H-1→L+6 (5%), H-1→L+7 (4%), HOMO→L+10 (5%)              |
| 40 | 241.35 | 5.14 | 0.014 | H-2→L+5 (11%), H-1→L+5 (11%)   | H-5→L+4 (6%), H-4→L+2 (9%), H-4→L+3 (9%), H-4→L+6 (2%), H-3→L+5 (6%), HOMO→L+5 (2%), HOMO→L+6 (3%), HOMO→L+8 (2%), HOMO→L+9 (7%)             |

**Table S6.** Calculated electronic transitions for **Cr-c** at the B3LYP/6-31G(d,p)/PCM(TFH) level of theory

| Transition n° | Wavelength (nm) | Energy (eV) | Osc. Strength | Major contribs                 | Minor contribs               |
|---------------|-----------------|-------------|---------------|--------------------------------|------------------------------|
| 1             | 297.32          | 4.17        | 0.000         | HOMO→LUMO (95%)                | HOMO→L+3 (2%)                |
| 2             | 288.50          | 4.30        | 0.025         | H-1→LUMO (56%), HOMO→L+1 (40%) | -                            |
| 3             | 287.86          | 4.31        | 0.028         | H-1→LUMO (38%), HOMO→L+1 (56%) | H-3→LUMO (3%)                |
| 4             | 280.95          | 4.41        | 0.012         | H-1→L+1 (84%)                  | H-2→LUMO (7%), HOMO→L+3 (5%) |
| 5             | 279.61          | 4.43        | 0.080         | H-1→L+3 (17%), HOMO→L+2 (75%)  | -                            |
| 6             | 279.58          | 4.43        | 0.003         | H-1→L+2 (31%), HOMO→L+3 (51%)  | H-2→LUMO (6%), H-1→L+1 (3%)  |
| 7             | 275.04          | 4.51        | 0.001         | H-3→L+1 (15%), H-2→LUMO (70%)  | H-1→L+1 (6%), H-1→L+2 (3%)   |
| 8             | 275.00          | 4.51        | 0.003         | H-3→LUMO (77%),                | -                            |



|    |        |      |       |                                                                        |                                                                                      |
|----|--------|------|-------|------------------------------------------------------------------------|--------------------------------------------------------------------------------------|
|    |        |      |       | H-2→L+1 (17%)                                                          |                                                                                      |
| 9  | 267.89 | 4.63 | 0.001 | H-1→L+2 (55%),<br>HOMO→L+3 (34%)                                       | H-1→L+4 (5%)                                                                         |
| 10 | 267.02 | 4.64 | 0.031 | H-2→L+1 (46%), H-<br>1→L+3 (21%)                                       | H-4→LUMO (4%),<br>H-3→LUMO (7%),<br>H-3→L+3 (4%), H-<br>2→L+2 (8%),<br>HOMO→L+2 (3%) |
| 11 | 266.19 | 4.66 | 0.000 | H-3→L+1 (63%), H-<br>3→L+2 (10%), H-<br>2→L+3 (11%)                    | H-2→LUMO (7%),<br>H-1→L+1 (2%)                                                       |
| 12 | 265.92 | 4.66 | 0.020 | H-2→L+1 (17%), H-<br>1→L+3 (53%),<br>HOMO→L+2 (14%)                    | H-3→LUMO (6%),<br>HOMO→L+4 (3%)                                                      |
| 13 | 263.51 | 4.70 | 0.033 | H-3→L+3 (28%), H-<br>2→L+2 (47%)                                       | H-3→LUMO (3%),<br>H-2→L+1 (4%)                                                       |
| 14 | 263.49 | 4.71 | 0.016 | H-3→L+1 (13%), H-<br>3→L+2 (39%), H-<br>2→L+3 (26%)                    | H-2→LUMO (6%),<br>HOMO→L+5 (3%)                                                      |
| 15 | 259.56 | 4.78 | 0.014 | H-6→L+1 (11%), H-<br>5→LUMO (57%)                                      | H-4→L+1 (4%), H-<br>4→L+2 (2%), H-<br>3→L+1 (3%), H-<br>2→L+3 (3%), H-<br>1→L+4 (3%) |
| 16 | 259.25 | 4.78 | 0.034 | H-4→LUMO (24%),<br>HOMO→L+4 (46%)                                      | H-6→LUMO (3%),<br>H-5→L+1 (8%), H-<br>2→L+1 (3%)                                     |
| 17 | 258.24 | 4.80 | 0.050 | H-6→LUMO (26%),<br>H-5→L+1 (17%),<br>HOMO→L+4 (21%)                    | H-4→LUMO (5%),<br>H-2→L+2 (3%), H-<br>1→L+5 (8%)                                     |
| 18 | 258.11 | 4.80 | 0.044 | H-6→LUMO (14%),<br>H-4→LUMO (38%),<br>HOMO→L+4 (18%)                   | H-9→L+1 (4%), H-<br>2→L+1 (8%), H-<br>1→L+5 (6%)                                     |
| 19 | 257.31 | 4.82 | 0.016 | H-2→L+3 (10%),<br>HOMO→L+5 (82%)                                       | -                                                                                    |
| 20 | 256.94 | 4.83 | 0.000 | H-3→L+2 (16%), H-<br>2→L+3 (26%), H-<br>1→L+4 (27%)                    | H-5→LUMO (5%),<br>H-4→L+1 (5%), H-<br>1→L+2 (4%),<br>HOMO→L+5 (6%),<br>HOMO→L+6 (3%) |
| 21 | 255.88 | 4.85 | 0.002 | H-3→L+3 (58%), H-<br>2→L+2 (33%)                                       | HOMO→L+4 (3%)                                                                        |
| 22 | 255.45 | 4.85 | 0.003 | H-3→L+2 (19%), H-<br>2→L+3 (19%), H-<br>1→L+4 (20%),<br>HOMO→L+6 (17%) | H-9→LUMO (2%),<br>H-6→L+1 (2%), H-<br>4→L+1 (3%), H-<br>3→L+4 (3%)                   |
| 23 | 253.99 | 4.88 | 0.000 | H-4→L+1 (33%),<br>HOMO→L+6 (26%)                                       | H-9→LUMO (8%),<br>H-6→L+1 (9%), H-<br>1→L+8 (4%)                                     |

|    |        |      |       |                                                             |                                                                                                                                                                               |
|----|--------|------|-------|-------------------------------------------------------------|-------------------------------------------------------------------------------------------------------------------------------------------------------------------------------|
| 24 | 253.10 | 4.90 | 0.003 | H-1→L+4 (23%),<br>HOMO→L+6 (22%)                            | H-6→L+1 (3%), H-5→LUMO (7%), H-5→L+3 (8%), H-4→L+1 (2%), H-4→L+2 (5%), H-3→L+2 (7%), H-1→L+7 (3%), H-1→L+8 (2%), HOMO→L+9 (4%)                                                |
| 25 | 252.60 | 4.91 | 0.015 | H-5→L+2 (10%), H-4→LUMO (10%), H-1→L+5 (18%), H-1→L+6 (22%) | H-6→LUMO (2%), H-4→L+3 (9%), H-2→L+8 (3%), HOMO→L+7 (8%), HOMO→L+8 (6%)                                                                                                       |
| 26 | 252.12 | 4.92 | 0.084 | H-6→LUMO (10%), H-1→L+5 (54%)                               | H-5→L+1 (5%), H-1→L+6 (8%), HOMO→L+7 (5%), HOMO→L+8 (4%)                                                                                                                      |
| 27 | 250.04 | 4.96 | 0.004 | H-5→L+3 (24%), H-4→L+2 (29%), HOMO→L+6 (10%)                | H-6→L+1 (4%), H-6→L+2 (3%), H-5→LUMO (4%), H-4→L+1 (7%), H-1→L+4 (7%)                                                                                                         |
| 28 | 249.89 | 4.96 | 0.015 | H-5→L+2 (18%), H-4→L+3 (15%), HOMO→L+8 (13%)                | H-6→LUMO (3%), H-6→L+3 (3%), H-4→LUMO (3%), H-3→L+5 (4%), H-3→L+6 (3%), H-2→L+4 (5%), H-2→L+8 (3%), H-1→L+6 (8%), H-1→L+10 (3%)                                               |
| 29 | 248.93 | 4.98 | 0.027 | H-2→L+6 (15%)                                               | H-7→LUMO (9%), H-6→L+1 (4%), H-5→LUMO (3%), H-3→L+4 (6%), H-3→L+8 (8%), H-2→L+5 (4%), H-2→L+10 (3%), H-1→L+7 (3%), H-1→L+8 (7%), HOMO→L+6 (5%), HOMO→L+9 (5%), HOMO→L+10 (4%) |
| 30 | 248.80 | 4.98 | 0.007 | H-5→L+2 (10%), HOMO→L+7 (47%)                               | H-4→L+3 (6%), H-3→L+6 (8%), H-2→L+8 (4%), H-1→L+6 (7%), H-1→L+10 (4%), HOMO→L+8 (2%)                                                                                          |

|    |        |      |       |                                                                        |                                                                                                                           |
|----|--------|------|-------|------------------------------------------------------------------------|---------------------------------------------------------------------------------------------------------------------------|
| 31 | 247.07 | 5.02 | 0.019 | H-7→LUMO (55%),<br>HOMO→L+9 (10%)                                      | H-9→LUMO (3%),<br>H-6→L+1 (7%), H-<br>5→LUMO (2%), H-<br>4→L+1 (5%), H-<br>1→L+8 (2%)                                     |
| 32 | 246.45 | 5.03 | 0.002 | H-6→LUMO (27%),<br>H-5→L+1 (43%)                                       | H-8→LUMO (4%),<br>H-7→L+1 (5%), H-<br>4→LUMO (4%), H-<br>3→L+5 (4%), H-<br>2→L+4 (4%)                                     |
| 33 | 246.05 | 5.04 | 0.007 | HOMO→L+9 (32%),<br>HOMO→L+10<br>(12%)                                  | H-7→LUMO (9%),<br>H-6→L+2 (2%), H-<br>3→L+4 (3%), H-<br>2→L+5 (9%), H-<br>1→L+4 (4%), H-<br>1→L+8 (5%), H-<br>1→L+11 (6%) |
| 34 | 246.01 | 5.04 | 0.003 | H-5→L+1 (13%), H-<br>3→L+5 (12%), H-<br>2→L+4 (11%),<br>HOMO→L+8 (30%) | H-3→L+6 (3%), H-<br>2→L+8 (4%), H-<br>1→L+10 (3%),<br>HOMO→L+7 (4%),<br>HOMO→L+11 (3%)                                    |
| 35 | 245.39 | 5.05 | 0.002 | H-7→LUMO (15%),<br>H-4→L+1 (24%), H-<br>3→L+4 (18%), H-<br>2→L+5 (10%) | H-9→LUMO (4%),<br>H-8→L+1 (2%), H-<br>6→L+1 (2%), H-<br>5→LUMO (7%), H-<br>2→L+6 (3%)                                     |
| 36 | 244.58 | 5.07 | 0.005 | H-3→L+6 (11%), H-<br>2→L+4 (40%)                                       | H-5→L+2 (2%), H-<br>3→L+5 (9%), H-<br>2→L+8 (5%), H-<br>1→L+6 (2%), H-<br>1→L+9 (5%),<br>HOMO→L+8 (7%),<br>HOMO→L+11 (9%) |
| 37 | 244.50 | 5.07 | 0.001 | H-6→L+1 (14%), H-<br>3→L+4 (22%), H-<br>2→L+5 (11%),<br>HOMO→L+9 (21%) | H-7→LUMO (3%),<br>H-6→L+2 (2%), H-<br>5→LUMO (5%), H-<br>4→L+1 (7%), H-<br>1→L+11 (2%)                                    |
| 38 | 243.62 | 5.09 | 0.001 | H-2→L+6 (17%), H-<br>1→L+7 (21%),<br>HOMO→L+10<br>(28%)                | H-4→L+2 (3%), H-<br>3→L+4 (3%), H-<br>3→L+8 (8%), H-<br>1→L+8 (6%)                                                        |
| 39 | 243.59 | 5.09 | 0.022 | H-8→LUMO (10%),<br>H-1→L+9 (15%),<br>HOMO→L+11<br>(28%)                | H-9→L+1 (2%), H-<br>6→L+3 (9%), H-<br>3→L+6 (4%), H-<br>1→L+5 (2%),<br>HOMO→L+7 (3%)                                      |

|    |        |      |       |                |                                                                                                                                                             |
|----|--------|------|-------|----------------|-------------------------------------------------------------------------------------------------------------------------------------------------------------|
| 40 | 243.31 | 5.10 | 0.047 | H-8→LUMO (34%) | H-9→L+1 (8%), H-7→L+1 (2%), H-5→L+1 (6%), H-4→L+3 (2%), H-3→L+5 (2%), H-3→L+6 (5%), H-2→L+4 (7%), H-2→L+8 (3%), H-1→L+9 (3%), HOMO→L+8 (4%), HOMO→L+11 (3%) |
|----|--------|------|-------|----------------|-------------------------------------------------------------------------------------------------------------------------------------------------------------|

**Table S7.** Calculated electronic transitions for **D1-b** at the B3LYP/6-31G(d,p)/PCM(TFH) level of theory

| Transition n° | Wavelength (nm) | Energy (eV) | Osc. Strength | Major contribs                                                | Minor contribs                                                                        |
|---------------|-----------------|-------------|---------------|---------------------------------------------------------------|---------------------------------------------------------------------------------------|
| 1             | 275.62          | 4.50        | 0.020         | H-3→LUMO (11%), H-2→L+1 (11%), H-1→L+1 (22%), HOMO→LUMO (24%) | H-1→LUMO (3%), H-1→L+2 (4%), HOMO→L+1 (3%), HOMO→L+3 (5%)                             |
| 2             | 275.62          | 4.50        | 0.007         | H-3→L+1 (11%), H-2→LUMO (11%), H-1→LUMO (23%), HOMO→L+1 (22%) | H-1→L+1 (3%), H-1→L+3 (5%), HOMO→LUMO (3%), HOMO→L+2 (5%)                             |
| 3             | 273.97          | 4.53        | 0.038         | H-3→LUMO (12%), H-2→L+1 (11%), H-1→L+2 (29%), HOMO→L+3 (29%)  | H-5→LUMO (3%), H-4→L+1 (4%)                                                           |
| 4             | 273.75          | 4.53        | 0.402         | H-3→L+1 (12%), H-2→LUMO (12%), H-1→L+3 (28%), HOMO→L+2 (29%)  | H-5→L+1 (3%), H-4→LUMO (3%)                                                           |
| 5             | 270.97          | 4.58        | 0.020         | H-5→L+1 (28%), H-4→LUMO (31%)                                 | H-3→L+2 (4%), H-2→L+3 (4%), H-1→LUMO (5%), H-1→L+3 (5%), HOMO→L+1 (5%), HOMO→L+2 (5%) |
| 6             | 270.94          | 4.58        | 0.006         | H-5→LUMO (29%), H-4→L+1 (29%)                                 | H-3→L+3 (4%), H-2→L+2 (4%), H-1→L+1 (5%), H-1→L+2 (5%), HOMO→LUMO (6%), HOMO→L+3 (5%) |

|    |        |      |       |                                                             |                                                                                                                                                                                |
|----|--------|------|-------|-------------------------------------------------------------|--------------------------------------------------------------------------------------------------------------------------------------------------------------------------------|
| 7  | 267.89 | 4.63 | 0.057 | H-3→L+1 (11%), H-3→L+2 (11%), H-2→LUMO (13%), H-2→L+3 (11%) | H-5→L+2 (7%), H-4→L+3 (6%), H-1→LUMO (9%), H-1→L+3 (3%), HOMO→L+1 (8%), HOMO→L+2 (4%)                                                                                          |
| 8  | 267.87 | 4.63 | 0.058 | H-3→LUMO (13%), H-3→L+3 (11%), H-2→L+1 (13%), H-2→L+2 (11%) | H-5→L+3 (7%), H-4→L+2 (6%), H-1→L+1 (7%), H-1→L+2 (3%), HOMO→LUMO (9%), HOMO→L+3 (3%), HOMO→L+4 (2%)                                                                           |
| 9  | 265.95 | 4.66 | 0.049 | H-3→L+2 (14%), H-2→L+3 (14%)                                | H-11→LUMO (3%), H-10→L+1 (3%), H-5→L+1 (6%), H-5→L+2 (4%), H-4→LUMO (9%), H-4→L+3 (3%), H-3→L+1 (2%), H-2→LUMO (4%), H-1→LUMO (5%), H-1→L+4 (5%), HOMO→L+1 (6%), HOMO→L+5 (5%) |
| 10 | 265.91 | 4.66 | 0.000 | H-3→L+3 (14%), H-2→L+2 (15%)                                | H-11→L+1 (2%), H-10→LUMO (3%), H-5→LUMO (7%), H-5→L+3 (3%), H-4→L+1 (8%), H-4→L+2 (3%), H-3→LUMO (3%), H-2→L+1 (4%), H-1→L+1 (4%), H-1→L+5 (5%), HOMO→LUMO (7%), HOMO→L+4 (5%) |
| 11 | 263.49 | 4.71 | 0.046 | -                                                           | H-11→LUMO (3%), H-10→L+1 (4%), H-9→L+1 (4%), H-8→LUMO (6%), H-7→L+2 (2%), H-5→L+2 (3%), H-4→L+3 (3%), H-3→L+1 (2%), H-3→L+5 (5%), H-3→L+7 (4%), H-2→LUMO (3%), H-              |

|    |        |      |       |                               |                                                                                                                                                                                                                                                     |
|----|--------|------|-------|-------------------------------|-----------------------------------------------------------------------------------------------------------------------------------------------------------------------------------------------------------------------------------------------------|
|    |        |      |       |                               | 2→L+4 (5%), H-2→L+6 (4%), H-1→L+4 (7%), HOMO→L+5 (7%)                                                                                                                                                                                               |
| 12 | 263.47 | 4.71 | 0.021 | -                             | H-11→L+1 (4%), H-10→LUMO (4%), H-9→LUMO (4%), H-8→L+1 (5%), H-7→L+3 (2%), H-5→L+3 (3%), H-4→L+2 (3%), H-3→LUMO (3%), H-3→L+4 (4%), H-3→L+6 (4%), H-2→L+1 (3%), H-2→L+5 (5%), H-2→L+7 (4%), H-1→L+5 (7%), H-1→L+7 (2%), HOMO→L+4 (8%), HOMO→L+6 (2%) |
| 13 | 262.40 | 4.72 | 0.201 | H-9→L+1 (10%), H-8→LUMO (14%) | H-11→L+3 (3%), H-10→L+2 (3%), H-7→L+1 (4%), H-6→L+3 (2%), H-3→L+5 (4%), H-2→L+4 (5%), H-1→L+4 (2%), H-1→L+6 (7%), HOMO→L+5 (2%), HOMO→L+7 (8%)                                                                                                      |
| 14 | 262.20 | 4.73 | 0.001 | H-9→LUMO (10%), H-8→L+1 (12%) | H-11→L+2 (3%), H-10→L+3 (3%), H-7→LUMO (5%), H-6→L+1 (2%), H-3→L+4 (5%), H-2→L+5 (5%), H-1→L+7 (7%), HOMO→L+4 (3%), HOMO→L+6 (7%)                                                                                                                   |
| 15 | 261.92 | 4.73 | 0.023 | H-9→LUMO (18%), H-8→L+1 (12%) | H-11→L+1 (6%), H-10→LUMO (6%), H-9→L+4 (3%), H-8→L+5 (2%), H-7→LUMO (5%), H-6→L+1 (9%), H-4→L+2 (2%), H-3→LUMO (2%), H-1→L+1 (4%), H-1→L+5 (3%)                                                                                                     |

|    |        |      |       |                                                              |                                                                                                                                                 |
|----|--------|------|-------|--------------------------------------------------------------|-------------------------------------------------------------------------------------------------------------------------------------------------|
| 16 | 261.86 | 4.73 | 0.010 | H-9→L+1 (15%), H-8→LUMO (11%), H-6→LUMO (11%)                | H-11→LUMO (7%), H-10→L+1 (6%), H-9→L+5 (2%), H-8→L+4 (2%), H-7→L+1 (6%), H-5→L+2 (2%), H-4→L+3 (2%), H-1→LUMO (3%), H-1→L+4 (4%), HOMO→L+5 (2%) |
| 17 | 259.99 | 4.77 | 0.009 | H-5→L+3 (13%), H-4→L+2 (17%), H-1→L+1 (17%)                  | H-5→LUMO (5%), H-3→L+3 (9%), H-2→L+1 (5%), H-2→L+2 (6%), HOMO→LUMO (9%), HOMO→L+4 (3%)                                                          |
| 18 | 259.90 | 4.77 | 0.001 | H-5→L+2 (14%), H-4→L+3 (17%), H-1→LUMO (18%), HOMO→L+1 (13%) | H-5→L+1 (5%), H-3→L+2 (8%), H-2→LUMO (6%), H-2→L+3 (5%), HOMO→L+5 (2%)                                                                          |
| 19 | 259.86 | 4.77 | 0.001 | H-1→LUMO (14%), HOMO→L+1 (24%)                               | H-11→LUMO (3%), H-5→L+2 (7%), H-4→LUMO (4%), H-4→L+3 (7%), H-3→L+1 (5%), H-3→L+2 (5%), H-2→LUMO (3%), H-2→L+3 (5%), H-1→L+4 (3%)                |
| 20 | 259.68 | 4.77 | 0.000 | H-1→L+1 (19%), HOMO→LUMO (24%)                               | H-11→L+1 (3%), H-5→L+3 (8%), H-4→L+1 (4%), H-4→L+2 (8%), H-3→LUMO (6%), H-3→L+3 (3%), H-2→L+1 (3%), H-2→L+2 (4%)                                |
| 21 | 258.79 | 4.79 | 0.007 | H-1→L+4 (15%), HOMO→L+5 (17%)                                | H-10→L+1 (2%), H-7→L+2 (4%), H-6→L+3 (4%), H-5→L+5 (7%), H-4→L+4 (7%), H-3→L+5 (5%), H-2→L+4 (6%)                                               |
| 22 | 258.77 | 4.79 | 0.017 | H-1→L+5 (16%), HOMO→L+4 (16%)                                | H-11→L+1 (2%), H-10→LUMO (2%), H-8→L+1 (2%), H-7→L+3 (3%), H-                                                                                   |

|    |        |      |       |                                  |                                                                                                                                                                                                                                |
|----|--------|------|-------|----------------------------------|--------------------------------------------------------------------------------------------------------------------------------------------------------------------------------------------------------------------------------|
|    |        |      |       |                                  | 6→L+2 (3%), H-5→L+4 (8%), H-4→L+5 (7%), H-3→L+4 (5%), H-2→L+5 (6%)                                                                                                                                                             |
| 23 | 258.15 | 4.80 | 0.013 | H-1→L+6 (11%),<br>HOMO→L+7 (13%) | H-7→L+1 (3%), H-6→LUMO (3%), H-5→L+2 (4%), H-5→L+7 (5%), H-4→L+3 (3%), H-4→L+6 (5%), H-3→L+7 (5%), H-2→L+6 (5%), H-2→L+9 (2%), H-1→LUMO (3%), H-1→L+9 (5%),<br>HOMO→L+8 (4%)                                                   |
| 24 | 258.14 | 4.80 | 0.041 | H-1→L+7 (13%),<br>HOMO→L+6 (11%) | H-7→LUMO (3%), H-6→L+1 (3%), H-5→L+6 (5%), H-5→L+9 (2%), H-4→L+2 (3%), H-4→L+7 (6%), H-3→L+6 (4%), H-3→L+9 (2%), H-2→L+7 (5%), H-1→L+8 (4%),<br>HOMO→L+9 (5%)                                                                  |
| 25 | 257.16 | 4.82 | 0.035 | -                                | H-15→LUMO (4%), H-14→L+1 (4%), H-11→L+4 (3%), H-10→L+5 (2%), H-9→L+7 (2%), H-8→L+6 (2%), H-7→L+2 (6%), H-6→L+3 (6%), H-5→L+5 (5%), H-4→L+4 (5%), H-3→L+7 (2%), H-2→L+6 (2%), H-1→L+6 (2%),<br>HOMO→L+7 (2%),<br>HOMO→L+14 (3%) |
| 26 | 257.14 | 4.82 | 0.039 | -                                | H-15→L+1 (4%), H-14→LUMO (4%), H-11→L+5 (2%), H-10→L+4 (3%), H-8→L+7 (2%), H-7→L+3 (5%), H-6→L+2 (6%), H-                                                                                                                      |



|    |        |      |       |                                |                                                                                                                                                                                                          |
|----|--------|------|-------|--------------------------------|----------------------------------------------------------------------------------------------------------------------------------------------------------------------------------------------------------|
|    |        |      |       |                                | 5→L+4 (4%), H-4→L+5 (6%), H-3→L+6 (3%), H-2→L+7 (2%), H-1→L+7 (3%), H-1→L+14 (2%), HOMO→L+4 (2%), HOMO→L+6 (4%), HOMO→L+10 (2%)                                                                          |
| 27 | 256.64 | 4.83 | 0.040 | H-11→L+3 (11%), H-10→L+2 (11%) | H-13→L+1 (3%), H-13→L+2 (8%), H-12→LUMO (3%), H-12→L+3 (8%), H-5→L+5 (2%), H-3→L+5 (4%), H-3→L+7 (2%), H-2→L+4 (5%)                                                                                      |
| 28 | 256.62 | 4.83 | 0.009 | H-11→L+2 (11%), H-10→L+3 (11%) | H-13→LUMO (3%), H-13→L+3 (8%), H-12→L+1 (3%), H-12→L+2 (7%), H-3→L+4 (5%), H-3→L+6 (2%), H-2→L+5 (5%), H-2→L+7 (2%)                                                                                      |
| 29 | 255.46 | 4.85 | 0.025 | -                              | H-11→LUMO (6%), H-10→L+1 (6%), H-9→L+2 (3%), H-8→L+3 (2%), H-7→L+1 (6%), H-6→LUMO (8%), H-6→L+3 (3%), H-4→L+4 (2%), H-3→L+5 (5%), H-2→L+4 (8%), H-1→L+6 (4%), H-1→L+9 (5%), HOMO→L+2 (4%), HOMO→L+8 (5%) |
| 30 | 255.36 | 4.86 | 0.009 | -                              | H-11→L+1 (6%), H-10→LUMO (8%), H-9→L+3 (3%), H-8→L+2 (2%), H-7→LUMO (7%), H-7→L+3 (2%), H-6→L+1 (8%), H-6→L+2 (4%), H-3→L+4 (7%), H-2→L+5 (7%), H-1→L+8 (5%),                                            |

|    |        |      |       |                                   |                                                                                                                                                                                                    |
|----|--------|------|-------|-----------------------------------|----------------------------------------------------------------------------------------------------------------------------------------------------------------------------------------------------|
|    |        |      |       |                                   | HOMO→L+6 (2%),<br>HOMO→L+9 (4%)                                                                                                                                                                    |
| 31 | 254.52 | 4.87 | 0.001 | H-1→L+2 (32%),<br>HOMO→L+3 (25%)  | H-9→L+3 (2%), H-<br>3→LUMO (5%), H-<br>3→L+3 (3%), H-<br>2→L+1 (5%)                                                                                                                                |
| 32 | 254.43 | 4.87 | 0.008 | H-1→L+3 (29%),<br>HOMO→L+2 (21%)  | H-11→LUMO (2%),<br>H-10→L+1 (2%), H-<br>7→L+1 (3%), H-<br>3→L+1 (7%), H-<br>3→L+2 (2%), H-<br>2→LUMO (6%), H-<br>2→L+6 (2%),<br>HOMO→L+1 (3%)                                                      |
| 33 | 254.34 | 4.87 | 0.053 | H-3→L+5 (10%)                     | H-9→L+2 (3%), H-<br>8→L+3 (3%), H-<br>7→L+1 (4%), H-<br>6→LUMO (4%), H-<br>4→L+4 (4%), H-<br>2→L+4 (7%), H-<br>1→L+3 (3%), H-<br>1→L+6 (2%), H-<br>1→L+9 (2%),<br>HOMO→L+2 (6%)                    |
| 34 | 254.29 | 4.88 | 0.002 | -                                 | H-9→L+3 (3%), H-<br>8→L+2 (4%), H-<br>7→LUMO (6%), H-<br>6→L+1 (7%), H-<br>5→L+4 (4%), H-<br>4→L+5 (3%), H-<br>3→LUMO (6%), H-<br>3→L+4 (7%), H-<br>2→L+1 (3%), H-<br>2→L+5 (9%),<br>HOMO→L+3 (3%) |
| 35 | 253.97 | 4.88 | 0.000 | H-3→L+1 (27%), H-<br>2→LUMO (26%) | H-11→LUMO (3%),<br>H-10→L+1 (2%), H-<br>9→L+2 (3%), H-<br>8→L+3 (3%), H-<br>2→L+6 (2%), H-<br>1→LUMO (7%), H-<br>1→L+3 (3%),<br>HOMO→L+1 (6%)                                                      |
| 36 | 253.88 | 4.88 | 0.000 | H-3→LUMO (25%),<br>H-2→L+1 (31%)  | H-7→LUMO (2%),<br>H-3→L+4 (3%), H-<br>1→L+1 (7%), H-<br>1→L+2 (7%),<br>HOMO→LUMO<br>(5%), HOMO→L+3                                                                                                 |

|    |        |      |       |                 |                                                                                                                                                                                                                         |
|----|--------|------|-------|-----------------|-------------------------------------------------------------------------------------------------------------------------------------------------------------------------------------------------------------------------|
|    |        |      |       |                 | (6%)                                                                                                                                                                                                                    |
| 37 | 253.76 | 4.89 | 0.006 | -               | H-15→LUMO (6%), H-14→L+1 (7%), H-10→L+2 (2%), H-8→L+3 (3%), H-7→L+2 (9%), H-6→L+3 (7%), H-5→L+5 (3%), H-4→L+4 (3%), H-2→LUMO (2%), H-1→L+3 (2%), H-1→L+10 (2%), HOMO→L+8 (2%)                                           |
| 38 | 253.75 | 4.89 | 0.002 | -               | H-15→L+1 (4%), H-14→LUMO (4%), H-9→L+3 (4%), H-8→L+2 (8%), H-7→L+3 (8%), H-6→L+2 (5%), H-3→L+6 (4%), H-2→L+7 (3%), H-1→L+8 (3%), HOMO→L+9 (3%)                                                                          |
| 39 | 253.65 | 4.89 | 0.002 | H-10→LUMO (10%) | H-15→L+1 (3%), H-14→LUMO (3%), H-11→L+1 (8%), H-11→L+2 (4%), H-10→L+3 (2%), H-9→L+3 (3%), H-9→L+4 (4%), H-8→L+2 (3%), H-8→L+5 (3%), H-6→L+7 (2%), H-5→L+4 (2%), H-4→L+5 (2%), H-3→L+6 (3%), H-2→L+7 (3%), HOMO→L+3 (7%) |
| 40 | 253.63 | 4.89 | 0.006 | HOMO→L+2 (11%)  | H-11→LUMO (8%), H-11→L+3 (2%), H-10→L+1 (9%), H-9→L+2 (5%), H-9→L+5 (3%), H-8→L+3 (4%), H-8→L+4 (3%), H-3→L+1 (5%), H-3→L+7 (4%), H-2→L+6 (4%), H-                                                                      |

|  |  |  |  |  |            |
|--|--|--|--|--|------------|
|  |  |  |  |  | 1→L+3 (5%) |
|--|--|--|--|--|------------|

**Table S8.** Calculated electronic transitions for **D1-c** at the B3LYP/6-31G(d,p)/PCM(TFH) level of theory

| Transition n° | Wavelength (nm) | Energy (eV) | Osc. Strength | Major contribs                                                                        | Minor contribs                                                                                                   |
|---------------|-----------------|-------------|---------------|---------------------------------------------------------------------------------------|------------------------------------------------------------------------------------------------------------------|
| 1             | 301.32          | 4.11        | 0.000         | H-1→L+1 (40%),<br>HOMO→LUMO (54%)                                                     | -                                                                                                                |
| 2             | 301.24          | 4.12        | 0.003         | H-1→LUMO (51%),<br>HOMO→L+1 (43%)                                                     | -                                                                                                                |
| 3             | 286.96          | 4.32        | 0.014         | H-1→LUMO (17%),<br>H-1→L+3 (11%), H-1→L+4 (18%),<br>HOMO→L+1 (27%),<br>HOMO→L+5 (21%) | -                                                                                                                |
| 4             | 286.95          | 4.32        | 0.020         | H-1→L+1 (29%), H-1→L+5 (18%),<br>HOMO→LUMO (17%), HOMO→L+3 (13%),<br>HOMO→L+4 (16%)   | H-1→L+2 (2%)                                                                                                     |
| 5             | 285.42          | 4.34        | 0.024         | H-1→LUMO (28%),<br>H-1→L+3 (10%), H-1→L+4 (11%),<br>HOMO→L+1 (26%),<br>HOMO→L+5 (19%) | HOMO→L+2 (2%)                                                                                                    |
| 6             | 285.25          | 4.35        | 0.014         | H-1→L+1 (28%), H-1→L+5 (19%),<br>HOMO→LUMO (25%), HOMO→L+3 (11%),<br>HOMO→L+4 (12%)   | -                                                                                                                |
| 7             | 282.65          | 4.39        | 0.060         | H-1→L+3 (16%), H-1→L+4 (11%),<br>HOMO→L+2 (34%)                                       | H-7→LUMO (4%),<br>H-6→L+1 (2%), H-5→LUMO (6%),<br>H-4→L+1 (5%), H-3→L+1 (4%),<br>H-2→LUMO (2%),<br>HOMO→L+5 (5%) |
| 8             | 282.42          | 4.39        | 0.054         | H-1→L+2 (29%),<br>HOMO→L+3 (16%),<br>HOMO→L+4 (15%)                                   | H-7→L+1 (3%), H-6→LUMO (2%),<br>H-5→L+1 (5%), H-4→LUMO (5%),<br>H-3→LUMO (5%), H-1→L+5 (7%)                      |

|    |        |      |       |                                                                          |                                                                                                                                            |
|----|--------|------|-------|--------------------------------------------------------------------------|--------------------------------------------------------------------------------------------------------------------------------------------|
| 9  | 279.72 | 4.43 | 0.009 | H-1→L+7 (33%),<br>HOMO→L+6 (55%)                                         | -                                                                                                                                          |
| 10 | 279.60 | 4.43 | 0.033 | H-1→L+6 (54%),<br>HOMO→L+7 (34%)                                         | -                                                                                                                                          |
| 11 | 278.18 | 4.46 | 0.007 | H-5→L+1 (19%), H-<br>4→LUMO (20%), H-<br>3→LUMO (15%), H-<br>1→L+2 (14%) | H-7→L+1 (4%), H-<br>6→LUMO (3%), H-<br>2→L+1 (5%),<br>HOMO→L+3 (9%),<br>HOMO→L+4 (3%)                                                      |
| 12 | 278.12 | 4.46 | 0.012 | H-5→LUMO (22%),<br>H-4→L+1 (18%), H-<br>3→L+1 (12%),<br>HOMO→L+2 (14%)   | H-7→LUMO (6%),<br>H-6→L+1 (2%), H-<br>2→LUMO (7%), H-<br>1→L+3 (8%), H-<br>1→L+4 (2%)                                                      |
| 13 | 273.94 | 4.53 | 0.005 | H-5→LUMO (18%),<br>H-4→L+1 (16%), H-<br>2→LUMO (18%)                     | H-7→LUMO (6%),<br>H-6→L+1 (8%), H-<br>5→L+1 (2%), H-<br>3→L+1 (8%), H-<br>3→L+5 (4%), H-<br>2→L+4 (2%), H-<br>1→L+3 (2%)                   |
| 14 | 273.92 | 4.53 | 0.003 | H-6→LUMO (10%),<br>H-5→L+1 (16%), H-<br>4→LUMO (15%), H-<br>3→LUMO (10%) | H-7→L+1 (5%), H-<br>4→L+1 (2%), H-<br>3→L+4 (3%), H-<br>2→L+1 (9%), H-<br>2→L+5 (2%), H-<br>1→L+2 (6%), H-<br>1→L+5 (4%),<br>HOMO→L+3 (4%) |
| 15 | 273.66 | 4.53 | 0.000 | H-1→L+3 (40%),<br>HOMO→L+2 (27%),<br>HOMO→L+5 (20%)                      | H-2→LUMO (3%),<br>H-1→L+4 (3%)                                                                                                             |
| 16 | 273.57 | 4.53 | 0.000 | H-1→L+2 (25%), H-<br>1→L+5 (18%),<br>HOMO→L+3 (35%)                      | H-7→L+1 (4%), H-<br>4→LUMO (5%), H-<br>2→L+1 (2%)                                                                                          |
| 17 | 272.47 | 4.55 | 0.002 | H-7→LUMO (27%),<br>H-6→L+1 (27%), H-<br>2→LUMO (23%)                     | H-3→L+1 (5%), H-<br>2→L+4 (2%),<br>HOMO→L+2 (2%)                                                                                           |
| 18 | 272.30 | 4.55 | 0.003 | H-7→L+1 (20%), H-<br>6→LUMO (29%), H-<br>3→LUMO (10%), H-<br>2→L+1 (21%) | H-3→L+4 (2%), H-<br>2→L+5 (3%), H-<br>1→L+2 (2%)                                                                                           |
| 19 | 271.79 | 4.56 | 0.000 | H-1→L+2 (15%), H-<br>1→L+5 (28%),<br>HOMO→L+4 (44%)                      | HOMO→L+3 (5%)                                                                                                                              |

|    |        |      |       |                                                                         |                                                                                                                                                                                                                                                           |
|----|--------|------|-------|-------------------------------------------------------------------------|-----------------------------------------------------------------------------------------------------------------------------------------------------------------------------------------------------------------------------------------------------------|
| 20 | 271.72 | 4.56 | 0.000 | H-1→L+4 (50%),<br>HOMO→L+2 (14%),<br>HOMO→L+5 (25%)                     | H-1→L+3 (7%)                                                                                                                                                                                                                                              |
| 21 | 269.01 | 4.61 | 0.018 | H-5→L+3 (34%), H-<br>4→L+2 (30%)                                        | H-7→LUMO (3%),<br>H-6→L+1 (2%), H-<br>3→L+2 (9%), H-<br>2→L+3 (2%)                                                                                                                                                                                        |
| 22 | 268.96 | 4.61 | 0.007 | H-5→L+2 (35%), H-<br>4→L+3 (31%)                                        | H-7→L+1 (2%), H-<br>6→LUMO (3%), H-<br>3→L+3 (8%), H-<br>2→L+2 (3%)                                                                                                                                                                                       |
| 23 | 267.53 | 4.63 | 0.020 | H-9→LUMO (15%),<br>H-8→L+1 (19%), H-<br>3→L+4 (15%), H-<br>2→L+5 (18%)  | H-13→LUMO (2%),<br>H-3→L+3 (5%), H-<br>2→L+1 (8%)                                                                                                                                                                                                         |
| 24 | 267.44 | 4.64 | 0.091 | H-9→L+1 (16%), H-<br>8→LUMO (21%), H-<br>3→L+5 (18%), H-<br>2→L+4 (16%) | H-8→L+3 (2%), H-<br>2→L+3 (5%)                                                                                                                                                                                                                            |
| 25 | 266.89 | 4.65 | 0.015 | H-7→L+3 (29%), H-<br>6→L+2 (31%)                                        | H-5→L+3 (3%), H-<br>4→L+2 (2%), H-<br>3→L+2 (3%), H-<br>1→L+8 (4%),<br>HOMO→L+9 (4%)                                                                                                                                                                      |
| 26 | 266.86 | 4.65 | 0.015 | H-7→L+2 (26%), H-<br>6→L+3 (33%)                                        | H-9→LUMO (2%),<br>H-5→L+2 (4%), H-<br>3→L+3 (3%), H-<br>1→L+9 (3%),<br>HOMO→L+8 (3%)                                                                                                                                                                      |
| 27 | 265.24 | 4.67 | 0.010 | H-9→LUMO (11%)                                                          | H-13→LUMO (3%),<br>H-12→L+1 (5%), H-<br>9→L+3 (2%), H-<br>8→L+1 (8%), H-<br>7→L+2 (2%), H-<br>7→L+5 (6%), H-<br>6→L+4 (8%), H-<br>5→L+5 (3%), H-<br>4→LUMO (3%), H-<br>4→L+4 (5%), H-<br>3→L+4 (7%), H-<br>2→L+1 (5%), H-<br>2→L+2 (4%), H-<br>1→L+7 (3%) |
| 28 | 265.20 | 4.68 | 0.011 | H-9→L+1 (11%)                                                           | H-13→L+1 (3%), H-<br>12→LUMO (7%), H-<br>8→LUMO (9%), H-<br>8→L+3 (2%), H-<br>7→L+4 (9%), H-                                                                                                                                                              |

|    |        |      |       |                                                |                                                                                                                                                    |
|----|--------|------|-------|------------------------------------------------|----------------------------------------------------------------------------------------------------------------------------------------------------|
|    |        |      |       |                                                | 6→L+5 (5%), H-5→L+4 (4%), H-4→L+5 (5%), H-3→L+2 (5%), H-3→L+5 (5%), H-2→LUMO (3%), H-2→L+4 (3%)                                                    |
| 29 | 264.26 | 4.69 | 0.001 | H-1→L+6 (29%), HOMO→L+7 (48%)                  | H-7→LUMO (2%), H-3→L+1 (4%), H-2→LUMO (3%)                                                                                                         |
| 30 | 264.22 | 4.69 | 0.001 | H-1→L+7 (41%), HOMO→L+6 (25%)                  | H-11→LUMO (4%), H-10→L+1 (4%), H-3→LUMO (2%), H-1→L+9 (3%), HOMO→L+8 (4%)                                                                          |
| 31 | 263.91 | 4.70 | 0.005 | H-11→L+1 (15%), H-10→LUMO (25%)                | H-11→L+2 (7%), H-10→L+3 (7%), H-3→L+1 (5%), H-3→L+5 (2%), H-2→LUMO (5%), H-2→L+6 (4%), H-1→L+8 (6%), HOMO→L+9 (5%)                                 |
| 32 | 263.79 | 4.70 | 0.000 | H-11→LUMO (20%), H-10→L+1 (17%), H-1→L+7 (11%) | H-11→L+3 (6%), H-10→L+2 (6%), H-9→LUMO (3%), H-2→L+1 (4%), H-1→L+9 (3%), HOMO→L+6 (8%), HOMO→L+8 (5%)                                              |
| 33 | 263.39 | 4.71 | 0.006 | H-3→L+1 (26%), H-2→LUMO (12%)                  | H-11→L+1 (7%), H-11→L+2 (2%), H-10→LUMO (6%), H-10→L+3 (2%), H-7→LUMO (7%), H-7→L+4 (3%), H-5→LUMO (6%), H-5→L+4 (2%), H-1→L+6 (5%), HOMO→L+7 (7%) |
| 34 | 263.34 | 4.71 | 0.013 | H-3→LUMO (14%)                                 | H-11→LUMO (2%), H-10→L+1 (3%), H-7→L+1 (7%), H-7→L+2 (3%), H-6→L+4 (4%), H-5→L+1 (6%), H-4→LUMO (3%), H-4→L+4 (4%), H-3→L+6 (7%), H-2→L+5 (5%), H- |

|    |        |      |       |                                                 |                                                                                                                                                                                          |
|----|--------|------|-------|-------------------------------------------------|------------------------------------------------------------------------------------------------------------------------------------------------------------------------------------------|
|    |        |      |       |                                                 | 2→L+7 (6%), H-1→L+9 (6%), HOMO→L+8 (9%)                                                                                                                                                  |
| 35 | 263.16 | 4.71 | 0.012 | H-1→L+8 (27%), HOMO→L+9 (18%)                   | H-11→L+1 (4%), H-10→LUMO (7%), H-6→L+2 (4%), H-6→L+5 (2%), H-3→L+7 (3%), H-2→L+6 (6%), HOMO→L+7 (2%)                                                                                     |
| 36 | 263.14 | 4.71 | 0.000 | H-11→LUMO (10%), H-3→LUMO (18%), HOMO→L+8 (16%) | H-11→L+3 (2%), H-10→L+1 (5%), H-7→L+1 (5%), H-7→L+5 (2%), H-5→L+1 (3%), H-2→L+1 (9%), H-1→L+7 (2%), H-1→L+9 (9%), HOMO→L+6 (2%)                                                          |
| 37 | 262.40 | 4.72 | 0.003 | H-2→L+1 (17%), HOMO→L+8 (10%)                   | H-12→L+1 (3%), H-9→LUMO (3%), H-8→L+1 (3%), H-7→L+1 (3%), H-7→L+5 (5%), H-6→L+4 (6%), H-5→L+1 (2%), H-5→L+5 (4%), H-4→LUMO (5%), H-4→L+4 (8%), H-3→LUMO (8%), H-1→L+9 (7%)               |
| 38 | 262.38 | 4.73 | 0.018 | H-1→L+8 (11%)                                   | H-12→LUMO (2%), H-8→LUMO (2%), H-7→L+4 (5%), H-6→L+5 (7%), H-5→L+4 (4%), H-4→L+5 (9%), H-3→L+1 (9%), H-3→L+2 (7%), H-3→L+7 (4%), H-2→L+3 (4%), H-2→L+4 (6%), H-2→L+6 (7%), HOMO→L+9 (8%) |
| 39 | 262.00 | 4.73 | 0.020 | H-4→LUMO (10%), H-2→L+2 (14%)                   | H-12→L+1 (5%), H-7→L+1 (6%), H-7→L+5 (5%), H-6→LUMO (6%), H-5→L+1 (6%), H-5→L+5 (4%), H-                                                                                                 |



|    |        |      |       |                                             |                                                                                                                                                               |
|----|--------|------|-------|---------------------------------------------|---------------------------------------------------------------------------------------------------------------------------------------------------------------|
|    |        |      |       |                                             | 3→L+3 (5%), H-3→L+6 (7%), H-2→L+7 (6%), H-1→L+9 (3%), HOMO→L+8 (4%)                                                                                           |
| 40 | 261.83 | 4.74 | 0.024 | H-6→L+1 (10%), H-4→L+1 (16%), H-3→L+1 (12%) | H-9→L+1 (2%), H-8→LUMO (4%), H-7→LUMO (6%), H-5→LUMO (7%), H-3→L+5 (6%), H-2→LUMO (3%), H-2→L+3 (5%), H-2→L+4 (4%), H-2→L+6 (3%), H-1→L+8 (3%), HOMO→L+9 (2%) |

**Table S9.** Calculated electronic transitions for **D2-b** at the B3LYP/6-31G(d,p)/PCM(TFH) level of theory

| Transition n° | Wavelength (nm) | Energy (eV) | Osc. Strength | Major contribs                                                               | Minor contribs                                                                       |
|---------------|-----------------|-------------|---------------|------------------------------------------------------------------------------|--------------------------------------------------------------------------------------|
| 1             | 279.17          | 4.44        | 0.013         | H-3→L+1 (15%), H-2→LUMO (20%), H-1→L+1 (17%), HOMO→LUMO (40%)                | -                                                                                    |
| 2             | 278.80          | 4.45        | 0.012         | H-3→LUMO (22%), H-2→L+1 (15%), H-1→LUMO (27%), HOMO→L+1 (28%)                | -                                                                                    |
| 3             | 273.49          | 4.53        | 0.258         | H-5→L+1 (12%), H-4→LUMO (17%), H-1→L+2 (13%), HOMO→L+3 (21%)                 | H-6→LUMO (2%), H-5→L+5 (2%), H-3→L+2 (4%), H-2→LUMO (2%), H-2→L+3 (4%), H-1→L+1 (6%) |
| 4             | 273.21          | 4.54        | 0.003         | H-5→LUMO (18%), H-4→L+1 (14%), H-1→L+3 (16%), HOMO→L+2 (19%)                 | H-7→LUMO (2%), H-4→L+5 (2%), H-3→L+3 (5%), H-2→L+2 (3%), HOMO→L+1 (5%)               |
| 5             | 271.92          | 4.56        | 0.000         | H-5→LUMO (10%), H-4→L+1 (11%), H-2→L+1 (19%), H-1→LUMO (11%), HOMO→L+2 (14%) | H-5→L+3 (2%), H-5→L+4 (2%), H-4→L+5 (2%), H-3→LUMO (5%), H-1→L+3 (8%)                |

|    |        |      |       |                                                                                             |                                                                                                                                   |
|----|--------|------|-------|---------------------------------------------------------------------------------------------|-----------------------------------------------------------------------------------------------------------------------------------|
| 6  | 271.83 | 4.56 | 0.010 | H-5→L+1 (12%), H-4→LUMO (10%), H-3→L+1 (13%), H-2→LUMO (13%), H-1→L+2 (12%), HOMO→L+3 (12%) | H-5→L+5 (2%), H-4→L+3 (2%), H-4→L+4 (2%), HOMO→LUMO (5%)                                                                          |
| 7  | 269.73 | 4.60 | 0.004 | H-3→LUMO (33%), HOMO→L+1 (30%)                                                              | H-6→L+1 (2%), H-2→L+1 (7%), H-1→LUMO (8%), HOMO→L+2 (6%)                                                                          |
| 8  | 269.48 | 4.60 | 0.032 | H-3→L+1 (21%), H-2→LUMO (17%), H-1→L+1 (27%), HOMO→LUMO (14%)                               | H-5→L+1 (3%), H-1→L+2 (5%)                                                                                                        |
| 9  | 268.75 | 4.61 | 0.077 | H-7→L+1 (14%), H-6→LUMO (16%)                                                               | H-7→L+5 (4%), H-6→L+4 (3%), H-3→L+1 (9%), H-2→LUMO (8%), H-2→L+4 (2%), H-1→L+1 (6%), H-1→L+2 (3%), HOMO→LUMO (9%), HOMO→L+3 (4%)  |
| 10 | 268.71 | 4.61 | 0.007 | H-7→LUMO (17%), H-6→L+1 (14%), H-2→L+1 (12%), H-1→LUMO (13%)                                | H-7→L+4 (3%), H-6→L+5 (4%), H-3→LUMO (4%), H-3→L+4 (2%), H-1→L+3 (3%), HOMO→L+1 (3%), HOMO→L+2 (6%)                               |
| 11 | 267.24 | 4.64 | 0.009 | H-3→L+3 (22%), H-2→L+2 (28%)                                                                | H-9→L+3 (2%), H-8→L+2 (3%), H-6→L+1 (3%), H-5→LUMO (5%), H-4→L+1 (3%), H-1→LUMO (5%), H-1→L+8 (4%), HOMO→L+9 (3%)                 |
| 12 | 267.23 | 4.64 | 0.080 | H-3→L+2 (20%), H-2→L+3 (28%)                                                                | H-9→L+2 (2%), H-8→L+3 (2%), H-7→L+1 (3%), H-6→LUMO (2%), H-5→L+1 (2%), H-4→LUMO (4%), H-1→L+9 (3%), HOMO→LUMO (5%), HOMO→L+8 (5%) |

|    |        |      |       |                                              |                                                                                                                                                                                                           |
|----|--------|------|-------|----------------------------------------------|-----------------------------------------------------------------------------------------------------------------------------------------------------------------------------------------------------------|
| 13 | 264.05 | 4.70 | 0.002 | H-1→L+5 (18%),<br>HOMO→L+4 (24%)             | H-5→L+5 (4%), H-4→L+4 (5%), H-3→L+5 (4%), H-3→L+6 (2%), H-2→L+4 (2%), H-2→L+7 (2%), H-2→L+8 (2%), H-1→L+6 (2%), H-1→L+9 (4%), HOMO→L+8 (3%)                                                               |
| 14 | 264.02 | 4.70 | 0.002 | H-1→L+4 (22%),<br>HOMO→L+5 (21%)             | H-5→L+4 (4%), H-4→L+5 (4%), H-3→L+4 (5%), H-3→L+7 (2%), H-2→L+5 (2%), H-2→L+6 (2%), H-2→L+9 (2%), H-1→L+8 (3%), HOMO→L+6 (3%), HOMO→L+9 (3%)                                                              |
| 15 | 263.72 | 4.70 | 0.093 | H-1→L+2 (10%)                                | H-7→L+1 (7%), H-7→L+5 (3%), H-6→LUMO (9%), H-6→L+4 (2%), H-5→L+1 (4%), H-4→LUMO (9%), H-3→L+1 (2%), H-2→LUMO (4%), H-2→L+3 (6%), H-1→L+1 (5%), H-1→L+9 (3%), HOMO→LUMO (3%), HOMO→L+4 (3%), HOMO→L+8 (7%) |
| 16 | 263.61 | 4.70 | 0.035 | H-7→LUMO (10%)                               | H-6→L+1 (8%), H-6→L+5 (2%), H-5→LUMO (7%), H-4→L+1 (3%), H-3→LUMO (3%), H-3→L+3 (9%), H-2→L+1 (3%), H-1→LUMO (3%), H-1→L+8 (8%), HOMO→L+1 (5%), HOMO→L+2 (9%), HOMO→L+9 (4%)                              |
| 17 | 263.35 | 4.71 | 0.000 | H-3→L+3 (11%), H-2→L+2 (18%), H-1→L+3 (27%), | H-2→L+1 (3%),<br>HOMO→L+9 (2%)                                                                                                                                                                            |

|    |        |      |       |                                              |                                                                                                                                                                                                                                     |
|----|--------|------|-------|----------------------------------------------|-------------------------------------------------------------------------------------------------------------------------------------------------------------------------------------------------------------------------------------|
|    |        |      |       | HOMO→L+2 (15%)                               |                                                                                                                                                                                                                                     |
| 18 | 263.12 | 4.71 | 0.017 | H-3→L+2 (30%), H-1→L+2 (16%), HOMO→L+3 (25%) | H-3→L+1 (3%), H-2→L+3 (4%), H-2→L+8 (3%), H-1→L+9 (3%)                                                                                                                                                                              |
| 19 | 262.30 | 4.73 | 0.000 | H-2→L+6 (15%), HOMO→L+6 (18%)                | H-5→LUMO (4%), H-4→L+2 (3%), H-3→L+4 (3%), H-3→L+7 (8%), H-1→LUMO (3%), H-1→L+3 (6%), H-1→L+7 (9%), H-1→L+8 (2%), HOMO→L+5 (2%), HOMO→L+9 (2%)                                                                                      |
| 20 | 262.22 | 4.73 | 0.037 | H-3→L+6 (13%), HOMO→L+7 (13%)                | H-5→L+2 (4%), H-4→LUMO (5%), H-4→L+3 (3%), H-2→LUMO (2%), H-2→L+4 (5%), H-2→L+7 (6%), H-2→L+8 (2%), H-1→L+6 (9%), H-1→L+9 (4%), HOMO→LUMO (3%), HOMO→L+3 (4%), HOMO→L+8 (3%)                                                        |
| 21 | 261.71 | 4.74 | 0.019 | -                                            | H-7→LUMO (2%), H-5→L+3 (3%), H-5→L+4 (3%), H-4→L+2 (2%), H-4→L+5 (5%), H-3→L+3 (8%), H-3→L+4 (4%), H-3→L+7 (2%), H-2→L+1 (5%), H-2→L+5 (4%), H-2→L+6 (4%), H-1→L+8 (8%), HOMO→L+1 (3%), HOMO→L+2 (3%), HOMO→L+6 (7%), HOMO→L+9 (8%) |
| 22 | 261.66 | 4.74 | 0.051 | -                                            | H-6→LUMO (3%), H-5→L+5 (3%), H-4→L+4 (3%), H-3→L+1 (3%), H-                                                                                                                                                                         |

|    |        |      |       |                                             |                                                                                                                                                          |
|----|--------|------|-------|---------------------------------------------|----------------------------------------------------------------------------------------------------------------------------------------------------------|
|    |        |      |       |                                             | 3→L+5 (5%), H-3→L+6 (7%), H-2→L+3 (8%), H-2→L+4 (3%), H-2→L+7 (4%), H-1→L+1 (5%), H-1→L+2 (3%), H-1→L+6 (8%), H-1→L+9 (6%), HOMO→L+7 (4%), HOMO→L+8 (7%) |
| 23 | 260.97 | 4.75 | 0.055 | H-5→L+5 (17%), H-4→L+4 (15%)                | H-11→L+1 (3%), H-10→LUMO (3%), H-7→L+5 (5%), H-6→L+4 (4%), H-3→L+5 (5%), H-2→L+4 (8%), H-1→L+5 (2%), HOMO→L+4 (5%), HOMO→L+12 (3%)                       |
| 24 | 260.84 | 4.75 | 0.026 | H-5→L+4 (13%), H-4→L+5 (11%), H-2→L+5 (10%) | H-11→LUMO (2%), H-10→L+1 (3%), H-7→L+4 (5%), H-6→L+5 (5%), H-4→L+1 (3%), H-4→L+2 (3%), H-3→L+4 (8%), H-1→L+4 (3%), HOMO→L+5 (6%)                         |
| 25 | 260.77 | 4.75 | 0.001 | H-5→L+2 (15%), H-4→L+3 (16%)                | H-9→L+2 (3%), H-7→L+1 (4%), H-5→L+1 (6%), H-5→L+5 (2%), H-4→LUMO (5%), H-4→L+4 (3%), H-3→L+5 (3%), H-2→LUMO (4%), H-1→L+9 (2%), HOMO→LUMO (4%)           |
| 26 | 260.74 | 4.75 | 0.001 | H-5→L+3 (15%), H-4→L+2 (14%)                | H-8→L+2 (3%), H-6→L+1 (4%), H-5→LUMO (6%), H-5→L+4 (6%), H-4→L+1 (4%), H-4→L+5 (6%), H-3→LUMO (2%), H-1→LUMO (5%)                                        |

|    |        |      |       |                                                                         |                                                                                                                                                                                                                                                                              |
|----|--------|------|-------|-------------------------------------------------------------------------|------------------------------------------------------------------------------------------------------------------------------------------------------------------------------------------------------------------------------------------------------------------------------|
| 27 | 259.66 | 4.77 | 0.001 | H-3→LUMO (10%),<br>H-2→L+1 (19%), H-<br>1→LUMO (11%),<br>HOMO→L+1 (14%) | H-5→L+3 (7%), H-<br>4→L+1 (4%), H-<br>4→L+2 (7%), H-<br>2→L+2 (4%),<br>HOMO→L+2 (2%)                                                                                                                                                                                         |
| 28 | 259.65 | 4.78 | 0.004 | H-3→L+1 (14%), H-<br>2→LUMO (12%), H-<br>1→L+1 (18%)                    | H-5→L+1 (5%), H-<br>5→L+2 (7%), H-<br>4→L+3 (6%), H-<br>3→L+2 (3%), H-<br>1→L+2 (3%),<br>HOMO→LUMO<br>(9%)                                                                                                                                                                   |
| 29 | 258.13 | 4.80 | 0.005 | -                                                                       | H-7→L+4 (2%), H-<br>3→L+4 (4%), H-<br>3→L+7 (6%), H-<br>3→L+8 (2%), H-<br>3→L+10 (3%), H-<br>2→L+5 (7%), H-<br>2→L+9 (2%), H-<br>2→L+13 (2%), H-<br>1→L+4 (2%), H-<br>1→L+7 (7%), H-<br>1→L+10 (7%),<br>HOMO→L+9 (3%),<br>HOMO→L+11 (8%)                                     |
| 30 | 258.12 | 4.80 | 0.046 | HOMO→L+7 (11%),<br>HOMO→L+10<br>(10%)                                   | H-13→L+2 (2%), H-<br>3→L+5 (6%), H-<br>3→L+9 (3%), H-<br>3→L+13 (2%), H-<br>2→L+4 (4%), H-<br>2→L+7 (5%), H-<br>2→L+8 (3%), H-<br>2→L+12 (2%), H-<br>1→L+9 (2%), H-<br>1→L+11 (7%)                                                                                           |
| 31 | 257.84 | 4.81 | 0.028 | -                                                                       | H-7→L+5 (3%), H-<br>6→L+4 (3%), H-<br>5→L+9 (3%), H-<br>4→LUMO (6%), H-<br>4→L+8 (4%), H-<br>3→L+1 (2%), H-<br>3→L+5 (4%), H-<br>2→L+4 (6%), H-<br>1→L+1 (2%), H-<br>1→L+5 (3%), H-<br>1→L+6 (2%), H-<br>1→L+11 (5%), H-<br>1→L+13 (4%),<br>HOMO→L+4 (2%),<br>HOMO→L+7 (2%), |

|    |        |      |       |                                   |                                                                                                                                                                                                            |
|----|--------|------|-------|-----------------------------------|------------------------------------------------------------------------------------------------------------------------------------------------------------------------------------------------------------|
|    |        |      |       |                                   | HOMO→L+10 (8%),<br>HOMO→L+12 (4%)                                                                                                                                                                          |
| 32 | 257.78 | 4.81 | 0.027 | -                                 | H-7→L+4 (2%), H-6→L+5 (2%), H-5→LUMO (6%), H-5→L+8 (3%), H-4→L+9 (3%), H-3→L+4 (4%), H-2→L+1 (2%), H-2→L+5 (5%), H-1→L+7 (3%), H-1→L+10 (8%), H-1→L+12 (3%), HOMO→L+6 (2%), HOMO→L+11 (8%), HOMO→L+13 (3%) |
| 33 | 257.22 | 4.82 | 0.000 | H-5→L+1 (10%)                     | H-7→L+2 (4%), H-6→L+3 (2%), H-5→L+9 (4%), H-4→LUMO (8%), H-4→L+7 (3%), H-4→L+8 (3%), H-3→L+9 (2%), H-2→LUMO (5%), H-2→L+8 (3%), H-1→L+5 (5%), HOMO→L+4 (4%), HOMO→L+7 (3%), HOMO→L+12 (3%)                 |
| 34 | 257.12 | 4.82 | 0.006 | H-4→L+1 (13%)                     | H-7→L+3 (3%), H-6→L+2 (4%), H-5→LUMO (9%), H-5→L+7 (4%), H-5→L+8 (4%), H-4→L+9 (4%), H-3→LUMO (6%), H-3→L+4 (2%), H-3→L+8 (2%), H-2→L+9 (3%), H-1→LUMO (2%), H-1→L+4 (3%), HOMO→L+5 (4%)                   |
| 35 | 256.46 | 4.83 | 0.002 | H-5→L+1 (10%),<br>HOMO→L+10 (10%) | H-7→L+2 (3%), H-6→L+3 (3%), H-5→L+5 (3%), H-4→LUMO (4%), H-3→L+1 (2%), H-2→L+12 (3%), H-1→L+5 (2%), H-                                                                                                     |

|    |        |      |       |                |                                                                                                                                                                           |
|----|--------|------|-------|----------------|---------------------------------------------------------------------------------------------------------------------------------------------------------------------------|
|    |        |      |       |                | 1→L+11 (9%),<br>HOMO→L+8 (2%),<br>HOMO→L+12 (4%)                                                                                                                          |
| 36 | 256.33 | 4.84 | 0.005 | H-4→L+1 (11%)  | H-7→L+3 (2%), H-5→LUMO (4%), H-4→L+5 (3%), H-3→L+8 (3%), H-3→L+12 (3%), H-1→L+4 (3%), H-1→L+10 (8%), HOMO→L+5 (5%), HOMO→L+11 (8%)                                        |
| 37 | 256.23 | 4.84 | 0.002 | H-4→LUMO (10%) | H-7→L+2 (4%), H-6→L+3 (6%), H-6→L+7 (2%), H-5→L+1 (7%), H-5→L+2 (4%), H-5→L+6 (6%), H-4→L+3 (3%), H-4→L+4 (4%), H-4→L+7 (5%), H-3→L+2 (3%)                                |
| 38 | 256.22 | 4.84 | 0.001 | H-5→LUMO (11%) | H-7→L+3 (6%), H-6→L+2 (4%), H-5→L+3 (3%), H-5→L+4 (3%), H-5→L+7 (5%), H-4→L+1 (9%), H-4→L+2 (5%), H-4→L+6 (5%), H-2→L+2 (3%)                                              |
| 39 | 256.10 | 4.84 | 0.002 | -              | H-9→L+1 (5%), H-8→LUMO (3%), H-7→L+5 (5%), H-6→L+4 (4%), H-5→L+1 (9%), H-5→L+9 (5%), H-4→LUMO (5%), H-4→L+8 (5%), H-3→L+5 (7%), H-2→L+4 (7%), H-1→L+9 (3%), HOMO→L+8 (4%) |
| 40 | 256.03 | 4.84 | 0.045 | -              | H-11→LUMO (2%), H-9→LUMO (3%), H-8→L+1 (4%), H-7→L+4 (4%), H-6→L+5 (4%), H-5→L+8 (4%), H-                                                                                 |



|  |  |  |  |  |                                                                                                                |
|--|--|--|--|--|----------------------------------------------------------------------------------------------------------------|
|  |  |  |  |  | 4→L+1 (4%), H-4→L+9 (4%), H-3→L+4 (5%), H-3→L+7 (3%), H-2→L+5 (9%), H-1→L+8 (6%), H-1→L+12 (3%), HOMO→L+9 (4%) |
|--|--|--|--|--|----------------------------------------------------------------------------------------------------------------|

**Table S10.** Calculated electronic transitions for **D2-c** at the B3LYP/6-31G(d,p)/PCM(TFH) level of theory

| Transition n° | Wavelength (nm) | Energy (eV) | Osc. Strength | Major contribs                                                | Minor contribs                              |
|---------------|-----------------|-------------|---------------|---------------------------------------------------------------|---------------------------------------------|
| 1             | 298.45          | 4.15        | 0.002         | HOMO→L+2 (92%)                                                | HOMO→L+8 (3%)                               |
| 2             | 298.24          | 4.16        | 0.001         | H-1→LUMO (91%)                                                | -                                           |
| 3             | 288.65          | 4.30        | 0.030         | H-3→LUMO (26%), H-1→L+1 (69%)                                 | -                                           |
| 4             | 287.97          | 4.31        | 0.024         | H-3→LUMO (68%), H-1→L+1 (23%)                                 | -                                           |
| 5             | 287.71          | 4.31        | 0.017         | H-2→L+2 (93%)                                                 | -                                           |
| 6             | 286.16          | 4.33        | 0.022         | HOMO→LUMO (38%), HOMO→L+5 (42%)                               | HOMO→L+3 (5%), HOMO→L+7 (3%), HOMO→L+8 (5%) |
| 7             | 284.74          | 4.35        | 0.015         | HOMO→LUMO (55%), HOMO→L+5 (31%)                               | HOMO→L+6 (3%), HOMO→L+7 (2%), HOMO→L+8 (5%) |
| 8             | 282.54          | 4.39        | 0.049         | H-3→L+3 (31%), H-1→L+3 (58%)                                  | -                                           |
| 9             | 281.29          | 4.41        | 0.049         | H-2→L+7 (14%), HOMO→L+5 (13%), HOMO→L+7 (40%), HOMO→L+8 (17%) | H-2→L+5 (5%), H-2→L+8 (4%)                  |
| 10            | 281.24          | 4.41        | 0.051         | HOMO→L+7 (33%), HOMO→L+8 (43%)                                | H-2→L+7 (6%), H-2→L+8 (9%)                  |
| 11            | 280.14          | 4.43        | 0.030         | H-3→L+1 (32%), H-1→L+4 (48%)                                  | H-3→L+3 (4%), H-3→L+4 (6%), H-1→L+3 (3%)    |
| 12            | 279.82          | 4.43        | 0.018         | H-3→L+1 (61%), H-1→L+4 (22%)                                  | H-6→LUMO (3%), H-3→L+4 (4%), H-1→L+3 (3%)   |
| 13            | 276.47          | 4.48        | 0.001         | H-2→LUMO (15%), HOMO→L+1 (39%), HOMO→L+3 (34%)                | H-2→L+5 (4%)                                |
| 14            | 275.81          | 4.50        | 0.006         | H-2→LUMO (12%), H-2→L+5 (19%),                                | H-2→L+7 (3%), HOMO→LUMO                     |

|    |        |      |       |                                                                   |                                                                                                    |
|----|--------|------|-------|-------------------------------------------------------------------|----------------------------------------------------------------------------------------------------|
|    |        |      |       | HOMO→L+3 (48%)                                                    | (3%), HOMO→L+1 (7%)                                                                                |
| 15 | 275.43 | 4.50 | 0.009 | H-2→L+5 (33%),<br>HOMO→L+1 (37%)                                  | H-5→L+2 (2%), H-4→L+2 (3%), H-2→L+7 (4%),<br>HOMO→L+3 (9%)                                         |
| 16 | 274.18 | 4.52 | 0.003 | H-2→LUMO (65%),<br>H-2→L+5 (10%),<br>HOMO→L+1 (11%)               | H-5→L+2 (5%), H-4→L+2 (3%)                                                                         |
| 17 | 274.00 | 4.52 | 0.001 | H-6→LUMO (68%),<br>H-6→L+1 (21%)                                  | H-3→L+3 (2%)                                                                                       |
| 18 | 273.16 | 4.54 | 0.004 | H-5→L+2 (66%), H-4→L+2 (11%)                                      | H-2→LUMO (2%),<br>H-2→L+5 (9%), H-2→L+7 (2%)                                                       |
| 19 | 271.45 | 4.57 | 0.002 | H-3→L+3 (25%), H-3→L+6 (14%),<br>H-1→L+3 (16%), H-1→L+6 (29%)     | H-1→L+4 (4%)                                                                                       |
| 20 | 270.79 | 4.58 | 0.006 | H-3→L+3 (26%), H-3→L+6 (15%),<br>H-1→L+3 (11%), H-1→L+6 (34%)     | H-1→L+4 (7%)                                                                                       |
| 21 | 269.88 | 4.59 | 0.002 | H-5→L+2 (12%), H-4→L+2 (46%),<br>H-2→L+7 (12%)                    | H-4→L+5 (7%), H-4→L+7 (4%),<br>H-2→L+8 (3%),<br>HOMO→L+8 (2%)                                      |
| 22 | 269.23 | 4.61 | 0.003 | H-4→L+2 (12%), H-2→L+5 (11%),<br>H-2→L+7 (37%),<br>HOMO→L+8 (14%) | H-5→L+2 (2%), H-4→L+5 (3%),<br>H-2→L+8 (3%),<br>HOMO→L+5 (3%),<br>HOMO→L+7 (6%)                    |
| 23 | 267.96 | 4.63 | 0.000 | HOMO→L+6 (85%)                                                    | HOMO→L+1 (2%),<br>HOMO→L+4 (3%)                                                                    |
| 24 | 267.28 | 4.64 | 0.026 | H-10→LUMO (23%),<br>H-6→LUMO (13%),<br>H-6→L+1 (50%)              | -                                                                                                  |
| 25 | 266.44 | 4.65 | 0.000 | H-2→L+1 (47%),<br>H-2→L+3 (42%)                                   | HOMO→L+6 (2%)                                                                                      |
| 26 | 266.21 | 4.66 | 0.008 | H-2→L+8 (56%)                                                     | H-2→L+1 (4%), H-2→L+3 (9%),<br>H-2→L+7 (7%),<br>HOMO→L+7 (6%),<br>HOMO→L+8 (5%),<br>HOMO→L+11 (2%) |
| 27 | 265.97 | 4.66 | 0.001 | H-2→L+1 (43%),<br>H-2→L+3 (38%),<br>H-2→L+8 (11%)                 | H-2→LUMO (2%)                                                                                      |

|    |        |      |       |                                                              |                                                                                      |
|----|--------|------|-------|--------------------------------------------------------------|--------------------------------------------------------------------------------------|
| 28 | 265.00 | 4.68 | 0.038 | H-7→L+2 (27%), H-4→L+5 (34%)                                 | H-8→L+2 (8%), H-4→LUMO (3%), H-4→L+2 (3%), H-4→L+7 (2%)                              |
| 29 | 264.86 | 4.68 | 0.015 | H-3→L+4 (60%), HOMO→L+4 (15%)                                | H-3→L+9 (4%), H-1→L+4 (8%), H-1→L+9 (4%)                                             |
| 30 | 264.80 | 4.68 | 0.004 | H-3→L+4 (11%), HOMO→L+4 (79%)                                | HOMO→L+6 (3%)                                                                        |
| 31 | 263.65 | 4.70 | 0.008 | H-10→LUMO (49%), H-6→L+1 (16%)                               | H-11→LUMO (2%), H-10→L+1 (6%), H-10→L+4 (2%), H-6→LUMO (6%), H-3→L+6 (3%)            |
| 32 | 263.31 | 4.71 | 0.001 | H-1→L+2 (90%)                                                | H-3→L+2 (3%)                                                                         |
| 33 | 263.22 | 4.71 | 0.002 | H-4→LUMO (85%)                                               | H-7→L+2 (2%), H-5→LUMO (4%)                                                          |
| 34 | 262.98 | 4.71 | 0.028 | H-6→L+3 (22%), H-6→L+4 (54%)                                 | H-10→LUMO (3%), H-3→L+9 (3%)                                                         |
| 35 | 262.71 | 4.72 | 0.016 | H-5→L+5 (27%), H-5→L+7 (30%)                                 | H-8→L+5 (2%), H-5→L+8 (9%), H-4→L+5 (5%), H-4→L+7 (5%), H-4→L+8 (4%), HOMO→L+11 (6%) |
| 36 | 262.11 | 4.73 | 0.033 | H-4→L+7 (27%), H-4→L+8 (27%)                                 | H-9→L+2 (7%), H-5→L+8 (6%), H-4→L+2 (6%), HOMO→L+11 (5%)                             |
| 37 | 261.87 | 4.73 | 0.019 | H-11→LUMO (13%), H-3→L+6 (31%), H-1→L+6 (17%), H-1→L+9 (15%) | H-6→L+4 (5%)                                                                         |
| 38 | 261.55 | 4.74 | 0.023 | H-9→L+2 (25%), H-7→L+2 (18%), H-4→L+5 (15%), H-4→L+8 (11%)   | H-2→L+11 (3%)                                                                        |
| 39 | 261.14 | 4.75 | 0.031 | H-11→LUMO (42%), H-3→L+6 (16%)                               | H-11→L+1 (3%), H-11→L+3 (4%), H-10→LUMO (3%), H-6→L+3 (2%), H-1→L+6 (6%)             |

|    |        |      |       |                    |                                                                                                                   |
|----|--------|------|-------|--------------------|-------------------------------------------------------------------------------------------------------------------|
| 40 | 260.94 | 4.75 | 0.023 | HOMO→L+11<br>(43%) | H-8→L+2 (6%), H-8→L+5 (4%), H-7→L+5 (2%), H-5→LUMO (2%), H-5→L+5 (6%), H-4→L+5 (2%), H-4→L+8 (9%), HOMO→L+12 (7%) |
|----|--------|------|-------|--------------------|-------------------------------------------------------------------------------------------------------------------|

**Table S11.** NTO analysis of electronic transition 2 of **C1-b** at the B3LYP/6-31G(d,p)/PCM(TFH) level of theory

| Compound (State)   | Transition energy ( $\lambda$ ) [eV (nm)] | NTO couple (Contribution)                                                                               |
|--------------------|-------------------------------------------|---------------------------------------------------------------------------------------------------------|
| <b>C1-b</b><br>(2) | 4.54 (273.26)                             | H → L<br>(69.0%)<br>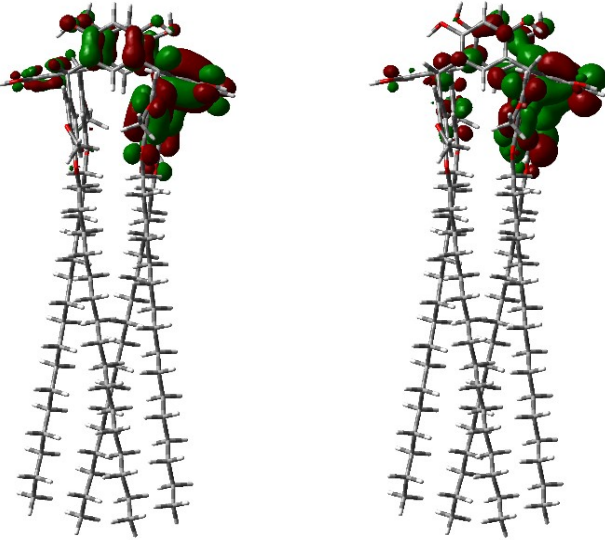 |

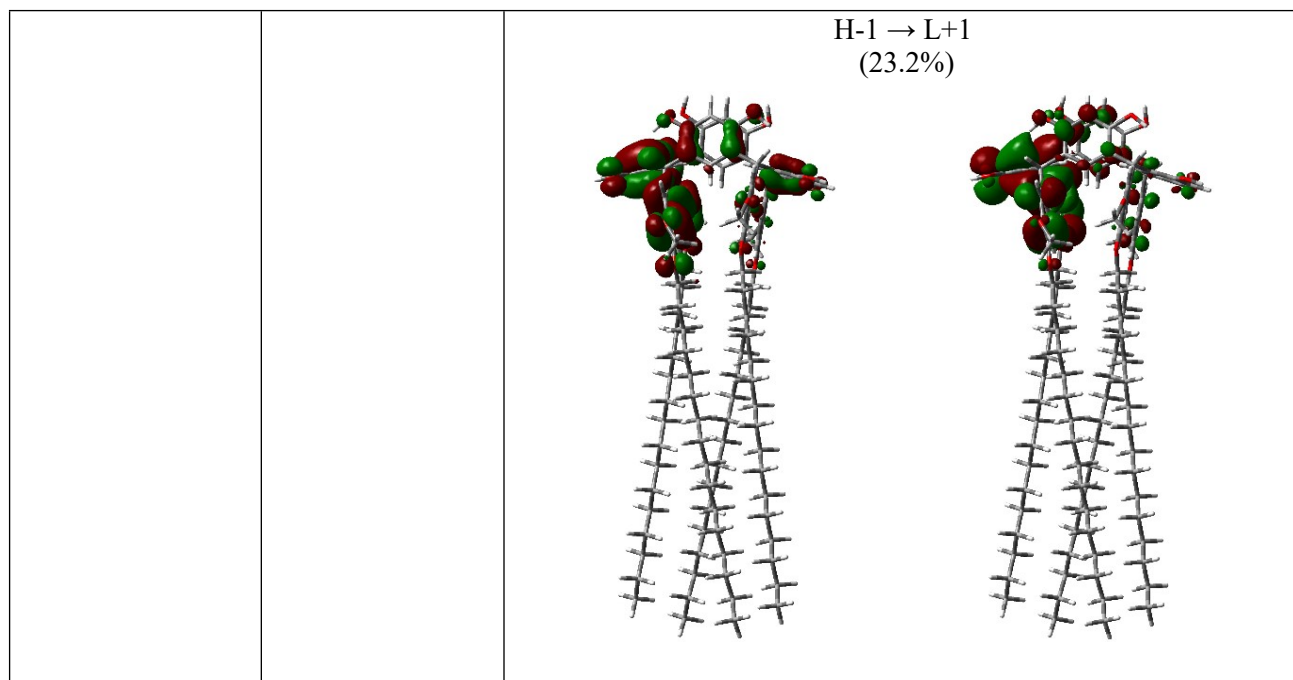

**Table S12.** NTO analysis of electronic transitions 5, 17 and 20 of **C1-c** at the B3LYP/6-31G(d,p)/PCM(TFH) level of theory

| Compound<br>(State) | Transition energy<br>( $\lambda$ ) [eV (nm)] | NTO couple<br>(Contribution)                                                                                                         |
|---------------------|----------------------------------------------|--------------------------------------------------------------------------------------------------------------------------------------|
| <b>C1-c</b><br>(5)  | 4.42 (278.53)                                | <p>H <math>\rightarrow</math> L<br/>(75.3%)</p> 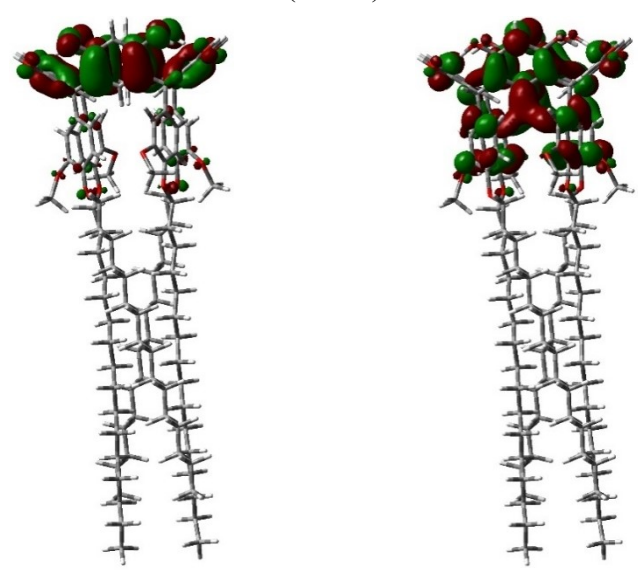 |

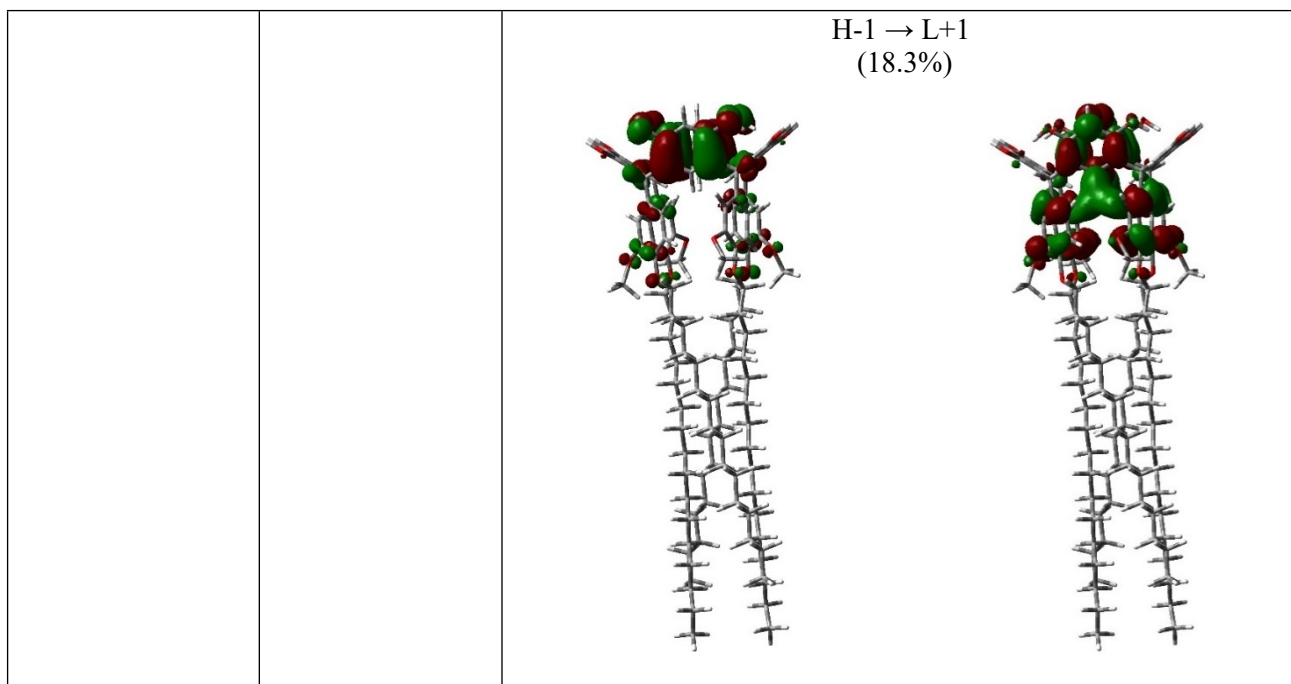

| Compound (State)    | Transition energy ( $\lambda$ ) [eV (nm)] | NTO couple (Contribution)                                                                                     |
|---------------------|-------------------------------------------|---------------------------------------------------------------------------------------------------------------|
| <b>C1-c</b><br>(17) | 4.80 (258.20)                             | <p>H → L<br/>(86.5%)</p> 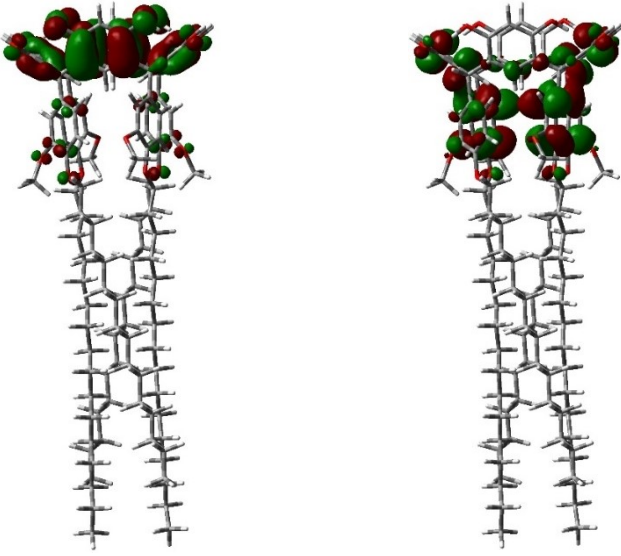 |

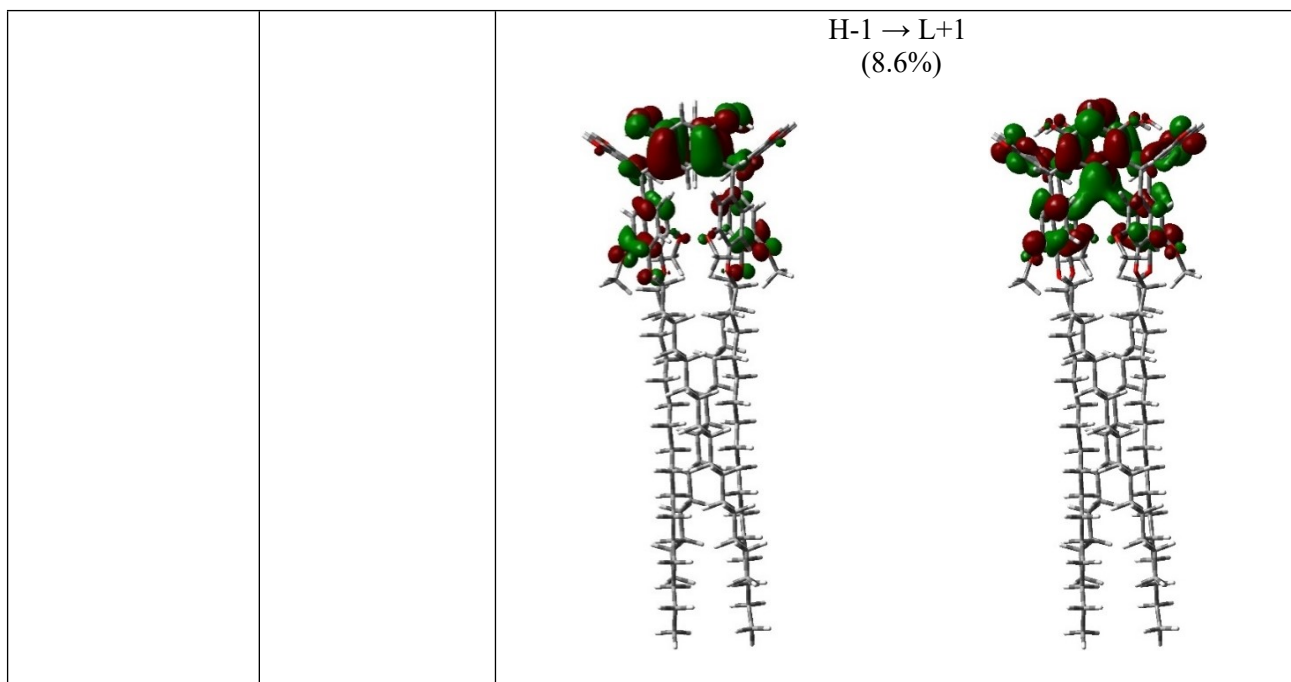

| Compound<br>(State) | Transition<br>energy ( $\lambda$ ) [eV<br>(nm)] | NTO couple<br>(Contribution) |
|---------------------|-------------------------------------------------|------------------------------|
|---------------------|-------------------------------------------------|------------------------------|

|                             |                      |                                                                                                                  |
|-----------------------------|----------------------|------------------------------------------------------------------------------------------------------------------|
| <p><b>C1-c</b><br/>(20)</p> | <p>4.83 (256.94)</p> | <p>H → L<br/>(38.5%)</p> 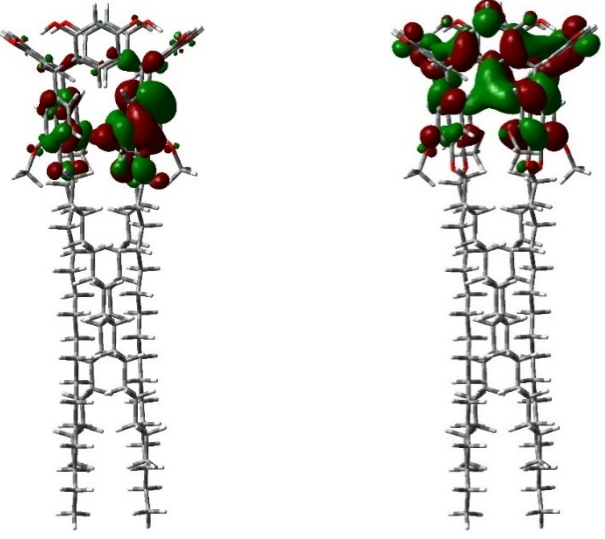      |
|                             |                      | <p>H-1 → L+1<br/>(38.0%)</p>  |



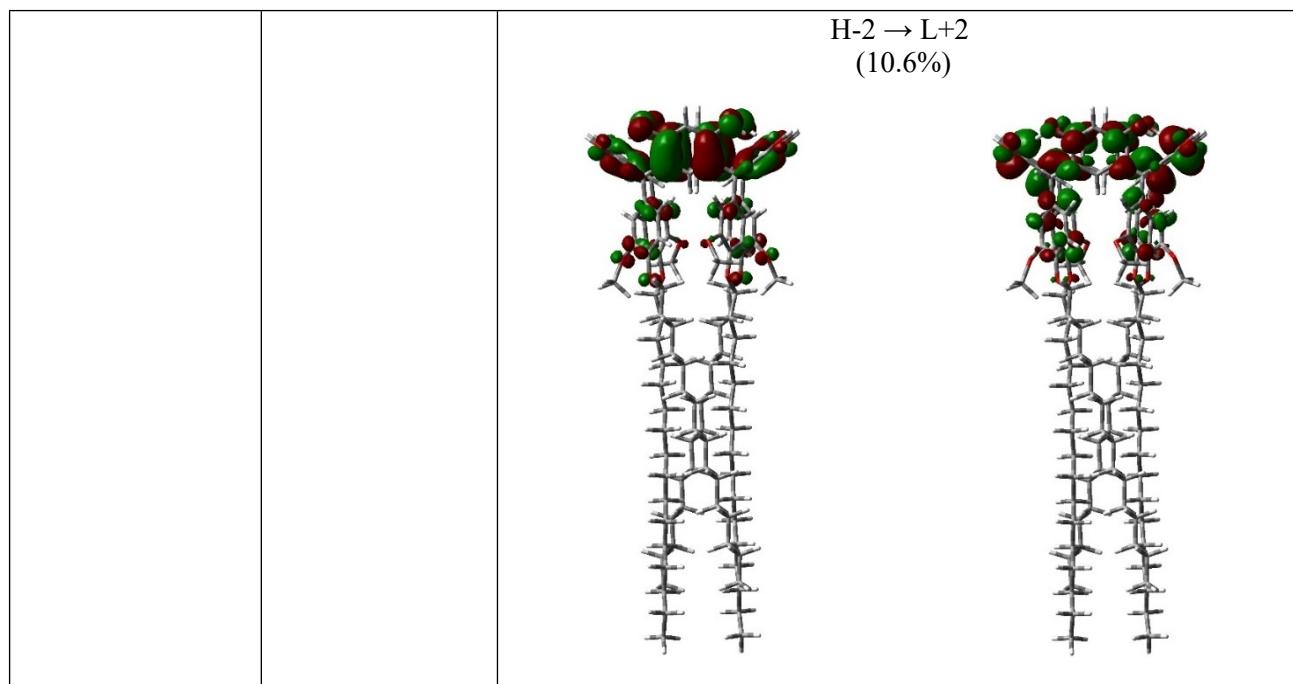

**Table S13.** NTO analysis of electronic transition 2 of **Cr-b** at the B3LYP/6-31G(d,p)/PCM(TFH) level of theory

| Compound (State)   | Transition energy ( $\lambda$ ) [eV (nm)] | NTO couple (Contribution)                                                                                                                |
|--------------------|-------------------------------------------|------------------------------------------------------------------------------------------------------------------------------------------|
| <b>Cr-b</b><br>(2) | 2.54 (273.07)                             | <p>H <math>\rightarrow</math> L<br/>(60.1%)</p> 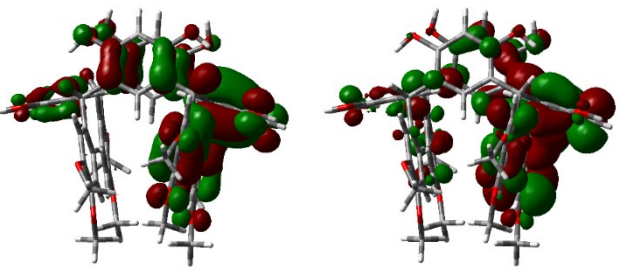     |
|                    |                                           | <p>H-1 <math>\rightarrow</math> L+1<br/>(32.3%)</p>  |

**Table S14.** NTO analysis of electronic transitions 5, 17 and 26 of Cr-c at the B3LYP/6-31G(d,p)/PCM(TFH) level of theory

| Compound (State) | Transition energy ( $\lambda$ ) [eV (nm)] | NTO couple (Contribution)                                                                                            |
|------------------|-------------------------------------------|----------------------------------------------------------------------------------------------------------------------|
| Cr-c (5)         | 4.43 (279.61)                             | H $\rightarrow$ L (75.7%)<br>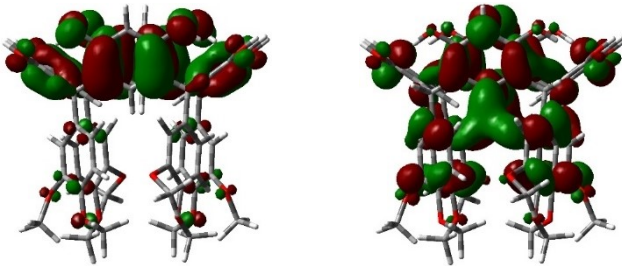      |
|                  |                                           | H-1 $\rightarrow$ L+1 (18.1%)<br> |
| Cr-c (17)        | 4.80 (258.25)                             | H $\rightarrow$ L (33.1%)<br>    |

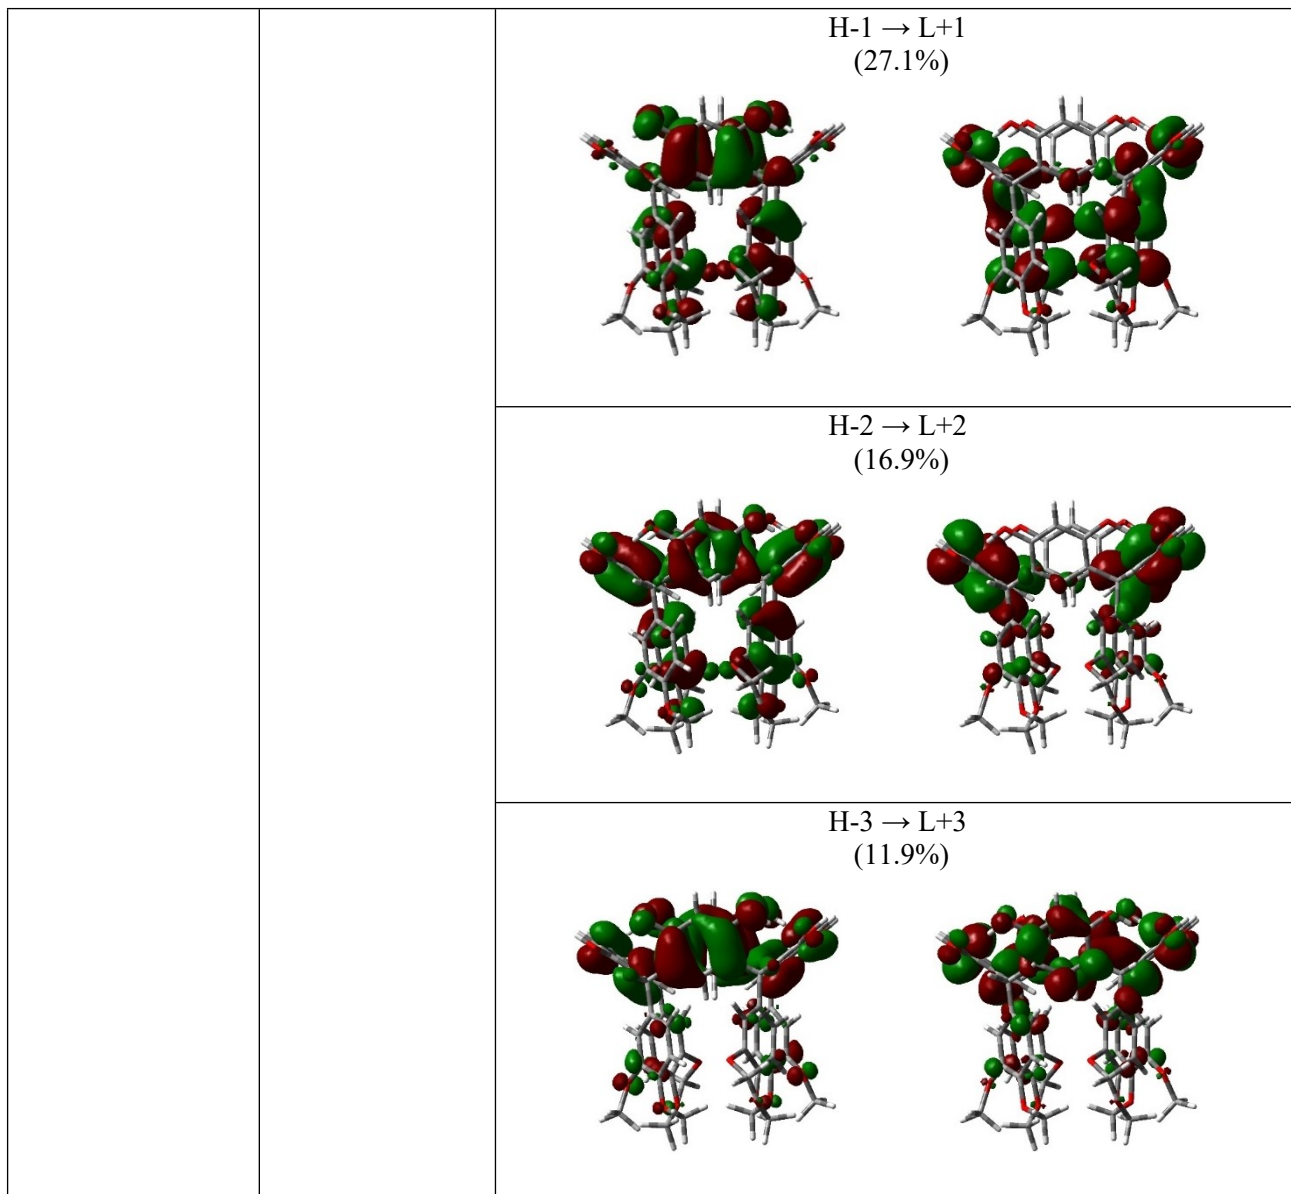

| Compound<br>(State) | Transition<br>energy ( $\lambda$ ) [eV<br>(nm)] | NTO couple<br>(Contribution)                                                                                                             |
|---------------------|-------------------------------------------------|------------------------------------------------------------------------------------------------------------------------------------------|
| Cr-c<br>(26)        | 4.92 (252.12)                                   | <p>H <math>\rightarrow</math> L<br/>(64.0%)</p> 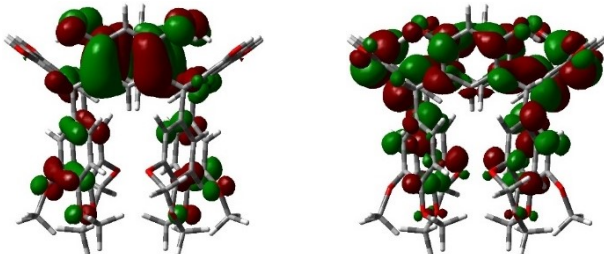       |
|                     |                                                 | <p>H-1 <math>\rightarrow</math> L+1<br/>(11.1%)</p>   |
|                     |                                                 | <p>H-2 <math>\rightarrow</math> L+2<br/>(10.8%)</p>  |

**Table S15.** NTO analysis of electronic transitions 4 and 13 of **D1-b** at the B3LYP/6-31G(d,p)/PCM(TFH) level of theory

| Compound<br>(State) | Transition energy<br>( $\lambda$ ) [eV (nm)] | NTO couple<br>(Contribution)                                                                                                            |
|---------------------|----------------------------------------------|-----------------------------------------------------------------------------------------------------------------------------------------|
| <b>D1-b</b><br>(4)  | 4.53 (273.75)                                | <p>H <math>\rightarrow</math> L<br/>(31.4%)</p> 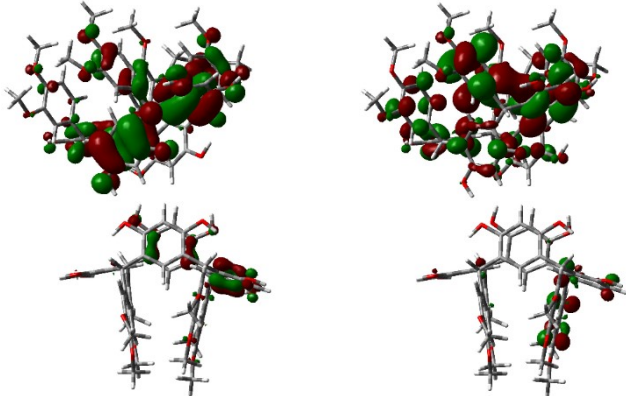      |
|                     |                                              | <p>H-1 <math>\rightarrow</math> L+1<br/>(30.1%)</p>  |

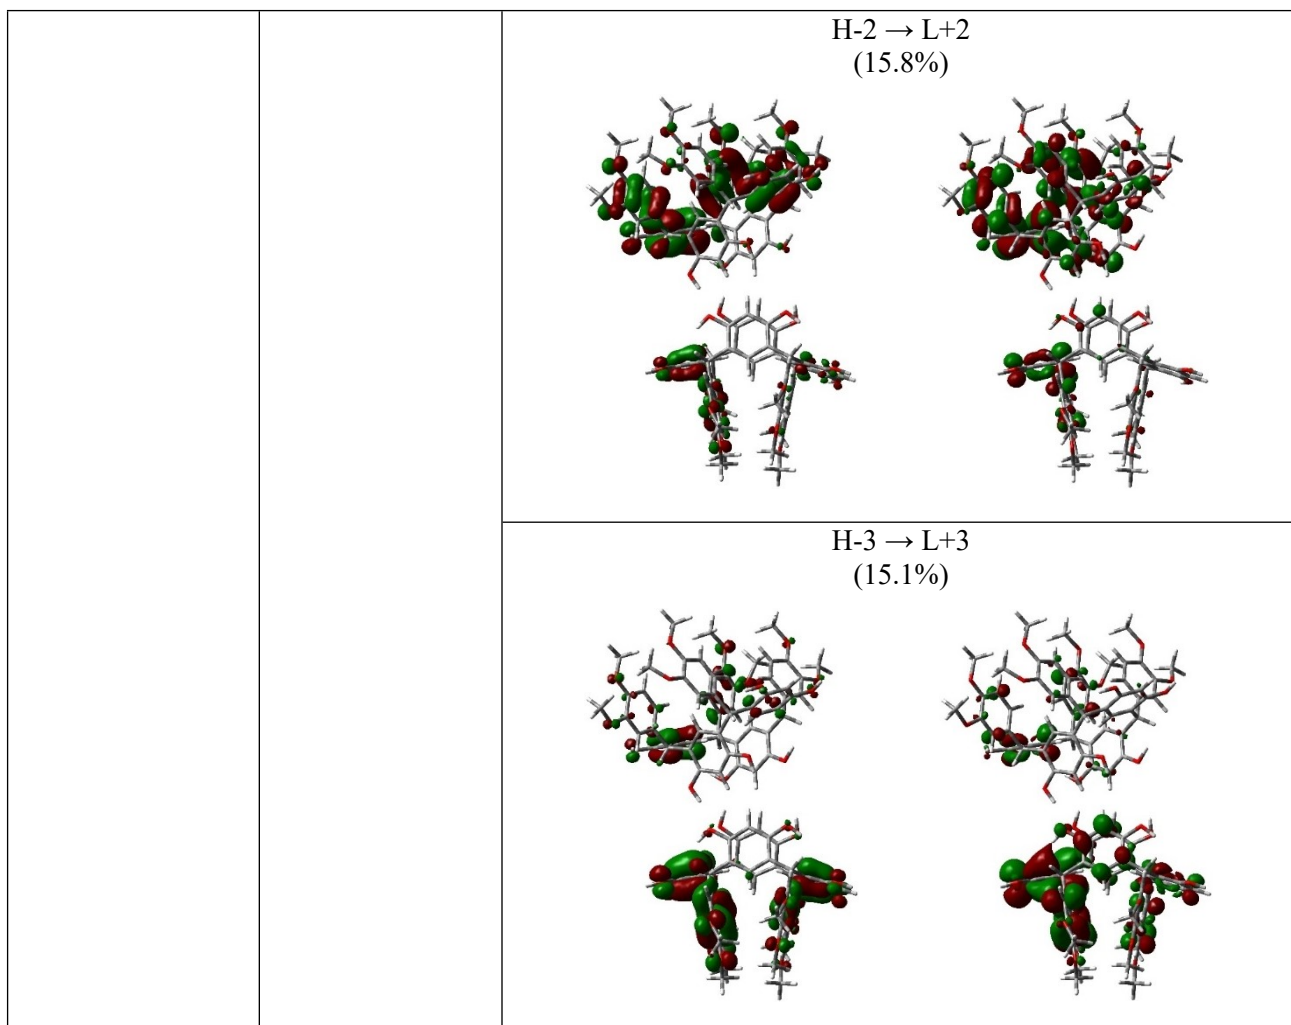

| Compound | Transition energy | NTO couple |
|----------|-------------------|------------|
|----------|-------------------|------------|

| (State)             | $(\lambda)$ [eV (nm)] | (Contribution)                                                                                                                                                                                        |
|---------------------|-----------------------|-------------------------------------------------------------------------------------------------------------------------------------------------------------------------------------------------------|
| <b>D1-b</b><br>(13) | 4.73 (262.40)         | <p data-bbox="1008 228 1101 256"><math>H \rightarrow L</math></p> <p data-bbox="1008 260 1101 287">(21.1%)</p> 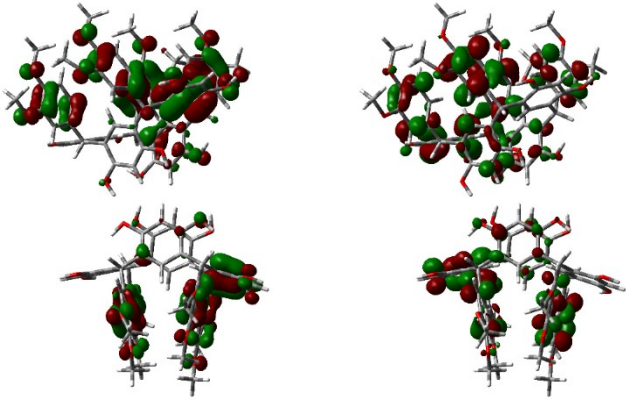     |
|                     |                       | <p data-bbox="984 739 1125 766"><math>H-1 \rightarrow L+1</math></p> <p data-bbox="1003 770 1105 798">(19.1%)</p>  |

H-2 → L+2  
(12.6%)

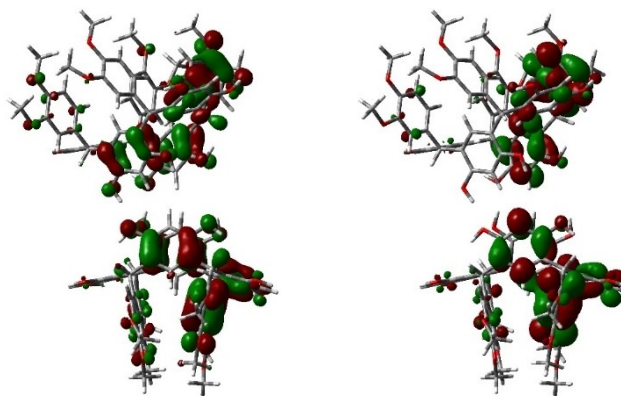

H-3 → L+3  
(10.8%)

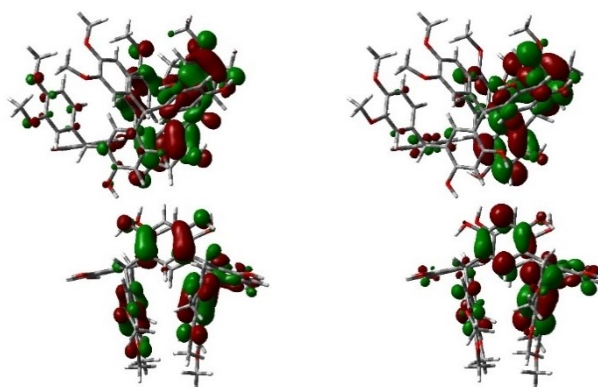



**Table S16.** NTO analysis of electronic transitions 7, 8 and 24 of **D1-c** at the B3LYP/6-31G(d,p)/PCM(TFH) level of theory

| Compound<br>(State) | Transition energy<br>( $\lambda$ ) [eV (nm)] | NTO couple<br>(Contribution)                                                                                                            |
|---------------------|----------------------------------------------|-----------------------------------------------------------------------------------------------------------------------------------------|
| D2-b<br>(7)         | 4.39 (282.65)                                | <p>H <math>\rightarrow</math> L<br/>(42.4%)</p> 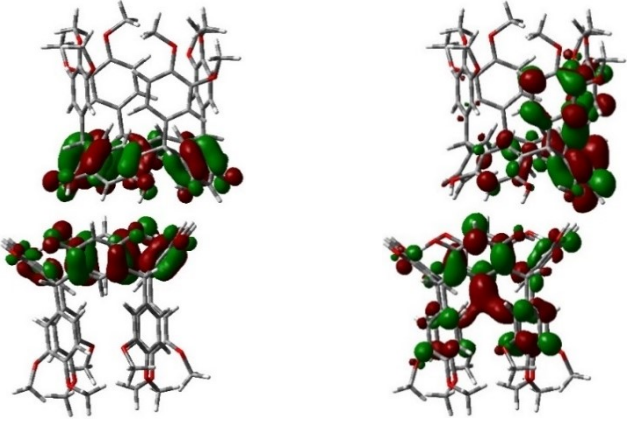      |
|                     |                                              | <p>H-1 <math>\rightarrow</math> L+1<br/>(34.7%)</p>  |

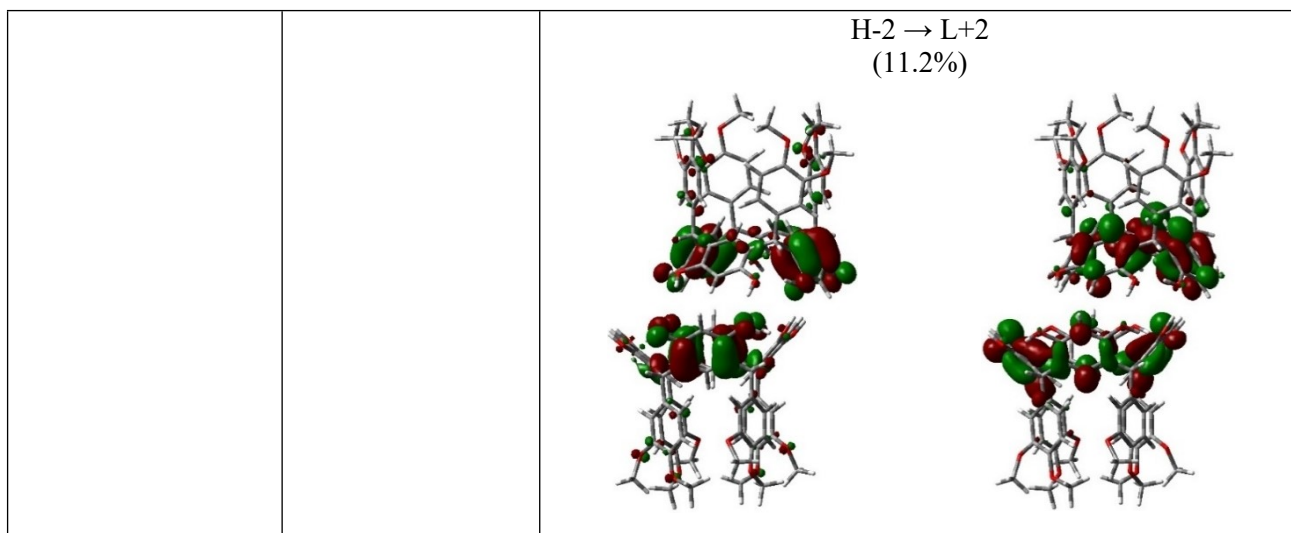

| Compound (State) | Transition energy ( $\lambda$ ) [eV (nm)] | NTO couple (Contribution) |
|------------------|-------------------------------------------|---------------------------|
| D2-b (8)         | 4.39 (282.42)                             | <p>H → L<br/>(39.6%)</p>  |

H-1 → L+1  
(35.4%)

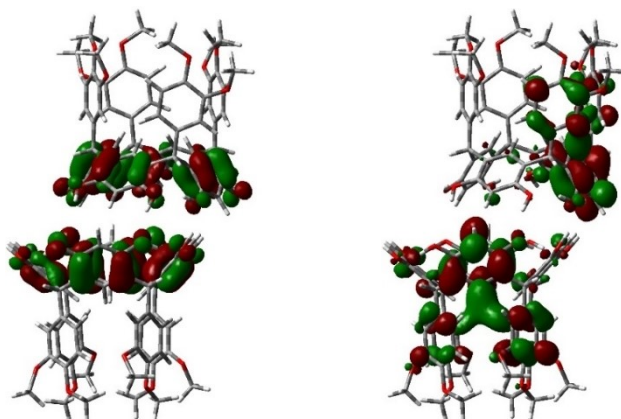

H-2 → L+2  
(12.1%)

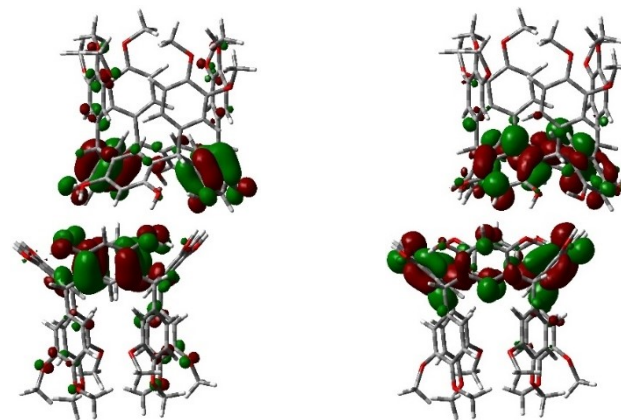

| Compound<br>(State) | Transition energy<br>( $\lambda$ ) [eV (nm)] | NTO couple<br>(Contribution)                                                                                                                                          |
|---------------------|----------------------------------------------|-----------------------------------------------------------------------------------------------------------------------------------------------------------------------|
| <b>D1-c</b><br>(24) | 4.64 (267.44)                                | <p data-bbox="998 262 1169 325">H <math>\rightarrow</math> L<br/>(33.6%)</p> 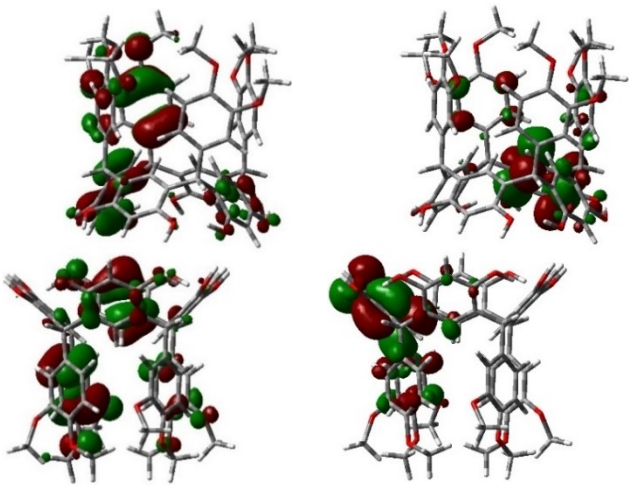       |
|                     |                                              | <p data-bbox="1015 867 1153 930">H-1 <math>\rightarrow</math> L+1<br/>(25.1%)</p>  |

H-2 → L+2  
(17.9%)

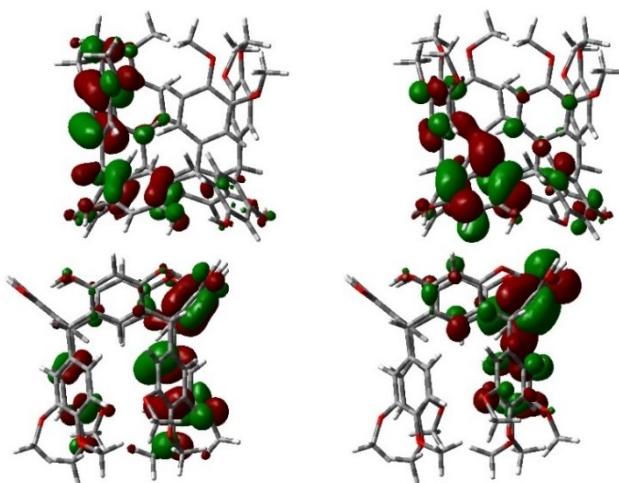

H-3 → L+3  
(14.6%)

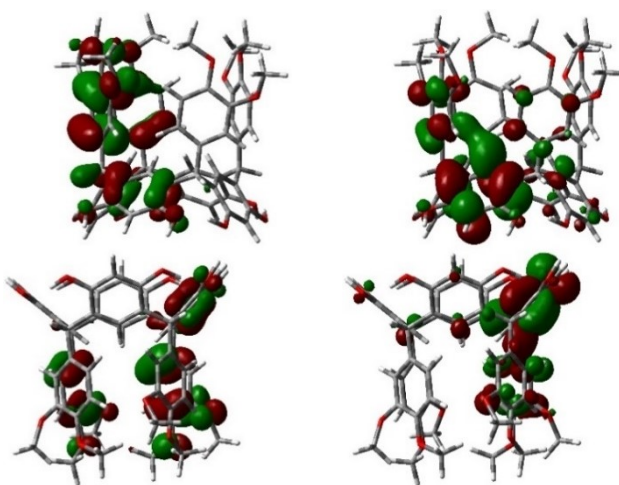

**Table S17.** NTO analysis of electronic transition 3 of **D2-b** at the B3LYP/6-31G(d,p)/PCM(TFH) level of theory

| Compound<br>(State) | Transition<br>energy ( $\lambda$ )<br>[eV (nm)] | NTO couple<br>(Contribution)                                                                                                                                           |
|---------------------|-------------------------------------------------|------------------------------------------------------------------------------------------------------------------------------------------------------------------------|
| <b>D2-b</b><br>(3)  | 4.53<br>(273.49)                                | <p data-bbox="954 394 1052 457"><math>H \rightarrow L</math><br/>(31.6%)</p> 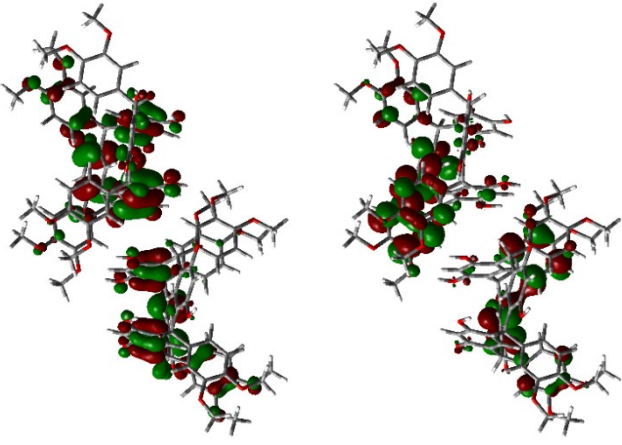        |
|                     |                                                 | <p data-bbox="928 949 1078 1012"><math>H-1 \rightarrow L+1</math><br/>(29.5%)</p>  |

H-2 → L+2  
(21.8%)

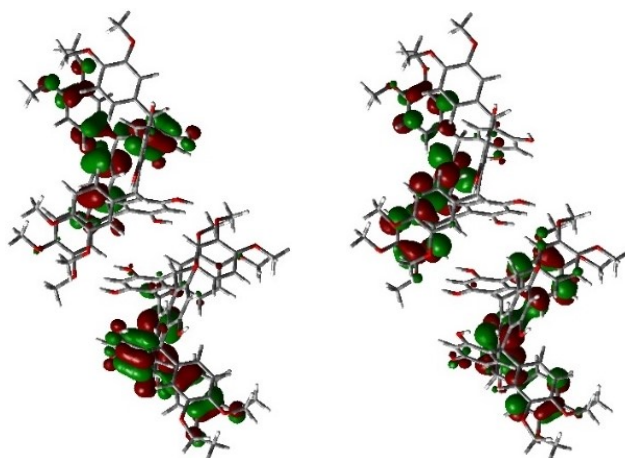

H-3 → L+3  
(12.1%)

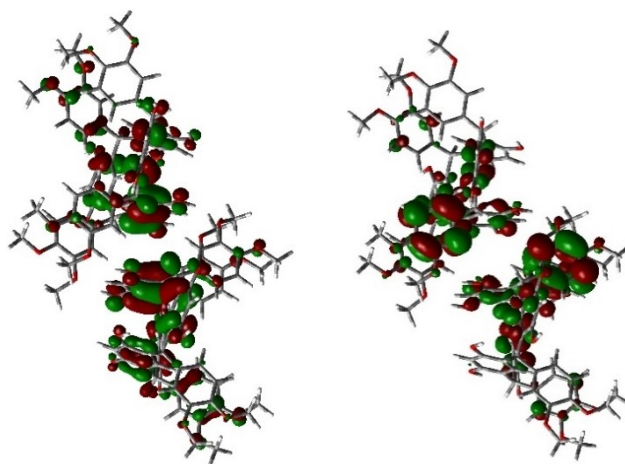

**Table S18.** NTO analysis of electronic transitions 8, 9 and 10 of **D2-c** at the B3LYP/6-31G(d,p)/PCM(TFH) level of theory

| Compound (State)   | Transition energy ( $\lambda$ ) [eV (nm)] | NTO couple (Contribution)                                                                                          |
|--------------------|-------------------------------------------|--------------------------------------------------------------------------------------------------------------------|
| <b>D2-c</b><br>(8) | 4.39 (282.54)                             | H $\rightarrow$ L<br>(95.4%)<br>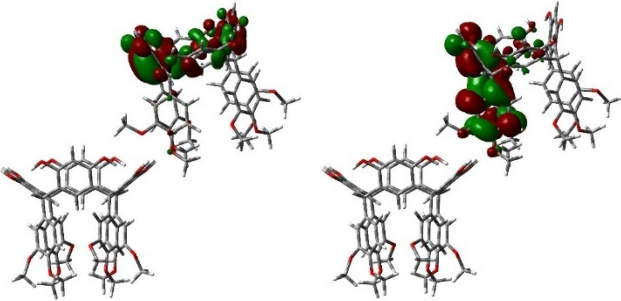 |

| Compound (State)   | Transition energy ( $\lambda$ ) [eV (nm)] | NTO couple (Contribution)                                                                                            |
|--------------------|-------------------------------------------|----------------------------------------------------------------------------------------------------------------------|
| <b>D2-c</b><br>(9) | 4.41 (281.29)                             | H $\rightarrow$ L<br>(95.2%)<br>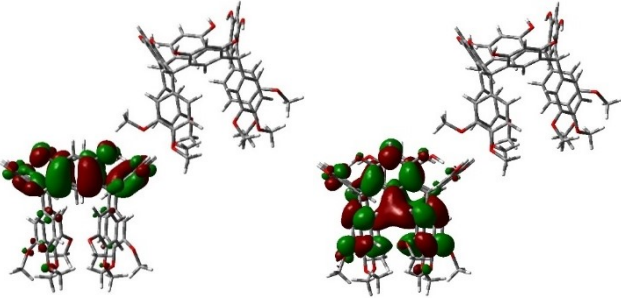 |

| Compound | Transition energy | NTO couple |
|----------|-------------------|------------|
|----------|-------------------|------------|



| (State)             | ( $\lambda$ ) [eV (nm)] | (Contribution)                                                                                                     |
|---------------------|-------------------------|--------------------------------------------------------------------------------------------------------------------|
| <b>D2-c</b><br>(10) | 4.41 (281.24)           | H $\rightarrow$ L<br>(93.9%)<br>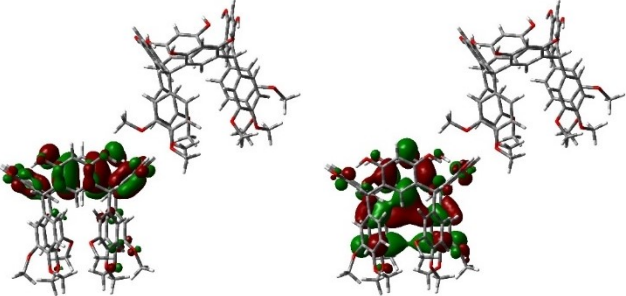 |

## REFERENCES

- 1 J. Coates, in *Encyclopedia of Analytical Chemistry*, John Wiley & Sons, Ltd, 2006.
- 2 2016. Gaussian 16, Revision C.01, M. J. Frisch, G. W. Trucks, H. B. Schlegel, G. E. Scuseria, M. A. Robb, J. R. Cheeseman, G. Scalmani, V. Barone, G. A. Petersson, H. Nakatsuji, X. Li, M. Caricato, A. V. Marenich, J. Bloino, B. G. Janesko, R. Gomperts, B. Mennu, .
- 3 R. D. T. A. K. GaussView Version 6.0 and S. M. K. S. 2016. John M. Millam Semichem Inc., .
- 4 N. M. O'Boyle, A. L. Tenderholt and K. M. Langner, cclib: A library for package-independent computational chemistry algorithms, *J Comput Chem*, 2008, **29**, 839–845.
